# Supplementary material
Source: Royal Society of Chemistry journal article supplement (doi:10.1039/d6cc01783e)

*Supporting Information*

**Diastereoselective Synthesis of  $\beta$  - Hydroxy Allylic  
Tertiary Sulfides via Nickel/Photoredox Cooperative  
Catalysis**

Heyang Xu, ‡<sup>[a]</sup> Zhixian Wu, ‡<sup>[a]</sup> Jing-Ran Shan, \*<sup>[b]</sup> Lei Shi \*<sup>[a]</sup>

[a] School of Chemistry, Dalian University of Technology, Dalian  
116024, China

[b] Department of Chemistry and Biochemistry, University of California  
Los Angeles, Los Angeles, California 90095, United States.

E-mail:

Lei Shi: shilei17@dlut.edu.cn

Jing-Ran Shan: jrshan@chem.ucla.edu

## Table of Contents

|                                                      |    |
|------------------------------------------------------|----|
| S1 General Information.....                          | 3  |
| S2 Reaction Set-Up and Light Source .....            | 4  |
| S3 Synthesis of Substrates .....                     | 5  |
| S4 Detailed Optimizations of Conditions .....        | 8  |
| S5 General Procedure.....                            | 14 |
| S6 Stern-Volmer Luminescence Quenching Analysis..... | 15 |
| S7 Mechanistic Studies .....                         | 16 |
| S8 Proposed mechanism .....                          | 17 |
| S9 Single crystal X-ray diffraction data.....        | 18 |
| S10 Computational Details .....                      | 20 |
| S11 Cartesian Coordinates .....                      | 21 |
| S12 Characterization data of Products .....          | 25 |
| S13 References.....                                  | 37 |
| S14 Spectra of Compounds.....                        | 38 |

## S1 General Information

Unless otherwise noted, all reactions of substrates preparation were conducted in flame-dried glassware under a nitrogen atmosphere using anhydrous solvent passed through an activated alumina column (Innovative Technology). Commercially available reagents were used without further purification. Thin-layer chromatography (TLC) was performed using Huanghai TLC silica gel plates HSG F254 and visualized using UV light, anisaldehyde, or potassium permanganate. The photocatalytic reactions were performed on WATTCAS Parallel Light Reactor (WP-TEC-1020L) with a 10W LED.  $^1\text{H}$  and  $^{13}\text{C}$  NMR spectra were recorded in  $\text{CDCl}_3$  on a Bruker 400 M and 500 M spectrometer. Chemical shifts in  $^1\text{H}$  NMR spectra were reported in parts per million (ppm) on the  $\delta =$  scale from an internal standard of residual  $\text{CDCl}_3$  (7.26 ppm). Data for  $^1\text{H}$  NMR were reported as follows: chemical shift, multiplicity (s = singlet, d = doublet, t = triplet, q = quartet, m = multiplet, br = broad), coupling constant in Hertz (Hz) and integration. Data for  $^{13}\text{C}$  NMR spectra were reported in terms of chemical shift in ppm from the central peak of  $\text{CDCl}_3$  (77.00 ppm). ESI mass spectra were obtained from an HPLC-Q-Tof mass spectrometer using acetonitrile as the mobile phase. The fluorescence emission spectra were collected on an Edinburg FLS1000. Chemicals were purchased from commercial suppliers. Unless stated otherwise, all the substrates and solvents were purified dried according to standard methods prior use.

## S2 Reaction Set-Up and Light Source

The photocatalytic reactions were performed on WATTCAS Parallel Light Reactor (WP-TEC-1020L).

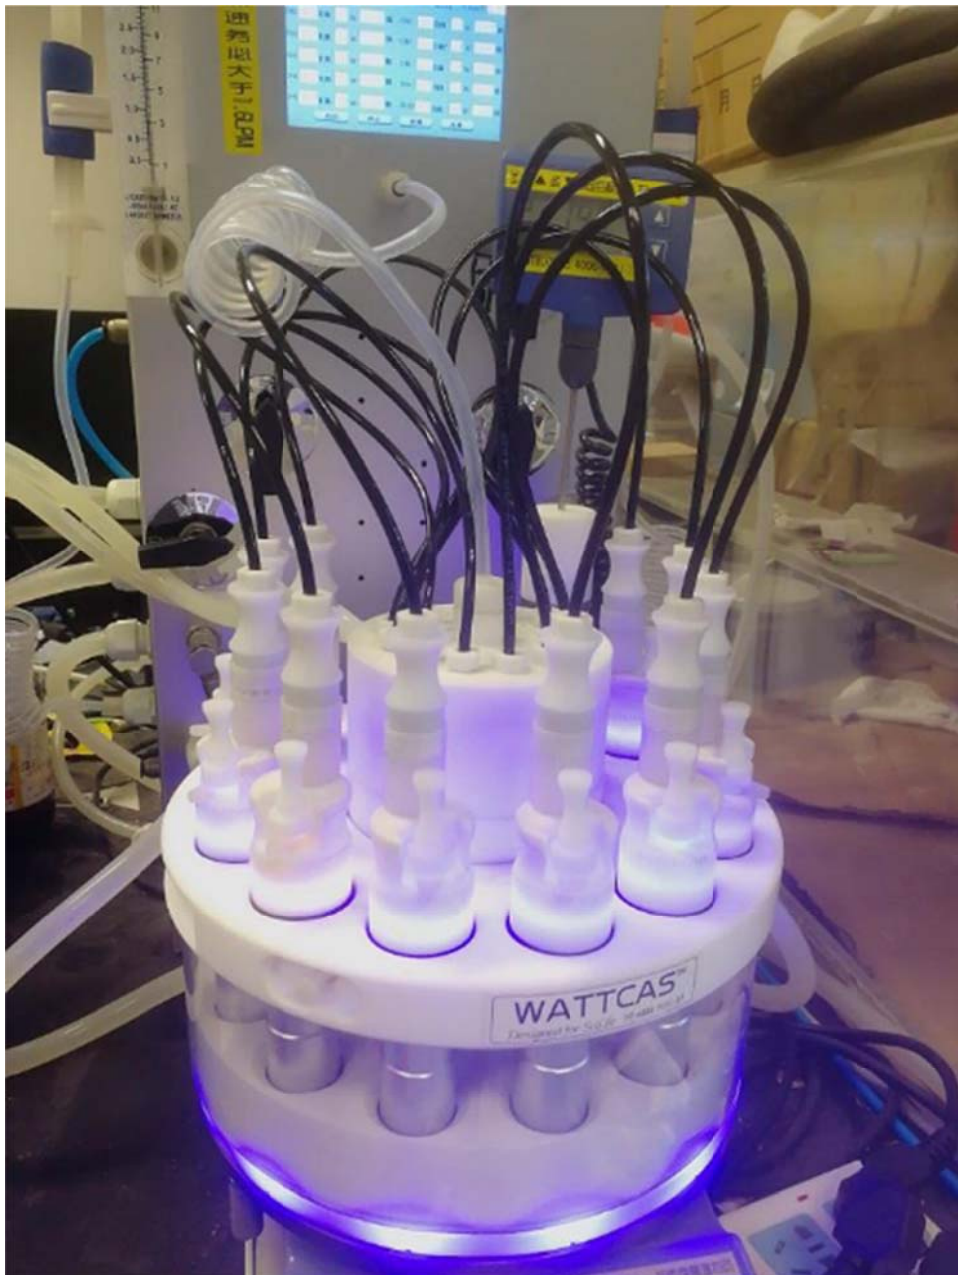

Emission spectra of the 10 W blue LED lamp (maximum emission at  $\lambda = 455$  nm). Wavelength: 450-455 nm Quartz glass was used as reaction vessel. Distance between the light source and quartz tube was approximately 0.5 cm and no filter was used for the reaction.

## S3 Synthesis of Substrates

1a-1x were obtained from commercial sources.

### S3.1 Synthesis of allyl substrates

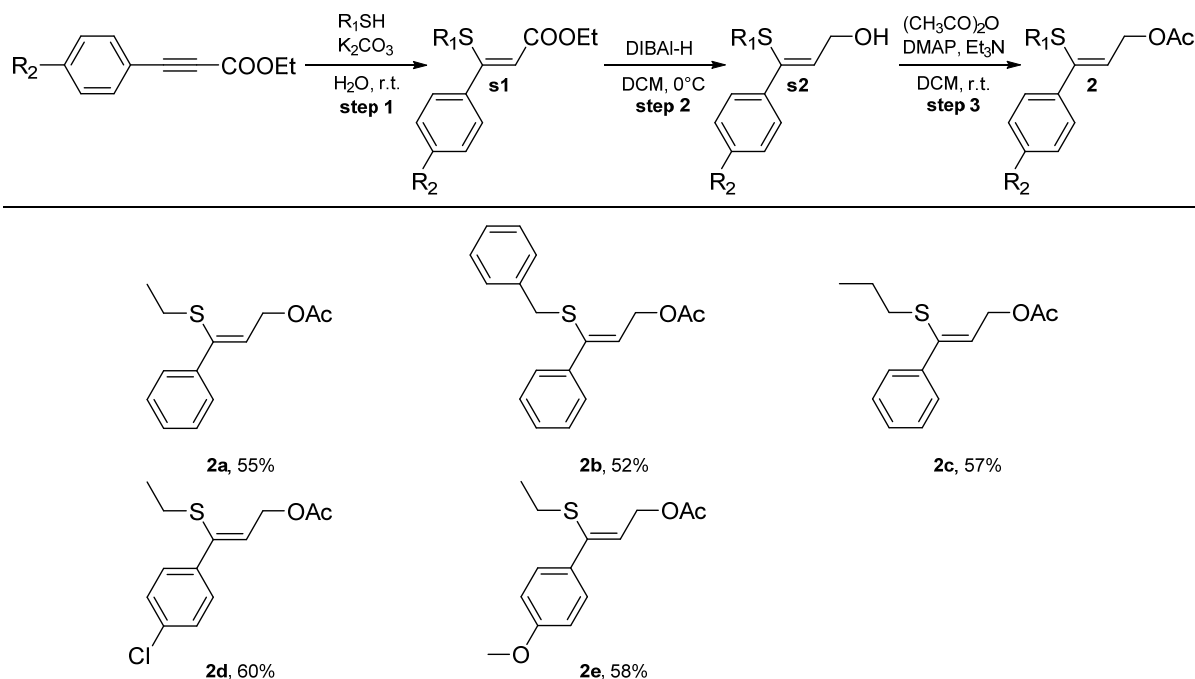

**Table S1** Synthesis of allyl substrates

**Step 1.** A round-bottom flask equipped with a magnetic stir bar was charged with  $K_2CO_3$  (28.7 mmol, 1.0 equiv.) and water (70 mL, 0.4 M), followed by ethyl propiolate (28.7 mmol, 1.0 equiv.) and ethanethiol (28.7 mmol, 1.0 equiv.). The mixture was stirred vigorously at room temperature for 24 h and monitored by TLC until complete consumption of the starting material.<sup>[1]</sup> The saturated  $Na_2CO_3$  was added into the system, followed by extraction with EA for three times. The organic layers were combined and washed with brine, dried over  $Na_2SO_4$  and filtered. The filtrate was concentrated under reduced pressure. The crude product was purified via silica gel column chromatography to obtain **s1** (72%) as yellow liquid.

**Step 2.** A double-neck flask equipped with a magnetic stir bar and **s1** (20.7 mmol, 1.0 equiv.) was purged with  $N_2$  three times.  $DCM$  (50 mL, 0.4 M) was added under  $N_2$  protection, and the mixture was stirred at  $0^\circ C$  for 15 min.  $DIBAL-H$  (51.7 mmol, 2.5 equiv.) was then added dropwise under  $N_2$  protection.<sup>[2]</sup> The mixture was stirred at  $0^\circ C$  and monitored by TLC. After approximately 2 h, the reaction was complete, and  $HCl$  (1M) was added dropwise slowly at  $0^\circ C$ . Vigorous gas evolution was observed during the quenching, and the mixture turned into a gelatinous mass. Upon further addition of  $HCl$  with continued stirring, the mixture reverted to a clear solution, followed by extraction with  $DCM$  for three times. The organic layers were combined, dried over  $Na_2SO_4$  and filtered. The filtrate was concentrated under reduced pressure. The residue containing the unstable intermediate **s2** was used directly in the next step without complete removal of the  $DCM$ .

**Step 3.** A round-bottom flask equipped with a magnetic stir bar and containing the intermediate **s2** (20.7 mmol, 1.0 equiv.) in  $DCM$  was added sequentially  $DMAP$  (2.1 mmol, 0.1 equiv.),  $Et_3N$  (41.4 mmol, 2.0 equiv.) and  $(CH_3CO)_2O$  (31.1 mmol, 1.5 equiv.).<sup>[3]</sup> The mixture was stirred at room

temperature and monitored by TLC. After approximately 2 h, the reaction was complete. The mixture was concentrated under reduced pressure. The crude product was purified by silica gel column chromatography to obtain **2**.

### (Z)-3-(ethylthio)-3-phenylallyl acetate (**2a**)

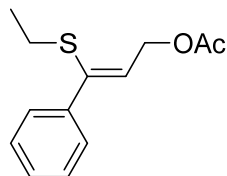

Purified by silica gel flash column chromatograph (EA/PE = 1/100) to give **2a** as yellow liquid.

R<sub>f</sub> = 0.5 (EA/PE = 1/10).

<sup>1</sup>H NMR (400 MHz, CDCl<sub>3</sub>) δ 7.52 (d, *J* = 6.8 Hz, 2H), 7.37 – 7.30 (m, 3H), 6.06 (t, *J* = 6.4 Hz, 1H), 4.97 (d, *J* = 6.4 Hz, 2H), 2.39 (q, *J* = 7.2 Hz, 2H), 2.09 (s, 3H), 1.06 (t, *J* = 7.2 Hz, 3H).

<sup>13</sup>C NMR (101 MHz, CDCl<sub>3</sub>) δ 170.8, 140.9, 138.9, 128.3, 128.2, 128.1, 127.9, 62.5, 26.2, 20.9, 14.9.

HRMS-ESI<sup>+</sup> (m/z) [M+Na]<sup>+</sup> calculated for C<sub>13</sub>H<sub>16</sub>O<sub>2</sub>SNa, 259.0763, found: 259.0760.

### (Z)-3-(benzylthio)-3-phenylallyl acetate (**2b**)

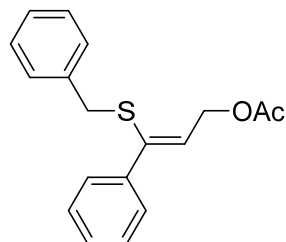

Purified by silica gel flash column chromatograph (EA/PE = 1/100) to give **2b** as yellow liquid.

R<sub>f</sub> = 0.5 (EA/PE = 1/10).

<sup>1</sup>H NMR (500 MHz, CDCl<sub>3</sub>) δ 7.58 (d, *J* = 7.1 Hz, 2H), 7.46 – 7.39 (m, 3H), 7.29 – 7.22 (m, 3H), 7.08 (d, *J* = 7.1 Hz, 2H), 6.11 (t, *J* = 6.5 Hz, 1H), 4.85 (d, *J* = 6.5 Hz, 2H), 3.65 (s, 2H), 2.09 (s, 3H).

<sup>13</sup>C NMR (126 MHz, CDCl<sub>3</sub>) δ 170.7, 140.4, 138.8, 137.8, 129.0, 128.6, 128.4, 128.3, 128.1, 128.0, 126.8, 62.4, 36.8, 20.8.

HRMS-ESI<sup>+</sup> (m/z) [M+Na]<sup>+</sup> calculated for C<sub>18</sub>H<sub>18</sub>O<sub>2</sub>SNa, 321.0920, found: 321.0922.

### (Z)-3-phenyl-3-(propylthio)allyl acetate (**2c**)

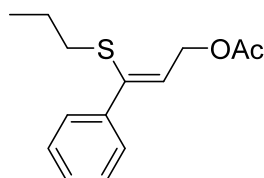

Purified by silica gel flash column chromatograph (EA/PE = 1/100) to give **2c** as yellow liquid.

R<sub>f</sub> = 0.5 (EA/PE = 1/10).

$^1\text{H NMR}$  (500 MHz,  $\text{CDCl}_3$ )  $\delta$  7.50 (dd,  $J = 8.2, 1.4$  Hz, 2H), 7.34 – 7.27 (m, 3H), 6.02 (t,  $J = 6.4$  Hz, 1H), 4.96 (d,  $J = 6.5$  Hz, 2H), 2.33 (t, 2H), 2.05 (s, 3H), 1.38 (h,  $J = 7.3$  Hz, 2H), 0.82 (t,  $J = 7.4$  Hz, 3H).

$^{13}\text{C NMR}$  (126 MHz,  $\text{CDCl}_3$ )  $\delta$  170.5, 141.1, 138.8, 128.1, 128.0, 127.8, 127.7, 62.3, 33.9, 22.9, 20.7, 12.8.

HRMS-ESI $^+$  (m/z)  $[\text{M}+\text{Na}]^+$  calculated for  $\text{C}_{14}\text{H}_{18}\text{O}_2\text{SNa}$ , 273.0920, found: 273.0923.

### (Z)-3-(4-chlorophenyl)-3-(ethylthio)allyl acetate (2d)

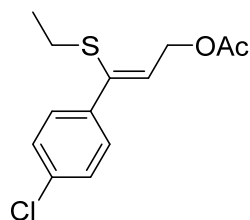

Purified by silica gel flash column chromatograph (EA/PE = 1/100) to give **2d** as yellow liquid.

R<sub>f</sub> = 0.5 (EA/PE = 1/10).

$^1\text{H NMR}$  (500 MHz,  $\text{CDCl}_3$ )  $\delta$  7.45 (d,  $J = 7.5$  Hz, 2H), 7.30 (d,  $J = 7.4$  Hz, 2H), 6.04 (t,  $J = 6.2$  Hz, 1H), 4.93 (d,  $J = 6.4$  Hz, 2H), 2.35 (q,  $J = 7.3$  Hz, 2H), 2.07 (s, 3H), 1.04 (t,  $J = 7.4$  Hz, 3H).

$^{13}\text{C NMR}$  (126 MHz,  $\text{CDCl}_3$ )  $\delta$  170.8, 139.6, 137.4, 134.0, 129.1, 128.8, 128.5, 62.4, 26.2, 20.9, 14.9.

HRMS-ESI $^+$  (m/z)  $[\text{M}+\text{Na}]^+$  calculated for  $\text{C}_{13}\text{H}_{15}\text{ClO}_2\text{SNa}$ , 293.0373, found: 293.0376.

### (Z)-3-(ethylthio)-3-(4-methoxyphenyl)allyl acetate (2e)

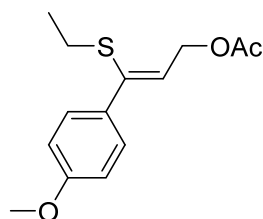

Purified by silica gel flash column chromatograph (EA/PE = 1/100) to give **2e** as yellow liquid.

R<sub>f</sub> = 0.3 (EA/PE = 1/10).

$^1\text{H NMR}$  (500 MHz,  $\text{CDCl}_3$ )  $\delta$  7.46 (d,  $J = 8.5$  Hz, 2H), 6.88 (d,  $J = 8.6$  Hz, 2H), 6.00 (t,  $J = 6.5$  Hz, 1H), 4.95 (d,  $J = 6.6$  Hz, 2H), 3.81 (s, 3H), 2.39 (q,  $J = 7.3$  Hz, 2H), 2.09 (s, 3H), 1.05 (t,  $J = 7.3$  Hz, 3H).

$^{13}\text{C NMR}$  (126 MHz,  $\text{CDCl}_3$ )  $\delta$  170.9, 159.6, 140.7, 131.3, 129.1, 126.7, 113.7, 62.6, 55.2, 26.2, 21.0, 15.0.

HRMS-ESI $^+$  (m/z)  $[\text{M}+\text{Na}]^+$  calculated for  $\text{C}_{14}\text{H}_{18}\text{O}_3\text{SNa}$ , 289.0869, found: 289.0872.

## S4 Detailed Optimizations of Conditions

**Table S2** Screening of Photocatalysts<sup>a,b,c</sup>

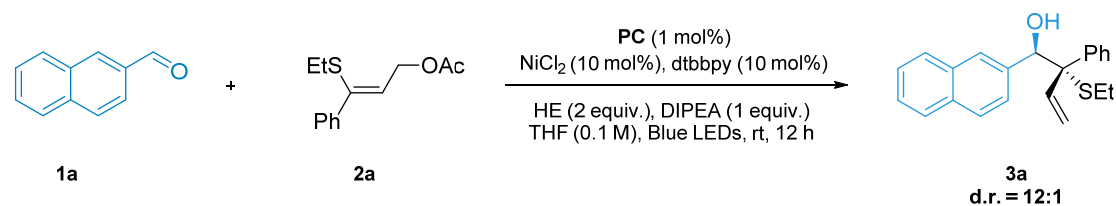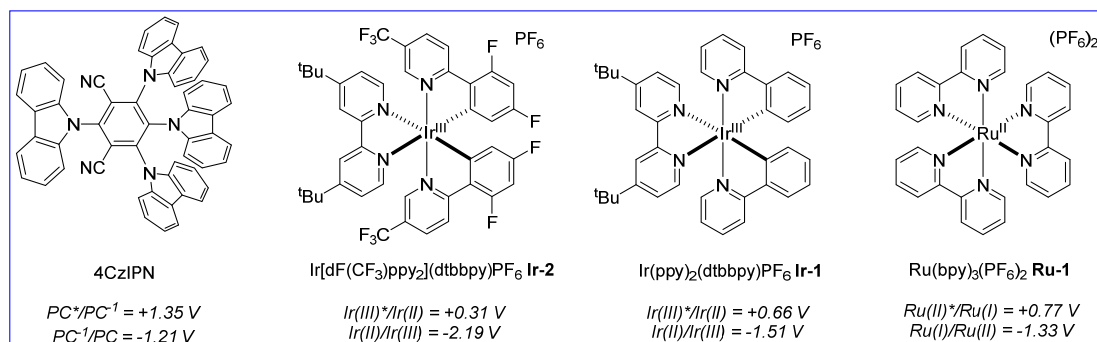

| Entry | Photocatalysts                                                        | Yield (%) | d.r. |
|-------|-----------------------------------------------------------------------|-----------|------|
| 1     | 4CzIPN                                                                | 85        | 12:1 |
| 2     | Ir[dF(CF <sub>3</sub> )ppy] <sub>2</sub> (dtbbpy)PF <sub>6</sub> Ir-2 | 64        | 12:1 |
| 3     | Ir(ppy) <sub>2</sub> (dtbbpy)PF <sub>6</sub> Ir-1                     | 49        | 12:1 |
| 4     | Ru(bpy) <sub>3</sub> (PF <sub>6</sub> ) <sub>2</sub> Ru-1             | 0         | -    |

[a] Reaction conditions: **1a** (0.1 mmol), **2a** (0.3 mmol), 12 h. [b] Yields were determined by <sup>1</sup>H NMR analysis with 1,3,5-trimethoxybenzene as the internal standard. [c] The diastereoselectivity was determined by <sup>1</sup>H NMR.

Based on the hard–soft acid–base (HSAB) theory, sulfur atoms in sulfides are typical soft bases. Conventional nucleophilic allylation mostly relies on noble metal catalysts (Pd, Ir, Rh) whose active species are classic soft acids. Sulfur will form stable, irreversible coordination bonds with these metals, causing severe catalyst poisoning and deactivation, which is the core reason why conventional methods fail to realize this transformation. In contrast, the catalytically active species of nickel are borderline acids in the HSAB classification, which have much weaker binding affinity toward soft sulfur donors. The weak and reversible S–Ni coordination will not cause irreversible catalyst poisoning, enabling our nickel-based system to inherently circumvent this limitation and achieve the desired allylation efficiently.

**Table S3** Screening of Solvents<sup>a,b,c</sup>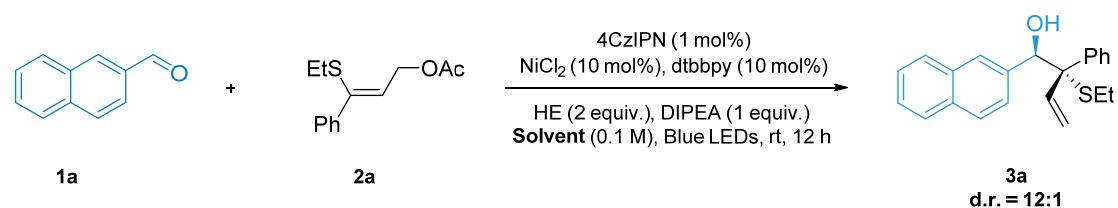

| Entry | Solvents          | Yield (%) | d.r. |
|-------|-------------------|-----------|------|
| 1     | THF               | 85        | 12:1 |
| 2     | MeCN              | 47        | 12:1 |
| 3     | 1,4-Dioxane       | 60        | 12:1 |
| 4     | Et <sub>2</sub> O | 61        | 2:1  |

[a] Reaction conditions: **1a** (0.1 mmol), **2a** (0.3 mmol), 12 h. [b] Yields were determined by <sup>1</sup>H NMR analysis with 1,3,5-trimethoxybenzene as the internal standard. [c] The diastereoselectivity was determined by <sup>1</sup>H NMR.

We speculate that the reduced diastereoselectivity in diethyl ether arises from its weaker solvation ability compared with the cyclic ethers THF and 1,4-dioxane. Polar cyclic ethers may better stabilize the stereoselective transition state of the reaction, while acyclic diethyl ether with lower polarity cannot provide sufficient stabilization, resulting in decreased diastereoselectivity.

**Table S4** Screening of Nickel salts<sup>a,b,c</sup>

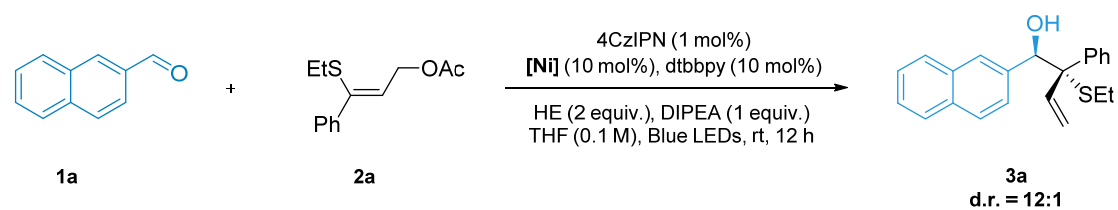

| Entry | Nickel salts         | Yield (%) | d.r. |
|-------|----------------------|-----------|------|
| 1     | NiCl <sub>2</sub>    | 85        | 12:1 |
| 2     | NiBr <sub>2</sub>    | 73        | 12:1 |
| 3     | NiF <sub>2</sub>     | 0         | -    |
| 4     | Ni(OTf) <sub>2</sub> | 50        | 12:1 |
| 5     | Ni(COD) <sub>2</sub> | 0         | -    |
| 6     | Ni(OH) <sub>2</sub>  | 0         | -    |
| 7     | NiCO <sub>3</sub>    | 0         | -    |

[a] Reaction conditions: **1a** (0.1 mmol), **2a** (0.3 mmol), 12 h. [b] Yields were determined by <sup>1</sup>H NMR analysis with 1,3,5-trimethoxybenzene as the internal standard. [c] The diastereoselectivity was determined by <sup>1</sup>H NMR.

**Table S5** Screening of Ligands<sup>a,b,c</sup>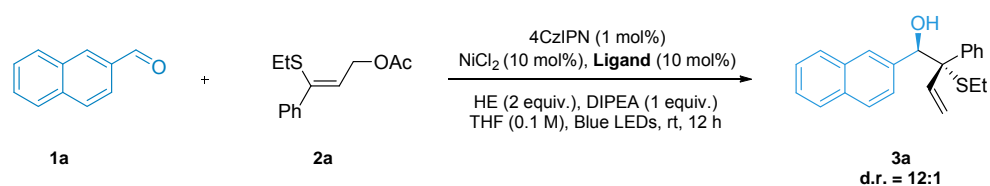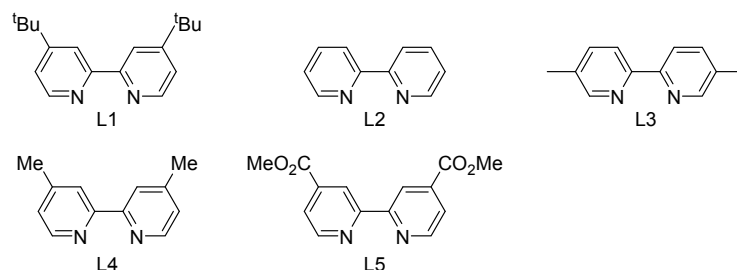

| Entry | Ligands | Yield (%) | d.r. |
|-------|---------|-----------|------|
| 1     | L1      | 85        | 12:1 |
| 2     | L2      | 75        | 10:1 |
| 3     | L3      | 51        | 4:1  |
| 4     | L4      | 53        | 5:1  |
| 5     | L5      | 28        | 3:1  |

[a] Reaction conditions: **1a** (0.1 mmol), **2a** (0.3 mmol), 12 h. [b] Yields were determined by <sup>1</sup>H NMR analysis with 1,3,5-trimethoxybenzene as the internal standard. [c] The diastereoselectivity was determined by <sup>1</sup>H NMR.

We hypothesize that the significant difference in diastereoselectivity among L1, L2 and L4 may be attributed to the combined electronic and steric effects of the ligands. The electron-donating ability and steric bulk of the ligand substituents may follow the order L1 > L4 > L2. We speculate that stronger electron donation from L1 may elevate the electron density of the Ni center, enhancing the nucleophilicity of the allyl-nickel intermediate and amplifying the energy difference between diastereomeric transition states. Meanwhile, the bulky substituents of L1 may form a congested coordination sphere around Ni, which may restrict aldehyde addition to the sterically favorable anti-pathway, thus delivering the highest diastereoselectivity.

**Table S6** Screening of Metals<sup>a,b,c</sup>

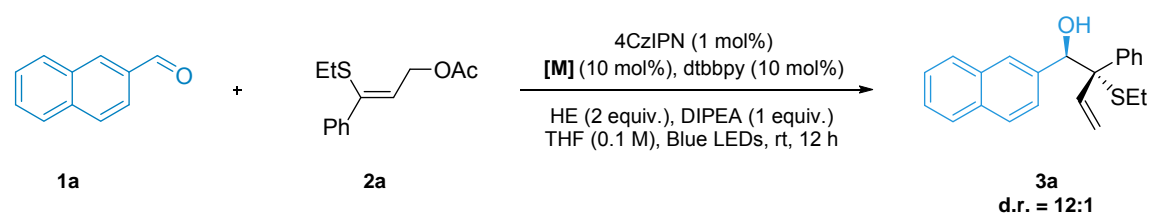

| Entry | Metals                            | Yield (%) | d.r. |
|-------|-----------------------------------|-----------|------|
| 1     | NiCl <sub>2</sub>                 | 85        | 12:1 |
| 2     | CoBr <sub>2</sub>                 | 0         | -    |
| 3     | CoCl <sub>2</sub>                 | 0         | -    |
| 4     | CrCl <sub>2</sub>                 | 0         | -    |
| 5     | Cp <sub>2</sub> TiCl <sub>2</sub> | 0         | -    |

[a] Reaction conditions: **1a** (0.1 mmol), **2a** (0.3 mmol), 12 h. [b] Yields were determined by <sup>1</sup>H NMR analysis with 1,3,5-trimethoxybenzene as the internal standard. [c] The diastereoselectivity was determined by <sup>1</sup>H NMR.

**Table S7** Control experiments<sup>a,b,c</sup>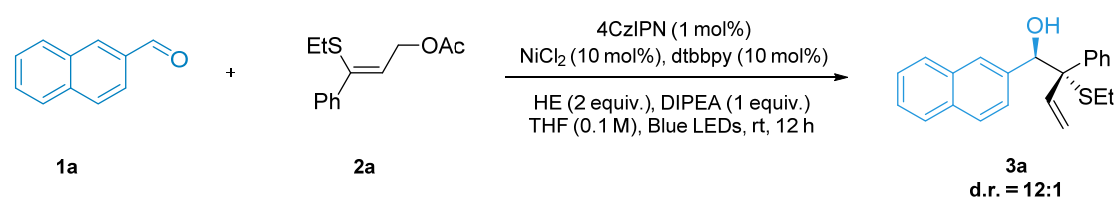

| Entry | Conditions           | Yield (%) | d.r. |
|-------|----------------------|-----------|------|
| 1     | As show              | 85        | 12:1 |
| 2     | No NiCl <sub>2</sub> | 0         | -    |
| 3     | No dtbbpy            | 0         | -    |
| 4     | No 4CzIPN            | 22        | 12:1 |
| 5     | No HE                | 38        | 3:1  |
| 6     | No DIPEA             | 70        | 12:1 |
| 7     | No light             | 0         | -    |
| 8     | No 4CzIPN and DIPEA  | 11        | 12:1 |
| 9     | No 4CzIPN and HE     | 0         | -    |
| 10    | No HE and DIPEA      | 0         | -    |

[a] Reaction conditions: **1a** (0.1 mmol), **2a** (0.3 mmol), 12 h. [b] Yields were determined by <sup>1</sup>H NMR analysis with 1,3,5-trimethoxybenzene as the internal standard. [c] The diastereoselectivity was determined by <sup>1</sup>H NMR.

## S5 General Procedure

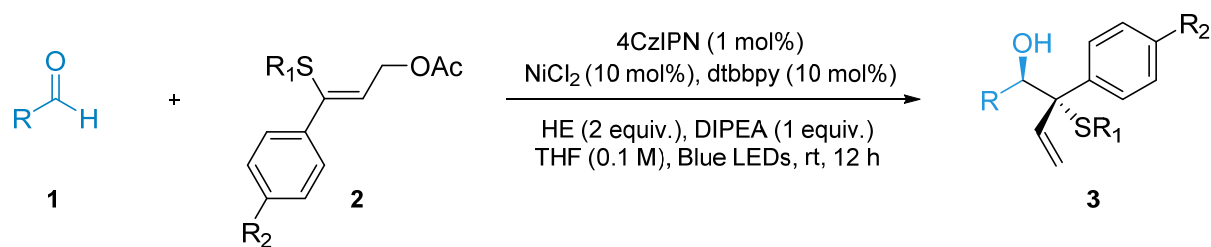

An oven-dried Schlenk tube containing a stir bar was charged under nitrogen with NiCl<sub>2</sub> (0.02 mmol, 10 mol%), dtbbpy (0.02 mmol, 10 mol%) and THF (0.1 M). The above mixture was stirred in N<sub>2</sub>-filled glovebox for 2 h till clear. Subsequently, 4CzIPN (0.002 mmol, 1 mol%), HE (0.4 mmol, 2.0 equiv.), DIPEA (0.2 mmol, 1.0 equiv.), corresponding **1** (0.2 mmol, 1.0 equiv.) and **2** (0.6 mmol, 3.0 equiv.) were added. The reaction mixture was then stirred at room temperature under blue LEDs irradiation (10 W, 450 nm) for 12 h. After completing, the reaction mixture was purified by silica gel column chromatography (PE/EA) and refined by semipre HPLC (PE/EA) to afford the corresponding compounds.

non-reactive substrates.

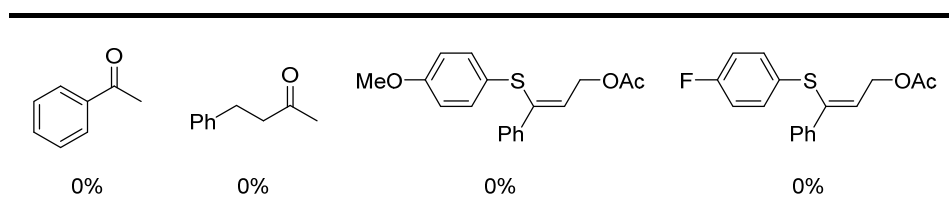

## S6 Stern-Volmer Luminescence Quenching Analysis

All samples used in the luminescence quenching-based screening studies were prepared under oxygen free conditions. The photosensitizer 4CzIPN and potential quenchers were weighed into vials and placed inside a glovebox under a positive pressure of nitrogen. THF was degassed by nitrogen sparging for one hour and also placed inside along with micropipettes and their tips, cuvettes, empty vials, waste containers and parafilm. SternVolmer luminescence quenching studies were carried out using  $1.0 \times 10^{-5}$  M solution of 4CzIPN and equal concentrations of HE and allyl substrate (**2a**) and DIPEA and Ni(dtbbpy)Cl<sub>2</sub> in degassed and dried THF at room temperature under an nitrogen atmosphere. The samples were prepared in screw-top 4.5 cm quartz cuvettes, equipped with PTFE stopper, and sealed with parafilm inside a nitrogen-filled glovebox. The solutions were irradiated at 396 nm and the luminescence was measured at 518 nm. The ratio of  $I_0/I$  was plotted as a function of the quencher concentration ( $I_0$  = emission intensity of the photocatalyst in isolation at the specified wavelength;  $I$  = observed emission intensity of the photocatalyst with added quencher). The results verify that HE exhibits the highest quenching efficiency toward the photosensitizer 4CzIPN.

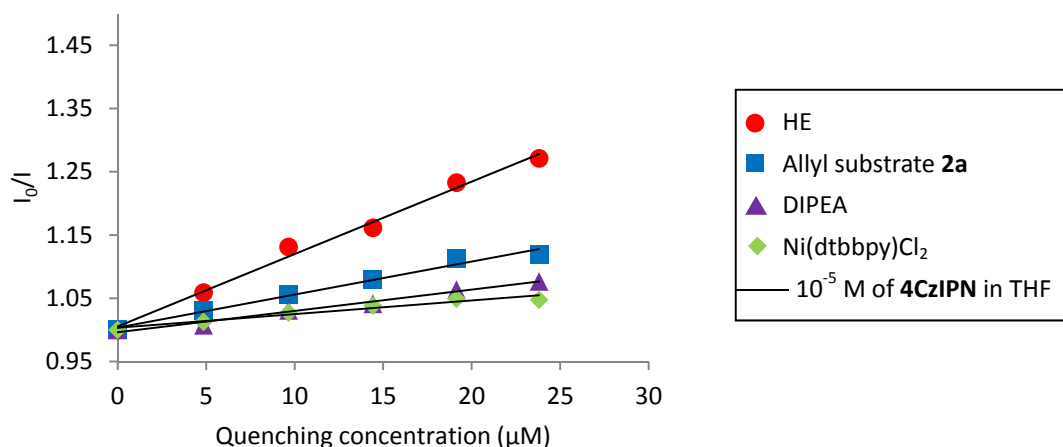

**Figure S1.** 4CzIPN emission quenching by HE, **2a**, DIPEA, Ni(dtbbpy)Cl<sub>2</sub>

## S7 Mechanistic Studies

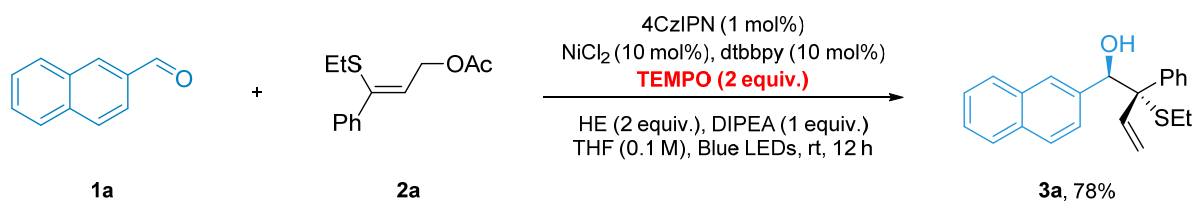

An oven-dried Schlenk tube containing a stir bar was charged under nitrogen with NiCl<sub>2</sub> (0.01 mmol, 10 mol%), dtbbpy (0.01 mmol, 10 mol%) and THF (0.1 M). the above mixture was stirred in N<sub>2</sub>-filled glovebox for 2h. Subsequently, 4CzIPN (0.001 mmol, 1 mol%), HE (0.2 mmol, 2equiv.) and DIPEA (0.1 mmol, 1 equiv.), corresponding **1a** (0.1 mmol, 1 equiv.), **2a** (0.3 mmol, 3 equiv.) and radical inhibitor (TEMPO, 2 equiv.) were added. The reaction mixture was then stirred at room temperature under blue LEDs irradiation (10 W, 450 nm). After 12 h, the reaction mixture was filtered through a short layer of silica gel and the filtrate was concentrated in vacuo. The results of <sup>1</sup>H NMR and HRMS showed that the reaction was not inhibited.

## S8 Mechanistic Studies

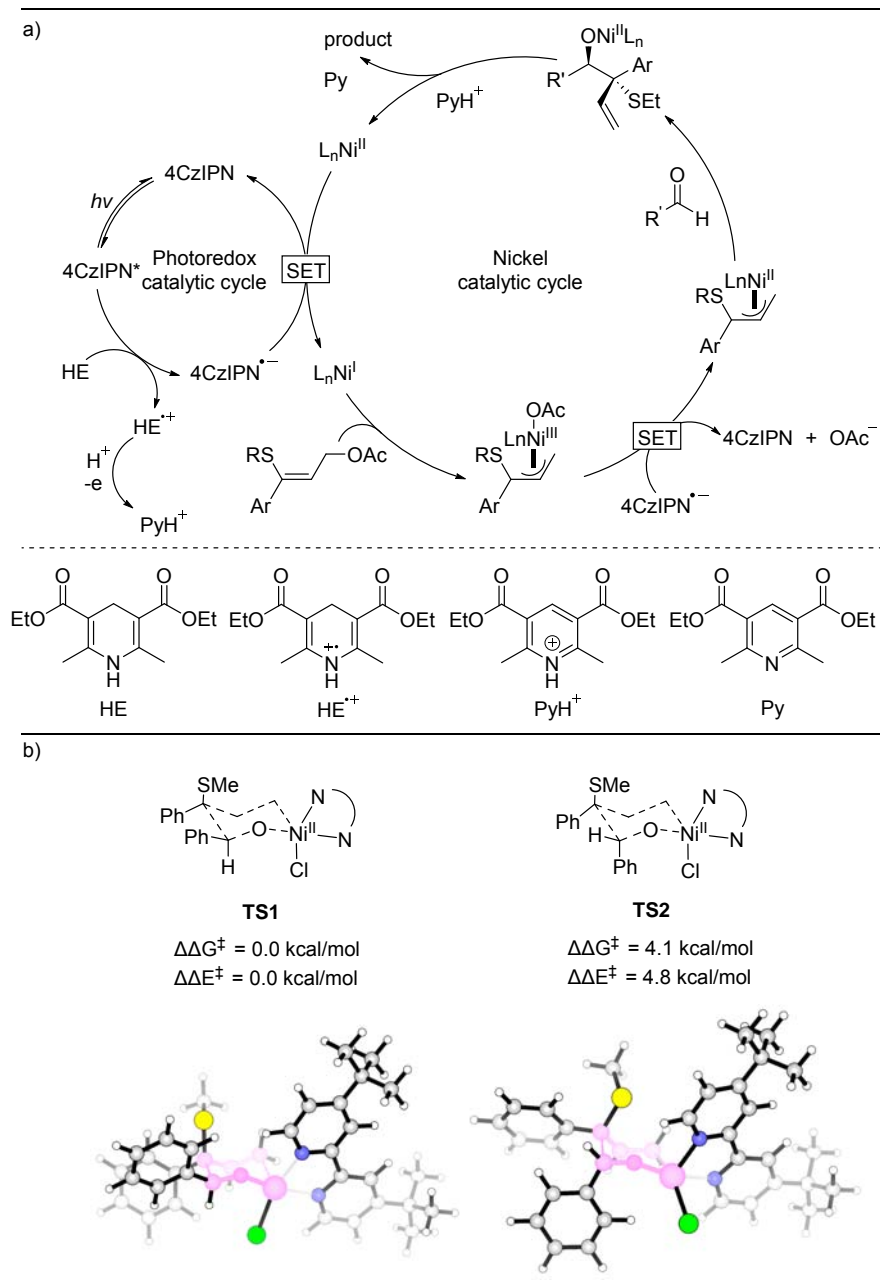

**Figure S2.** a) Proposed mechanism; b) Two stereo-determining transition states calculated at the (U)M06-D3/6-311+G(d,p) (SDD for Ni)/SMD(THF)//(U)M06-L-D3/6-31G(d) (SDD for Ni) level at 298.15 K. The six-membered rings of the chair-like transition states are labeled in pink.

### S9 Single crystal X-ray diffraction data

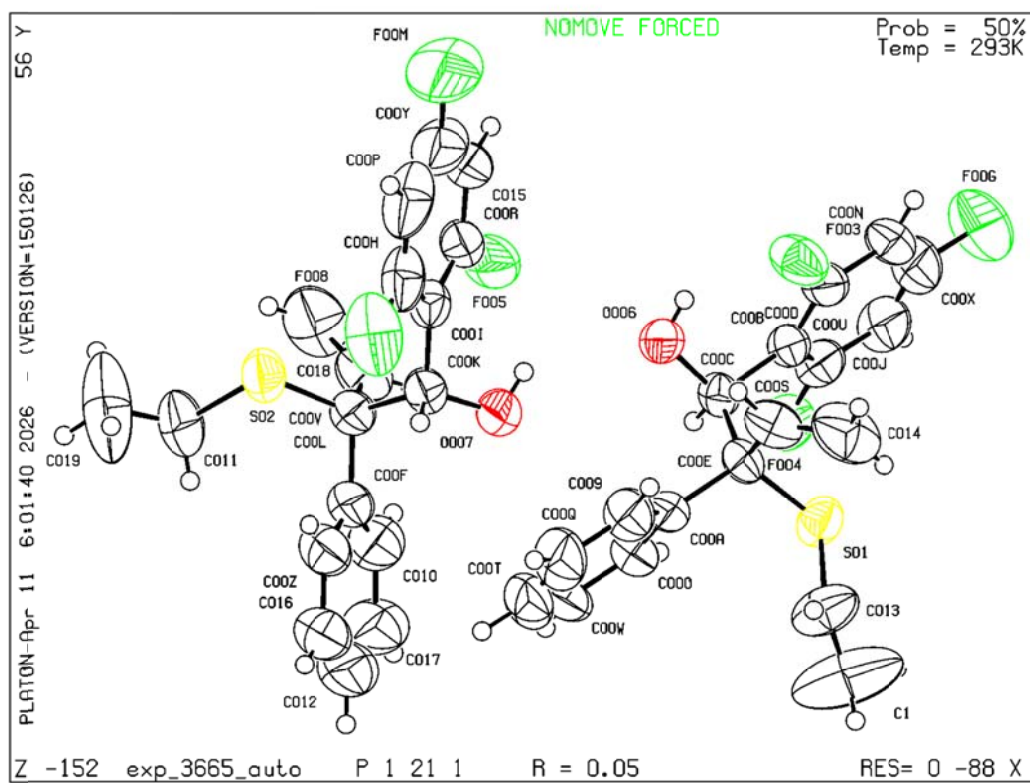

Figure S3. X-ray crystallographic analysis of **3y** (CCDC: 2545520).

**Table S8** Crystal information of product **3y** (CCDC no. 2545520)

| Identification code                         | exp_3665_auto                                                 |
|---------------------------------------------|---------------------------------------------------------------|
| Empirical formula                           | C <sub>18</sub> H <sub>17</sub> F <sub>3</sub> OS             |
| Formula weight                              | 338.38                                                        |
| Temperature/K                               | 293(2)                                                        |
| Crystal system                              | monoclinic                                                    |
| Space group                                 | P2 <sub>1</sub>                                               |
| a/Å                                         | 7.1812(2)                                                     |
| b/Å                                         | 21.2592(6)                                                    |
| c/Å                                         | 11.2046(3)                                                    |
| $\alpha$ /°                                 | 90                                                            |
| $\beta$ /°                                  | 91.832(2)                                                     |
| $\gamma$ /°                                 | 90                                                            |
| Volume/Å <sup>3</sup>                       | 1709.69(8)                                                    |
| Z                                           | 4                                                             |
| $\rho_{\text{calc}}$ /cm <sup>3</sup>       | 1.315                                                         |
| $\mu$ /mm <sup>-1</sup>                     | 1.965                                                         |
| F(000)                                      | 704.0                                                         |
| Crystal size/mm <sup>3</sup>                | 0.5 × 0.2 × 0.2                                               |
| Radiation                                   | CuK $\alpha$ ( $\lambda$ = 1.54184)                           |
| 2 $\theta$ range for data collection/°      | 7.894 to 135.958                                              |
| Index ranges                                | -6 ≤ h ≤ 8, -25 ≤ k ≤ 23, -13 ≤ l ≤ 13                        |
| Reflections collected                       | 8401                                                          |
| Independent reflections                     | 4540 [R <sub>int</sub> = 0.0384, R <sub>sigma</sub> = 0.0513] |
| Data/restraints/parameters                  | 4540/79/420                                                   |
| Goodness-of-fit on F <sup>2</sup>           | 1.090                                                         |
| Final R indexes [I >= 2 $\sigma$ (I)]       | R <sub>1</sub> = 0.0460, wR <sub>2</sub> = 0.1266             |
| Final R indexes [all data]                  | R <sub>1</sub> = 0.0500, wR <sub>2</sub> = 0.1359             |
| Largest diff. peak/hole / e Å <sup>-3</sup> | 0.22/-0.20                                                    |
| Flack parameter                             | -0.016(14)                                                    |

## S10 Computational Details

DFT calculations of the two transition states were performed in the Gaussian 16 program.<sup>[4]</sup> Geometry optimizations were performed using the pure functional M06-L (with Grimme's D3 dispersion correction) in the gas phase, with the Pople basis set 6-31G(d).<sup>[5-7]</sup> Pseudopotential basis set SDD was applied for the nickel atom.<sup>[8]</sup> Single point energy calculations were then performed using the hybrid functional M06 (with Grimme's D3 dispersion correction) with the SMD solvation model (solvent is set to tetrahydrofuran), with the Pople basis set 6-311+G(d,p).<sup>[9-10]</sup>

Gibbs free energy calculations were performed using the Goodvibes program with Grimme's quasi-harmonic entropic correction at 298.15 K.<sup>[11-12]</sup>

The 3D structures in the main text are generated using the CYLview20 program.<sup>[13]</sup>

## S11 Cartesian Coordinates

### TS1

Imaginary Frequency: -302.73 cm<sup>-1</sup>

0 3 (0 denotes the net charge; 3 denotes the multiplicity)

|    |             |             |             |
|----|-------------|-------------|-------------|
| Ni | -2.42299200 | -0.09797100 | 1.34846600  |
| C  | -0.77005600 | 0.66847000  | 0.02027500  |
| C  | -1.01155700 | -0.31902500 | -0.90464400 |
| C  | -1.92136600 | -0.27503700 | -2.02012300 |
| C  | -3.65701900 | -0.67684300 | -1.11767500 |
| O  | -3.74891300 | 0.10282000  | -0.08273900 |
| H  | -0.53226900 | -1.28214400 | -0.72083200 |
| H  | -1.09930500 | 1.68976600  | -0.16922600 |
| H  | 0.03368300  | 0.53270600  | 0.74298600  |
| C  | -4.67562900 | -0.50632200 | -2.18666000 |
| C  | -4.91654000 | -1.53517100 | -3.10502100 |
| C  | -5.41641900 | 0.67704900  | -2.28821100 |
| C  | -5.85934700 | -1.37475700 | -4.11460800 |
| C  | -6.36130400 | 0.83618600  | -3.29394400 |
| C  | -6.58169500 | -0.18769100 | -4.21464400 |
| H  | -6.93078600 | 1.76217400  | -3.36254600 |
| H  | -3.38351000 | -1.72932100 | -0.93210600 |
| C  | -1.77513200 | -1.37606300 | -3.01606200 |
| C  | -1.91589800 | -1.17847100 | -4.39556900 |
| C  | -1.58475100 | -2.69347000 | -2.55852000 |
| C  | -1.84985600 | -2.24731200 | -5.28493800 |
| H  | -2.11106200 | -0.17377000 | -4.76715100 |
| C  | -1.52057800 | -3.75905200 | -3.44885000 |
| H  | -1.52611200 | -2.89158200 | -1.48659200 |
| C  | -1.64903200 | -3.54360900 | -4.82004200 |
| H  | -1.38252000 | -4.76840400 | -3.06364000 |
| H  | -5.23657800 | 1.46730000  | -1.56155400 |
| H  | -4.35634100 | -2.46622000 | -3.02154900 |
| H  | -1.96504200 | -2.06150200 | -6.35214300 |
| H  | -1.60242200 | -4.37935100 | -5.51626200 |
| C  | -2.25153600 | 2.34544400  | 3.03010700  |
| C  | -2.37573600 | 3.67770100  | 3.41209500  |
| C  | -3.14678600 | 4.56881600  | 2.65839200  |
| C  | -3.76428800 | 4.05095500  | 1.51766300  |
| C  | -3.59572200 | 2.71192300  | 1.18481700  |
| C  | -1.44073500 | 1.35214400  | 3.75842600  |
| C  | -0.80992700 | 1.61208000  | 4.97090000  |
| C  | -0.04309000 | 0.62905500  | 5.60497300  |
| C  | 0.04511800  | -0.60520700 | 4.95827800  |
| C  | -0.61918600 | -0.80704000 | 3.75370200  |

|    |             |             |             |
|----|-------------|-------------|-------------|
| H  | -1.85714700 | 4.03435500  | 4.29994000  |
| H  | -4.37344500 | 4.67722600  | 0.87234700  |
| H  | -4.03550100 | 2.26092300  | 0.29638900  |
| H  | -0.92269100 | 2.58914700  | 5.43677900  |
| H  | 0.61914700  | -1.42427300 | 5.38204500  |
| H  | -0.60189200 | -1.76112800 | 3.22622100  |
| N  | -2.86644200 | 1.87384400  | 1.92480600  |
| N  | -1.34515800 | 0.14343100  | 3.15988200  |
| C  | -3.26879300 | 6.02422400  | 3.09254700  |
| C  | 0.63324000  | 0.93152100  | 6.93619900  |
| C  | -1.87018100 | 6.65558900  | 3.12532200  |
| H  | -1.20359900 | 6.13960600  | 3.82694200  |
| H  | -1.93591700 | 7.70372100  | 3.44249000  |
| H  | -1.39768400 | 6.63124500  | 2.13595800  |
| C  | -3.88191600 | 6.07657900  | 4.49865900  |
| H  | -4.88291900 | 5.62896000  | 4.51525500  |
| H  | -3.97194200 | 7.11741500  | 4.83338900  |
| H  | -3.26596400 | 5.54528700  | 5.23435400  |
| C  | -4.14990700 | 6.83294800  | 2.14267900  |
| H  | -5.17209300 | 6.43781700  | 2.09498500  |
| H  | -3.74426400 | 6.85316600  | 1.12374200  |
| H  | -4.21528700 | 7.87050900  | 2.48997800  |
| C  | -0.44317600 | 1.29060000  | 7.97002900  |
| H  | -1.02404100 | 2.17055200  | 7.66810800  |
| H  | 0.02221700  | 1.51744900  | 8.93723800  |
| H  | -1.14562300 | 0.46185500  | 8.11939400  |
| C  | 1.58333300  | 2.12347200  | 6.75795700  |
| H  | 2.36576900  | 1.90444800  | 6.02133500  |
| H  | 2.07346700  | 2.36167300  | 7.71002300  |
| H  | 1.05356400  | 3.02433300  | 6.42529500  |
| C  | 1.43396800  | -0.26105500 | 7.45512100  |
| H  | 2.23179800  | -0.55271300 | 6.76099900  |
| H  | 0.79786800  | -1.13718600 | 7.63085800  |
| H  | 1.90737400  | -0.00336100 | 8.40952900  |
| Cl | -2.21148700 | -2.39269700 | 1.36156800  |
| H  | -7.32125700 | -0.06250700 | -5.00424300 |
| H  | -6.03209700 | -2.18235000 | -4.82441400 |
| S  | -2.23553900 | 1.39285100  | -2.65788800 |
| C  | -0.55797700 | 1.84321700  | -3.17873700 |
| H  | -0.60157400 | 2.84809300  | -3.61013800 |
| H  | -0.18550000 | 1.14829100  | -3.94043700 |
| H  | 0.13471500  | 1.84994200  | -2.32883800 |

## TS2

Imaginary Frequency: -319.73 cm<sup>-1</sup>

0 3 (0 denotes the net charge; 3 denotes the multiplicity)

|    |             |             |             |
|----|-------------|-------------|-------------|
| Ni | 1.84961400  | -1.37894300 | -1.11138400 |
| C  | 0.27689600  | -2.17043300 | -2.68857100 |
| C  | -0.94573400 | -1.88903200 | -2.14089200 |
| C  | -1.54261400 | -0.59761200 | -1.97897300 |
| C  | -0.68282700 | -0.11361000 | -0.20650300 |
| O  | 0.58156200  | -0.02069300 | -0.45219800 |
| H  | -1.43496000 | -2.69848100 | -1.59188700 |
| H  | 0.73288100  | -1.47479200 | -3.39508600 |
| H  | 0.60848800  | -3.20647200 | -2.73647900 |
| C  | -1.21493500 | -1.11436200 | 0.75701300  |
| C  | -2.51158600 | -0.97212400 | 1.26757000  |
| C  | -0.44792000 | -2.21061600 | 1.16781500  |
| C  | -3.04334200 | -1.92199300 | 2.13251300  |
| C  | -0.97792800 | -3.15836700 | 2.03706000  |
| C  | -2.28064500 | -3.02392700 | 2.51415000  |
| H  | -0.36091600 | -3.99649200 | 2.35743900  |
| C  | -3.00428000 | -0.47723900 | -1.76169300 |
| C  | -3.59397800 | 0.78757700  | -1.58428000 |
| C  | -3.84146600 | -1.59898500 | -1.64315900 |
| C  | -4.94156000 | 0.92190600  | -1.27435200 |
| H  | -2.96647400 | 1.67282100  | -1.68707900 |
| C  | -5.18952900 | -1.46453200 | -1.32727500 |
| H  | -3.43848800 | -2.59803000 | -1.79519300 |
| C  | -5.74998700 | -0.20513900 | -1.13486800 |
| H  | -5.80701900 | -2.35701900 | -1.23576900 |
| H  | 0.59258000  | -2.29338700 | 0.85182200  |
| H  | -3.10969400 | -0.10967000 | 0.97308100  |
| H  | -5.36310700 | 1.91684400  | -1.13727900 |
| H  | -6.80572800 | -0.10153100 | -0.89112100 |
| C  | 3.75955300  | -0.42580600 | -3.11092800 |
| C  | 4.42271800  | 0.44281700  | -3.97121300 |
| C  | 4.13153200  | 1.81095700  | -3.96963500 |
| C  | 3.15545100  | 2.24249100  | -3.06968400 |
| C  | 2.51689600  | 1.32394200  | -2.24439900 |
| C  | 4.02276000  | -1.87376300 | -3.03788100 |
| C  | 5.06320000  | -2.50728300 | -3.71237000 |
| C  | 5.27656300  | -3.88107500 | -3.57170900 |
| C  | 4.40196400  | -4.56590800 | -2.72404900 |
| C  | 3.39032300  | -3.87109200 | -2.07431300 |
| H  | 5.17047900  | 0.05201200  | -4.65859300 |
| H  | 2.87198400  | 3.28883400  | -3.00337200 |
| H  | 1.73475300  | 1.60380400  | -1.54142700 |
| H  | 5.73049100  | -1.92103200 | -4.34120800 |

|    |             |             |             |
|----|-------------|-------------|-------------|
| H  | 4.50383300  | -5.63299500 | -2.54926400 |
| H  | 2.71180000  | -4.37105000 | -1.38390000 |
| N  | 2.80852500  | 0.02284400  | -2.26378300 |
| N  | 3.19083000  | -2.56352500 | -2.23052300 |
| C  | 4.86584600  | 2.74494700  | -4.92367000 |
| C  | 6.42707900  | -4.55331800 | -4.31069000 |
| C  | 4.60464900  | 2.29143900  | -6.36655500 |
| H  | 4.95676500  | 1.26822900  | -6.54508000 |
| H  | 5.12968600  | 2.94885600  | -7.07071400 |
| H  | 3.53519800  | 2.32334700  | -6.60759000 |
| C  | 6.37130300  | 2.67416600  | -4.63386400 |
| H  | 6.59539800  | 2.98683700  | -3.60697200 |
| H  | 6.91960700  | 3.33566100  | -5.31613900 |
| H  | 6.76704200  | 1.66005500  | -4.76762500 |
| C  | 4.40468500  | 4.19326500  | -4.77453700 |
| H  | 4.58987900  | 4.58075400  | -3.76522300 |
| H  | 3.33565400  | 4.30731300  | -4.99255900 |
| H  | 4.95302300  | 4.83183800  | -5.47677300 |
| C  | 7.74851300  | -3.91300200 | -3.86384200 |
| H  | 7.77813100  | -2.83890200 | -4.08289600 |
| H  | 8.59121900  | -4.38087000 | -4.38789000 |
| H  | 7.90828500  | -4.03760800 | -2.78628100 |
| C  | 6.24483400  | -4.34222400 | -5.81983100 |
| H  | 5.30689100  | -4.78595700 | -6.17530600 |
| H  | 7.06990700  | -4.81146500 | -6.36995100 |
| H  | 6.23334300  | -3.27838900 | -6.08627400 |
| C  | 6.48928100  | -6.05319100 | -4.02909000 |
| H  | 5.57404900  | -6.56851000 | -4.34614100 |
| H  | 6.64862900  | -6.26411700 | -2.96450700 |
| H  | 7.32478000  | -6.50015600 | -4.58008700 |
| H  | -1.22467400 | 0.85065700  | -0.17043000 |
| Cl | 3.16003200  | -1.80245400 | 0.70823400  |
| H  | -2.69365400 | -3.76606100 | 3.19581400  |
| H  | -4.05725300 | -1.79821500 | 2.51065200  |
| S  | -0.79199600 | 0.73111500  | -2.96673900 |
| C  | -1.78510700 | 0.57211400  | -4.47389600 |
| H  | -1.42798700 | 1.32061100  | -5.18776700 |
| H  | -2.84643700 | 0.75575000  | -4.26904700 |
| H  | -1.66974300 | -0.42374300 | -4.91652800 |

## S12 Characterization data of Products

### 2-(ethylthio)-1-(naphthalen-2-yl)-2-phenylbut-3-en-1-ol (3a)

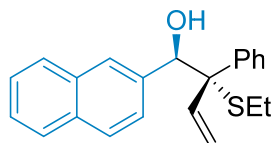

Prepared according to the general procedure and purified by silica gel flash column chromatograph (EA/PE = 1/20) to give **3a** as colorless oil (57 mg, 85%, d.r. = 12:1).

$R_f$  = 0.4 (EA/PE = 1/10)

$^1\text{H NMR}$  (400 MHz,  $\text{CDCl}_3$ )  $\delta$  7.80 – 7.74 (m, 1H), 7.75 – 7.68 (m, 1H), 7.62 (d,  $J$  = 8.6 Hz, 1H), 7.53 (s, 1H), 7.45 – 7.42 (m, 4H), 7.28 (d,  $J$  = 4.9 Hz, 3H), 7.11 (d,  $J$  = 8.5 Hz, 1H), 6.42 (dd,  $J$  = 17.4, 10.8 Hz, 1H), 5.45 (d,  $J$  = 10.8 Hz, 1H), 5.29 (dd,  $J$  = 10.7, 7.5 Hz, 2H), 2.86 (s, 1H), 2.28 (dq,  $J$  = 11.5, 7.6 Hz, 1H), 2.13 (dq,  $J$  = 11.4, 7.6 Hz, 1H), 1.12 (t,  $J$  = 7.5 Hz, 3H).

$^{13}\text{C NMR}$  (101 MHz,  $\text{CDCl}_3$ )  $\delta$  139.0, 136.5, 136.4, 133.0, 132.4, 129.7, 128.1, 127.9, 127.7, 127.5, 127.3, 126.4, 126.2, 125.9, 125.7, 117.9, 79.5, 65.6, 23.9, 13.6.

HRMS-ESI<sup>+</sup> (m/z) [M-OH]<sup>+</sup> calculated for  $\text{C}_{22}\text{H}_{21}\text{S}$ , 317.1358, found: 317.1357.

### 2-(ethylthio)-1,2-diphenylbut-3-en-1-ol (3b)

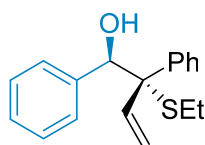

Prepared according to the general procedure and purified by silica gel flash column chromatograph (EA/PE = 1/20) to give **3b** as colorless oil (52 mg, 92%, d.r. > 20:1).

$R_f$  = 0.4 (EA/PE = 1/10)

$^1\text{H NMR}$  (400 MHz,  $\text{CDCl}_3$ )  $\delta$  7.48 (d,  $J$  = 6.9 Hz, 2H), 7.30 (q,  $J$  = 7.0 Hz, 3H), 7.25 – 7.14 (m, 3H), 7.07 (d,  $J$  = 7.1 Hz, 2H), 6.38 (dd,  $J$  = 17.4, 10.8 Hz, 1H), 5.46 (d,  $J$  = 10.8 Hz, 1H), 5.30 (d,  $J$  = 17.4 Hz, 1H), 5.15 (d,  $J$  = 3.5 Hz, 1H), 2.74 (d,  $J$  = 3.6 Hz, 1H), 2.27 (dq,  $J$  = 11.6, 7.6 Hz, 1H), 2.12 (dq,  $J$  = 11.5, 7.4 Hz, 1H), 1.13 (t,  $J$  = 7.5 Hz, 3H).

$^{13}\text{C NMR}$  (101 MHz,  $\text{CDCl}_3$ )  $\delta$  139.1, 138.9, 136.4, 129.6, 128.3, 127.8, 127.8, 127.2, 127.1, 117.8, 79.4, 65.4, 23.8, 13.6.

HRMS-ESI<sup>+</sup> (m/z) [M-OH]<sup>+</sup> calculated for  $\text{C}_{18}\text{H}_{19}\text{S}$ , 267.1202, found: 267.1200.

### 2-(ethylthio)-1-(4-fluorophenyl)-2-phenylbut-3-en-1-ol (3c)

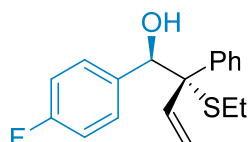

Prepared according to the general procedure and purified by silica gel flash column chromatograph (EA/PE = 1/20) to give **3c** as colorless oil (50 mg, 83%, d.r. > 20:1).

$R_f$  = 0.4 (EA/PE = 1/10)

**<sup>1</sup>H NMR (400 MHz, CDCl<sub>3</sub>)** δ 7.43 (dd, *J* = 6.7, 2H), 7.29 (d, *J* = 8.2 Hz, 4H), 7.25 – 7.11 (m, 1H), 6.99 – 6.87 (m, 2H), 6.31 (dd, *J* = 17.4, 10.8 Hz, 1H), 5.45 (d, *J* = 10.8 Hz, 1H), 5.28 (d, *J* = 17.4 Hz, 1H), 5.09 (d, *J* = 3.4 Hz, 1H), 2.75 (d, *J* = 3.4 Hz, 1H), 2.25 (dq, *J* = 11.6, 7.5 Hz, 1H), 2.09 (dq, *J* = 11.6, 7.4 Hz, 1H), 1.11 (t, *J* = 7.5 Hz, 3H).

**<sup>13</sup>C NMR (101 MHz, CDCl<sub>3</sub>)** δ 138.7, 137.8, 136.1, 130.2, 130.0, 129.5, 128.4(d, *J* = 241.4 Hz), 128.0, 127.5, 121.8, 118.1, 78.7, 65.2, 23.9, 13.6.

**<sup>19</sup>F NMR (377 MHz, CDCl<sub>3</sub>)** δ -114.56.

**HRMS-ESI<sup>+</sup>** (*m/z*) [M-OH]<sup>+</sup> calculated for C<sub>18</sub>H<sub>18</sub>FS, 285.1108, found: 285.1107.

### 1-(4-chlorophenyl)-2-(ethylthio)-2-phenylbut-3-en-1-ol (3d)

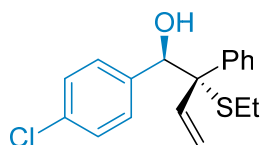

Prepared according to the general procedure and purified by silica gel flash column chromatograph (EA/PE = 1/20) to give **3d** as colorless oil (48 mg, 75%, d.r. > 20:1).

**R<sub>f</sub>** = 0.4 (EA/PE = 1/10)

**<sup>1</sup>H NMR (400 MHz, CDCl<sub>3</sub>)** δ 7.43 (d, *J* = 6.9 Hz, 2H), 7.34 – 7.22 (m, 3H), 7.14 (d, *J* = 8.5 Hz, 2H), 6.97 (d, *J* = 8.4 Hz, 2H), 6.32 (dd, *J* = 17.3, 10.7 Hz, 1H), 5.45 (d, *J* = 10.8 Hz, 1H), 5.29 (d, *J* = 17.3 Hz, 1H), 5.10 (d, *J* = 3.4 Hz, 1H), 2.75 (d, *J* = 3.4 Hz, 1H), 2.25 (dq, *J* = 11.4, 7.5 Hz, 1H), 2.10 (dq, *J* = 11.5, 7.5 Hz, 1H), 1.11 (t, *J* = 7.5 Hz, 3H).

**<sup>13</sup>C NMR (101 MHz, CDCl<sub>3</sub>)** δ 138.8, 137.3, 136.2, 133.6, 129.6, 129.5, 128.0, 127.4, 127.3, 118.1, 78.7, 65.3, 23.9, 13.6.

**HRMS-ESI<sup>+</sup>** (*m/z*) [M-OH]<sup>+</sup> calculated for C<sub>18</sub>H<sub>18</sub>ClS, 301.0812, found: 301.0810.

### 1-(4-bromophenyl)-2-(ethylthio)-2-phenylbut-3-en-1-ol (3e)

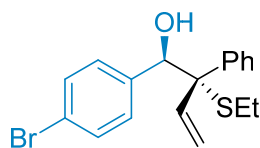

Prepared according to the general procedure and purified by silica gel flash column chromatograph (EA/PE = 1/20) to give **3e** as colorless oil (44 mg, 60%, d.r. > 20:1).

**R<sub>f</sub>** = 0.4 (EA/PE = 1/10)

**<sup>1</sup>H NMR (400 MHz, CDCl<sub>3</sub>)** δ 7.47 (d, *J* = 7.6 Hz, 2H), 7.33 – 7.27 (m, 2H), 7.25 – 7.16 (m, 3H), 7.07 (d, *J* = 6.8 Hz, 2H), 6.38 (dd, *J* = 17.4, 10.8 Hz, 1H), 5.46 (d, *J* = 10.8 Hz, 1H), 5.30 (d, *J* = 17.2 Hz, 1H), 5.15 (d, *J* = 3.3 Hz, 1H), 2.74 (d, *J* = 3.5 Hz, 1H), 2.27 (dq, *J* = 11.6, 7.5 Hz, 1H), 2.12 (dq, *J* = 11.6, 7.5 Hz, 1H), 1.13 (t, *J* = 7.5 Hz, 3H).

**<sup>13</sup>C NMR (101 MHz, CDCl<sub>3</sub>)** δ 139.0, 138.8, 136.4, 129.6, 128.3, 127.8, 127.8, 127.3, 127.1, 117.8, 79.4, 65.4, 23.8, 13.6.

**HRMS-ESI<sup>+</sup>** (*m/z*) [M-OH]<sup>+</sup> calculated for C<sub>18</sub>H<sub>18</sub>BrS, 345.0307, found: 345.0307.

### 2-(ethylthio)-2-phenyl-1-(4-(trifluoromethyl)phenyl)but-3-en-1-ol (3f)

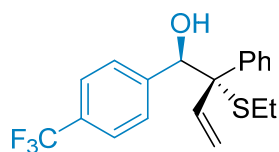

Prepared according to the general procedure and purified by silica gel flash column chromatograph (EA/PE = 1/20) to give **3f** as a white solid (55 mg, 78%, d.r. > 20:1).

$R_f$  = 0.4 (EA/PE = 1/10)

$^1\text{H NMR}$  (400 MHz,  $\text{CDCl}_3$ )  $\delta$  7.42 (d,  $J$  = 7.0 Hz, 4H), 7.35 – 7.24 (m, 3H), 7.15 (d,  $J$  = 8.1 Hz, 2H), 6.33 (dd,  $J$  = 17.3, 10.7 Hz, 1H), 5.46 (d,  $J$  = 10.8 Hz, 1H), 5.29 (d,  $J$  = 17.4 Hz, 1H), 5.18 (d,  $J$  = 3.5 Hz, 1H), 2.83 (d,  $J$  = 3.4 Hz, 1H), 2.26 (dq,  $J$  = 11.4, 7.5 Hz, 1H), 2.11 (dq,  $J$  = 11.4, 7.5 Hz, 1H), 1.11 (t,  $J$  = 7.4 Hz, 3H).

$^{13}\text{C NMR}$  (101 MHz,  $\text{CDCl}_3$ )  $\delta$  142.8, 138.6, 136.0, 129.8 (d,  $J$  = 26.3 Hz), 129.4, 128.6, 128.1, 127.6, 124.1 (d,  $J$  = 218.2 Hz), 124.0 (q,  $J$  = 3.0 Hz), 118.3, 78.7, 65.2, 23.9, 13.6.

$^{19}\text{F NMR}$  (377 MHz,  $\text{CDCl}_3$ )  $\delta$  -62.48.

HRMS-ESI<sup>+</sup> (m/z) [M-OH]<sup>+</sup> calculated for  $\text{C}_{19}\text{H}_{18}\text{F}_3\text{S}$ , 335.1076, found: 335.1074.

### 2-(ethylthio)-1-(2-fluorophenyl)-2-phenylbut-3-en-1-ol (3g)

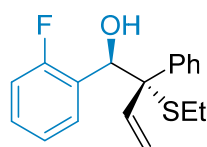

Prepared according to the general procedure and purified by silica gel flash column chromatograph (EA/PE = 1/20) to give **3g** as colorless oil (48 mg, 79%, d.r. > 20:1).

$R_f$  = 0.4 (EA/PE = 1/10)

$^1\text{H NMR}$  (400 MHz,  $\text{CDCl}_3$ )  $\delta$  7.46 (d,  $J$  = 8.0 Hz, 2H), 7.33 – 7.22 (m, 3H), 7.25 – 7.15 (m, 1H), 6.98 – 6.85 (m, 3H), 6.32 (dd,  $J$  = 17.4, 10.9 Hz, 1H), 5.53 (d,  $J$  = 4.0 Hz, 1H), 5.45 (d,  $J$  = 10.8 Hz, 1H), 5.32 (d,  $J$  = 17.4 Hz, 1H), 2.81 (d,  $J$  = 4.0 Hz, 1H), 2.34 – 2.26 (m, 1H), 2.25 – 2.17 (m, 1H), 1.13 (t,  $J$  = 7.5 Hz, 3H).

$^{13}\text{C NMR}$  (101 MHz,  $\text{CDCl}_3$ )  $\delta$  160.2 (d,  $J$  = 197.6 Hz), 138.4, 136.2 (d,  $J$  = 1.7 Hz), 130.2 (d,  $J$  = 2.8 Hz), 129.7, 129.3 (d,  $J$  = 6.9 Hz), 127.7, 127.4, 126.3 (d,  $J$  = 9.5 Hz), 123.0 (d,  $J$  = 2.8 Hz), 117.9, 114.6 (d,  $J$  = 18.6 Hz), 71.4, 65.4, 23.7, 13.5.

$^{19}\text{F NMR}$  (377 MHz,  $\text{CDCl}_3$ )  $\delta$  -115.08.

HRMS-ESI<sup>+</sup> (m/z) [M-OH]<sup>+</sup> calculated for  $\text{C}_{18}\text{H}_{18}\text{FS}$ , 285.1108, found: 285.1107.

### 2-(ethylthio)-2-phenyl-1-(o-tolyl)but-3-en-1-ol (3h)

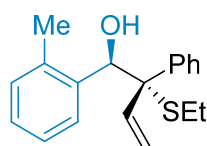

Prepared according to the general procedure and purified by silica gel flash column chromatograph (EA/PE = 1/20) to give **3h** as colorless oil (45 mg, 76%, d.r. > 20:1).

$R_f = 0.4$  (EA/PE = 1/10)

$^1\text{H NMR}$  (400 MHz,  $\text{CDCl}_3$ )  $\delta$  7.54 (d,  $J = 7.0$  Hz, 2H), 7.36 – 7.26 (m, 3H), 7.24 – 7.14 (m, 2H), 7.14 – 7.05 (m, 2H), 6.42 (dd,  $J = 17.6, 10.4$  Hz, 1H), 5.58 (d,  $J = 2.3$  Hz, 1H), 5.55 (d,  $J = 2.0$  Hz, 1H), 5.46 (d,  $J = 3.3$  Hz, 1H), 2.51 (d,  $J = 3.2$  Hz, 1H), 2.27 (s, 3H), 2.23 (dq,  $J = 11.6, 7.5$  Hz, 1H), 2.05 (dq,  $J = 11.5, 7.5$  Hz, 1H), 1.10 (t,  $J = 7.5$  Hz, 3H).

$^{13}\text{C NMR}$  (101 MHz,  $\text{CDCl}_3$ )  $\delta$  140.1, 137.5, 136.6, 136.4, 129.9, 129.4, 128.7, 127.9, 127.8, 127.2, 125.1, 118.4, 74.8, 65.4, 23.9, 20.2, 13.7.

HRMS-ESI $^+$  (m/z)  $[\text{M}-\text{OH}]^+$  calculated for  $\text{C}_{19}\text{H}_{21}\text{S}$ , 281.1358, found: 281.1358.

### 1-(3-bromophenyl)-2-(ethylthio)-2-phenylbut-3-en-1-ol (**3i**)

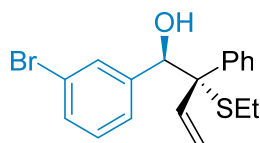

Prepared according to the general procedure and purified by silica gel flash column chromatograph (EA/PE = 1/20) to give **3i** as colorless oil (54 mg, 74%, d.r. = 5:1).

$R_f = 0.4$  (EA/PE = 1/10)

$^1\text{H NMR}$  (400 MHz,  $\text{CDCl}_3$ )  $\delta$  7.42 (d,  $J = 7.4$  Hz, 2H), 7.31 (dt,  $J = 15.1, 7.4$  Hz, 4H), 7.13 (s, 1H), 7.04 (t,  $J = 7.9$  Hz, 1H), 6.98 (d,  $J = 7.8$  Hz, 1H), 6.32 (dd,  $J = 17.2, 10.8$  Hz, 1H), 5.47 (d,  $J = 10.8$  Hz, 1H), 5.29 (d,  $J = 17.3$  Hz, 1H), 5.08 (d,  $J = 3.4$  Hz, 1H), 2.79 (d,  $J = 3.4$  Hz, 1H), 2.24 (dq,  $J = 11.4, 7.4$  Hz, 1H), 2.11 (dq,  $J = 11.2, 7.4$  Hz, 1H), 1.12 (t,  $J = 7.4$  Hz, 3H).

$^{13}\text{C NMR}$  (101 MHz,  $\text{CDCl}_3$ )  $\delta$  141.1, 138.6, 136.0, 131.4, 130.8, 129.5, 128.5, 128.0, 127.5, 126.9, 121.2, 118.2, 78.6, 65.2, 23.9, 13.6.

HRMS-ESI $^+$  (m/z)  $[\text{M}-\text{OH}]^+$  calculated for  $\text{C}_{18}\text{H}_{18}\text{BrS}$ , 345.0307, found: 345.0304.

### 2-(ethylthio)-1-(3-methoxyphenyl)-2-phenylbut-3-en-1-ol (**3j**)

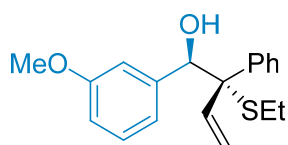

Prepared according to the general procedure and purified by silica gel flash column chromatograph (EA/PE = 1/20) to give **3j** as colorless oil (48 mg, 76%, d.r. > 20:1).

$R_f = 0.3$  (EA/PE = 1/10)

$^1\text{H NMR}$  (500 MHz,  $\text{CDCl}_3$ )  $\delta$  7.45 (d,  $J = 7.9$  Hz, 2H), 7.32 – 7.26 (m, 3H), 7.12 – 7.08 (m, 1H), 6.75 (d,  $J = 8.2$  Hz, 1H), 6.70 (d,  $J = 7.6$  Hz, 1H), 6.46 (s, 1H), 6.34 (dd,  $J = 17.4, 10.8$  Hz, 1H), 5.44 (d,  $J = 10.8$  Hz, 1H), 5.30 (d,  $J = 17.4$  Hz, 1H), 5.08 (s, 1H), 3.61 (s, 3H), 2.78 (s, 1H), 2.31 – 2.23 (m, 1H), 2.17 – 2.10 (m, 1H), 1.13 (t,  $J = 7.5$  Hz, 3H).

$^{13}\text{C NMR}$  (126 MHz,  $\text{CDCl}_3$ )  $\delta$  158.5, 140.4, 139.0, 136.6, 129.7, 128.0, 127.8, 127.3, 120.8, 117.7, 114.0, 113.3, 79.1, 65.4, 55.0, 23.9, 13.6.

HRMS-ESI $^+$  (m/z)  $[\text{M}+\text{Na}]^+$  calculated for  $\text{C}_{19}\text{H}_{22}\text{O}_2\text{SNa}$ , 337.1233, found: 337.1228.

### 1-(2,4-dichlorophenyl)-2-(ethylthio)-2-phenylbut-3-en-1-ol (3k)

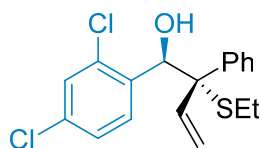

Prepared according to the general procedure and purified by silica gel flash column chromatograph (EA/PE = 1/20) to give **3k** as colorless oil (54 mg, 77%, d.r. = 13:1).

$R_f$  = 0.4 (EA/PE = 1/10)

$^1\text{H NMR}$  (400 MHz,  $\text{CDCl}_3$ )  $\delta$  7.46 (d,  $J$  = 6.3 Hz, 2H), 7.33 – 7.26 (m, 4H), 7.06 (d,  $J$  = 8.6 Hz, 1H), 6.96 (d,  $J$  = 8.6 Hz, 1H), 6.35 (dd,  $J$  = 17.2, 10.8 Hz, 1H), 5.67 (d,  $J$  = 3.2 Hz, 1H), 5.52 (d,  $J$  = 10.8 Hz, 1H), 5.45 (d,  $J$  = 17.2 Hz, 1H), 2.77 (d,  $J$  = 3.2 Hz, 1H), 2.29 (dq,  $J$  = 11.5, 7.5 Hz, 1H), 2.17 (dq,  $J$  = 11.5, 7.4 Hz, 1H), 1.11 (t,  $J$  = 7.5 Hz, 3H).

$^{13}\text{C NMR}$  (101 MHz,  $\text{CDCl}_3$ )  $\delta$  138.8, 135.9, 135.4, 134.7, 134.1, 131.7, 129.6, 128.6, 127.9, 127.5, 126.2, 118.7, 73.6, 65.4, 23.9, 13.6.

HRMS-ESI $^+$  (m/z)  $[\text{M}-\text{OH}]^+$  calculated for  $\text{C}_{18}\text{H}_{17}\text{Cl}_2\text{S}$ , 335.0423, found: 335.0419.

### 2-(ethylthio)-2-phenyl-1-(p-tolyl)but-3-en-1-ol (3l)

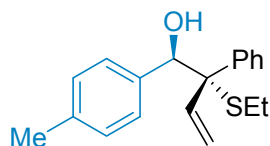

Prepared according to the general procedure and purified by silica gel flash column chromatograph (EA/PE = 1/20) to give **3l** as colorless oil (48 mg, 80%, d.r. > 20:1).

$R_f$  = 0.4 (EA/PE = 1/10)

$^1\text{H NMR}$  (400 MHz,  $\text{CDCl}_3$ )  $\delta$  7.48 (d,  $J$  = 7.3 Hz, 2H), 7.34 – 7.22 (m, 3H), 6.96 (dd,  $J$  = 21.4, 8.0 Hz, 4H), 6.37 (dd,  $J$  = 17.3, 10.8 Hz, 1H), 5.44 (d,  $J$  = 10.8 Hz, 1H), 5.28 (d,  $J$  = 17.4 Hz, 1H), 5.11 (d,  $J$  = 3.4 Hz, 1H), 2.63 (d,  $J$  = 3.5 Hz, 1H), 2.29 (s, 3H), 2.23 (dq,  $J$  = 11.6, 7.5 Hz, 1H), 2.08 (dq,  $J$  = 11.6, 7.5 Hz, 1H), 1.10 (t,  $J$  = 7.5 Hz, 3H).

$^{13}\text{C NMR}$  (101 MHz,  $\text{CDCl}_3$ )  $\delta$  139.2, 137.5, 136.4, 135.9, 129.6, 128.2, 127.9, 127.8, 127.2, 117.8, 79.4, 65.3, 23.8, 21.2, 13.6.

HRMS-ESI $^+$  (m/z)  $[\text{M}-\text{OH}]^+$  calculated for  $\text{C}_{19}\text{H}_{21}\text{S}$ , 281.1358, found: 281.1358.

### 2-(ethylthio)-1-(4-methoxyphenyl)-2-phenylbut-3-en-1-ol (3m)

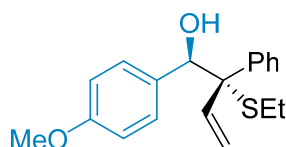

Prepared according to the general procedure and purified by silica gel flash column chromatograph (EA/PE = 1/20) to give **3m** as colorless oil (47 mg, 75%, d.r. > 20:1).

$R_f$  = 0.4 (EA/PE = 1/10)

$^1\text{H NMR}$  (400 MHz,  $\text{CDCl}_3$ )  $\delta$  7.46 (d,  $J$  = 6.9 Hz, 2H), 7.34 – 7.21 (m, 3H), 6.97 (d,  $J$  = 8.8 Hz, 2H), 6.72 (d,  $J$  = 8.8 Hz, 2H), 6.35 (dd,  $J$  = 17.4, 10.8 Hz, 1H), 5.44 (d,  $J$  = 10.8 Hz, 1H), 5.29 (d,  $J$  = 17.4

Hz, 1H), 5.09 (d,  $J = 3.3$  Hz, 1H), 3.76 (s, 3H), 2.64 (d,  $J = 3.3$  Hz, 1H), 2.24 (dq,  $J = 11.6, 7.5$  Hz, 1H), 2.09 (dq,  $J = 11.5, 7.5$  Hz, 1H), 1.10 (t,  $J = 7.5$  Hz, 3H).

$^{13}\text{C}$  NMR (101 MHz,  $\text{CDCl}_3$ )  $\delta$  159.2, 139.2, 136.5, 131.0, 129.6, 129.5, 127.8, 127.2, 117.8, 112.5, 79.1, 65.5, 55.1, 23.9, 13.6.

HRMS-ESI<sup>+</sup> (m/z)  $[\text{M}-\text{OH}]^+$  calculated for  $\text{C}_{19}\text{H}_{21}\text{OS}$ , 297.1308, found: 297.1307.

### 1-(3,4-dimethoxyphenyl)-2-(ethylthio)-2-phenylbut-3-en-1-ol (3n)

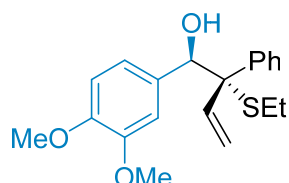

Prepared according to the general procedure and purified by silica gel flash column chromatograph (EA/PE = 1/20) to give **3n** as white solid (50 mg, 73%, d.r. > 20:1).

$R_f = 0.3$  (EA/PE = 1/4)

$^1\text{H}$  NMR (500 MHz,  $\text{CDCl}_3$ )  $\delta$  7.44 (d,  $J = 7.1$  Hz, 2H), 7.30 – 7.27 (m, 3H), 6.77 – 6.68 (m, 2H), 6.32 (dd,  $J = 17.4, 10.8$  Hz, 1H), 6.26 (d,  $J = 1.4$  Hz, 1H), 5.44 (d,  $J = 10.8$  Hz, 1H), 5.31 (d,  $J = 17.5$  Hz, 1H), 5.03 (s, 1H), 3.83 (s, 3H), 3.56 (s, 3H), 2.88 (s, 1H), 2.30 (dq,  $J = 11.5, 7.5$  Hz, 1H), 2.16 (dq,  $J = 11.6, 7.5$  Hz, 1H), 1.14 (t,  $J = 7.5$  Hz, 3H).

$^{13}\text{C}$  NMR (126 MHz,  $\text{CDCl}_3$ )  $\delta$  148.4, 147.6, 139.0, 136.8, 131.2, 129.8, 127.8, 127.2, 120.7, 117.6, 111.3, 109.5, 78.8, 65.7, 55.7, 55.4, 23.8, 13.6.

HRMS-ESI<sup>+</sup> (m/z)  $[\text{M}+\text{Na}]^+$  calculated for  $\text{C}_{20}\text{H}_{24}\text{O}_3\text{SNa}$ , 367.1338, found: 337.1334.

### 2-(ethylthio)-1-(6-methoxynaphthalen-2-yl)-2-phenylbut-3-en-1-ol (3o)

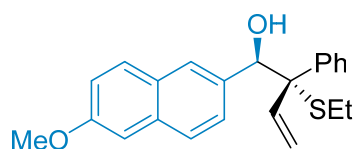

Prepared according to the general procedure and purified by silica gel flash column chromatograph (EA/PE = 1/20) to give **3o** as colorless oil (56 mg, 77%, d.r. > 20:1).

$R_f = 0.4$  (EA/PE = 1/10)

$^1\text{H}$  NMR (400 MHz,  $\text{CDCl}_3$ )  $\delta$  7.60 (d,  $J = 8.8$  Hz, 1H), 7.52 (d,  $J = 8.5$  Hz, 1H), 7.50 – 7.43 (m, 2H), 7.43 (s, 1H), 7.28 (m, 3H), 7.13 – 7.05 (m, 3H), 6.41 (dd,  $J = 17.4, 10.8$  Hz, 1H), 5.44 (d,  $J = 10.9$  Hz, 1H), 5.33 – 5.23 (m, 2H), 3.90 (s, 3H), 2.82 (d,  $J = 3.4$  Hz, 1H), 2.27 (dq,  $J = 11.6, 7.5$  Hz, 1H), 2.13 (dq,  $J = 11.6, 7.6$  Hz, 1H), 1.12 (t,  $J = 7.5$  Hz, 3H).

$^{13}\text{C}$  NMR (101 MHz,  $\text{CDCl}_3$ )  $\delta$  157.7, 139.1, 136.5, 134.2, 134.1, 129.7, 129.6, 127.9, 127.8, 127.5, 127.3, 126.8, 125.3, 118.6, 117.8, 105.5, 79.5, 65.6, 55.3, 23.9, 13.6.

HRMS-ESI<sup>+</sup> (m/z)  $[\text{M}-\text{OH}]^+$  calculated for  $\text{C}_{23}\text{H}_{23}\text{OS}$ , 347.1464, found: 347.1461.

### 1-([1,1'-biphenyl]-4-yl)-2-(ethylthio)-2-phenylbut-3-en-1-ol (**3p**)

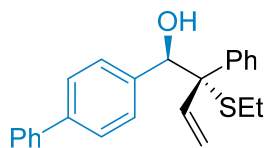

Prepared according to the general procedure and purified by silica gel flash column chromatograph (EA/PE = 1/20) to give **3p** as colorless oil (61 mg, 85%, d.r. = 6:1).

$R_f$  = 0.4 (EA/PE = 1/10)

$^1\text{H NMR}$  (400 MHz,  $\text{CDCl}_3$ )  $\delta$  7.58 (d,  $J$  = 7.4 Hz, 2H), 7.51 (d,  $J$  = 7.0 Hz, 2H), 7.43 (t,  $J$  = 8.1 Hz, 4H), 7.37 – 7.25 (m, 4H), 7.13 (d,  $J$  = 8.1 Hz, 2H), 6.41 (dd,  $J$  = 17.4, 10.8 Hz, 1H), 5.48 (d,  $J$  = 10.8 Hz, 1H), 5.33 (d,  $J$  = 17.4 Hz, 1H), 5.18 (d,  $J$  = 3.4 Hz, 1H), 2.79 (d,  $J$  = 3.4 Hz, 1H), 2.29 (dq,  $J$  = 11.6, 7.4 Hz, 1H), 2.14 (dq,  $J$  = 11.3, 7.4 Hz, 1H), 1.14 (t,  $J$  = 7.6 Hz, 3H).

$^{13}\text{C NMR}$  (101 MHz,  $\text{CDCl}_3$ )  $\delta$  140.8, 140.5, 139.1, 138.0, 136.4, 129.6, 128.8, 128.7, 127.9, 127.3, 127.2, 127.0, 125.8, 117.9, 79.2, 65.4, 23.9, 13.6.

$\text{HRMS-ESI}^+$  ( $m/z$ ) [ $\text{M-OH}$ ] $^+$  calculated for  $\text{C}_{24}\text{H}_{23}\text{S}$ , 343.1515, found: 343.1517.

### 2-(ethylthio)-1-(furan-2-yl)-2-phenylbut-3-en-1-ol (**3q**)

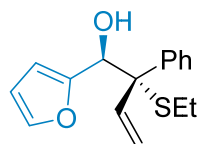

Prepared according to the general procedure and purified by silica gel flash column chromatograph (EA/PE = 1/20) to give **3q** as colorless oil (39 mg, 71%, d.r. > 20:1).

$R_f$  = 0.4 (EA/PE = 1/10)

$^1\text{H NMR}$  (400 MHz,  $\text{CDCl}_3$ )  $\delta$  7.50 (d,  $J$  = 7.2 Hz, 2H), 7.33 – 7.28 (m, 4H), 6.33 (dd,  $J$  = 17.5, 10.9 Hz, 1H), 6.23 (dd,  $J$  = 3.4, 1.9 Hz, 1H), 5.92 (d,  $J$  = 3.3 Hz, 1H), 5.46 (d,  $J$  = 10.8 Hz, 1H), 5.28 (d,  $J$  = 17.6 Hz, 1H), 5.19 (d,  $J$  = 5.4 Hz, 1H), 2.86 (d,  $J$  = 5.4 Hz, 1H), 2.34 – 2.21 (m, 2H), 1.15 (t,  $J$  = 7.5 Hz, 3H).

$^{13}\text{C NMR}$  (101 MHz,  $\text{CDCl}_3$ )  $\delta$  152.6, 141.4, 139.0, 136.9, 129.2, 127.8, 127.4, 117.5, 110.2, 108.5, 72.9, 64.4, 23.9, 13.7.

$\text{HRMS-ESI}^+$  ( $m/z$ ) [ $\text{M-OH}$ ] $^+$  calculated for  $\text{C}_{16}\text{H}_{17}\text{OS}$ , 257.0995, found: 257.0993.

### 2-(ethylthio)-2-phenyl-1-(thiophen-2-yl)but-3-en-1-ol (**3r**)

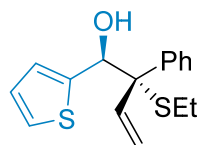

Prepared according to the general procedure and purified by silica gel flash column chromatograph (EA/PE = 1/20) to give **3r** as colorless oil (38 mg, 66%, d.r. > 20:1).

$R_f$  = 0.4 (EA/PE = 1/10)

$^1\text{H NMR}$  (400 MHz,  $\text{CDCl}_3$ )  $\delta$  7.51 (d,  $J$  = 7.2 Hz, 2H), 7.35 – 7.25 (m, 3H), 7.15 (d,  $J$  = 4.9 Hz, 1H), 6.85 (dd,  $J$  = 5.0, 3.5 Hz, 1H), 6.77 (d,  $J$  = 3.5 Hz, 1H), 6.38 (dd,  $J$  = 17.4, 10.8 Hz, 1H), 5.51 (d,  $J$  =

10.8 Hz, 1H), 5.43 (d,  $J = 4.2$  Hz, 1H), 5.34 (d,  $J = 17.3$  Hz, 1H), 3.01 (d,  $J = 4.2$  Hz, 1H), 2.32 (dq,  $J = 11.6, 7.6$  Hz, 1H), 2.21 (dq,  $J = 11.6, 7.5$  Hz, 1H), 1.15 (t,  $J = 7.5$  Hz, 3H).

$^{13}\text{C}$  NMR (101 MHz,  $\text{CDCl}_3$ )  $\delta$  142.6, 139.1, 136.8, 129.4, 128.0, 127.5, 126.3, 125.7, 125.2, 118.3, 75.4, 65.2, 24.1, 13.8.

HRMS-ESI<sup>+</sup> (m/z)  $[\text{M}-\text{OH}]^+$  calculated for  $\text{C}_{16}\text{H}_{17}\text{S}_2$ , 273.0766, found: 273.0764.

### 1-(benzofuran-2-yl)-2-(ethylthio)-2-phenylbut-3-en-1-ol (3s)

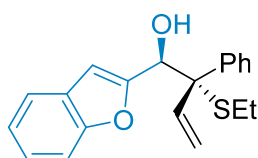

Prepared according to the general procedure and purified by silica gel flash column chromatograph (EA/PE = 1/20) to give **3s** as colorless oil (49 mg, 76%, d.r. = 10:1).

$R_f = 0.4$  (EA/PE = 1/10)

$^1\text{H}$  NMR (400 MHz,  $\text{CDCl}_3$ )  $\delta$  7.53 (d,  $J = 6.4$  Hz, 2H), 7.45 (d,  $J = 7.6$  Hz, 1H), 7.39 (d,  $J = 8.2$  Hz, 1H), 7.30 (d,  $J = 7.7$  Hz, 3H), 7.25 – 7.13 (m, 2H), 6.40 (dd,  $J = 17.5, 10.9$  Hz, 1H), 6.31 (s, 1H), 5.49 (d,  $J = 10.9$  Hz, 1H), 5.31 (dd,  $J = 10.4, 4.8$  Hz, 2H), 3.04 (d,  $J = 5.5$  Hz, 1H), 2.39 – 2.24 (m, 2H), 1.17 (t,  $J = 7.5$  Hz, 3H).

$^{13}\text{C}$  NMR (101 MHz,  $\text{CDCl}_3$ )  $\delta$  155.4, 154.2, 138.7, 136.8, 129.2, 127.9, 127.9, 127.5, 124.0, 122.6, 121.0, 117.7, 111.1, 105.4, 73.2, 64.4, 24.0, 13.7.

HRMS-ESI<sup>+</sup> (m/z)  $[\text{M}-\text{OH}]^+$  calculated for  $\text{C}_{20}\text{H}_{19}\text{OS}$ , 307.1151, found: 307.1148.

### 1-(benzo[b]thiophen-2-yl)-2-(ethylthio)-2-phenylbut-3-en-1-ol (3t)

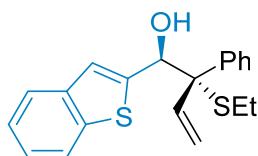

Prepared according to the general procedure and purified by silica gel flash column chromatograph (EA/PE = 1/20) to give **3t** as colorless oil (54 mg, 80%, d.r. > 20:1).

$R_f = 0.4$  (EA/PE = 1/10)

$^1\text{H}$  NMR (400 MHz,  $\text{CDCl}_3$ )  $\delta$  7.71 (d,  $J = 7.4$  Hz, 1H), 7.64 (d,  $J = 6.9$  Hz, 1H), 7.56 (d,  $J = 6.6$  Hz, 2H), 7.34 – 7.22 (m, 5H), 7.01 (s, 1H), 6.43 (dd,  $J = 17.4, 10.8$  Hz, 1H), 5.53 (d,  $J = 10.8$  Hz, 1H), 5.48 (d,  $J = 4.4$  Hz, 1H), 5.36 (d,  $J = 17.4$  Hz, 1H), 3.13 (d,  $J = 4.4$  Hz, 1H), 2.34 (dq,  $J = 11.6, 7.5$  Hz, 1H), 2.23 (dq,  $J = 11.6, 7.5$  Hz, 1H), 1.16 (t,  $J = 7.5$  Hz, 3H).

$^{13}\text{C}$  NMR (101 MHz,  $\text{CDCl}_3$ )  $\delta$  143.5, 139.8, 138.9, 138.8, 136.8, 129.4, 128.1, 127.6, 124.0, 123.9, 123.4, 123.1, 122.0, 118.4, 75.8, 65.1, 24.2, 13.8.

HRMS-ESI<sup>+</sup> (m/z)  $[\text{M}-\text{OH}]^+$  calculated for  $\text{C}_{20}\text{H}_{19}\text{S}_2$ , 323.0923, found: 323.0920.

### 1-(dibenzo[b,d]thiophen-4-yl)-2-(ethylthio)-2-phenylbut-3-en-1-ol (**3u**)

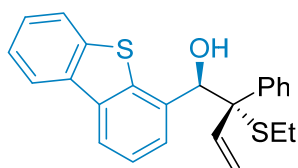

Prepared according to the general procedure and purified by silica gel flash column chromatograph (EA/PE = 1/20) to give **3u** as colorless oil (64 mg, 82%, d.r. > 20:1).

$R_f$  = 0.4 (EA/PE = 1/10)

$^1\text{H NMR}$  (400 MHz,  $\text{CDCl}_3$ )  $\delta$  8.15 – 8.08 (m, 1H), 8.06 (d,  $J$  = 7.7 Hz, 1H), 7.85 – 7.78 (m, 1H), 7.55 (d,  $J$  = 9.1 Hz, 2H), 7.47 – 7.40 (m, 2H), 7.30 (q,  $J$  = 7.8 Hz, 4H), 7.14 (d,  $J$  = 7.6 Hz, 1H), 6.49 (dd,  $J$  = 17.2, 10.8 Hz, 1H), 5.51 (d,  $J$  = 2.6 Hz, 1H), 5.49 – 5.37 (m, 2H), 2.92 (d,  $J$  = 2.8 Hz, 1H), 2.27 (dq,  $J$  = 11.8, 7.6 Hz, 1H), 2.17 (dq,  $J$  = 11.8, 7.5 Hz, 1H), 1.10 (t,  $J$  = 7.5 Hz, 3H).

$^{13}\text{C NMR}$  (101 MHz,  $\text{CDCl}_3$ )  $\delta$  139.7, 139.5, 139.1, 136.1, 135.6, 135.4, 134.0, 129.6, 127.9, 127.4, 127.0, 126.6, 124.2, 123.7, 122.3, 121.4, 121.2, 118.6, 78.8, 65.9, 24.1, 13.6.

HRMS-ESI<sup>+</sup> (m/z) [M-OH]<sup>+</sup> calculated for  $\text{C}_{24}\text{H}_{21}\text{S}_2$ , 373.1079, found: 373.1076.

### 8-chloro-3-(ethylthio)-3-phenyloct-1-en-4-ol (**3v**)

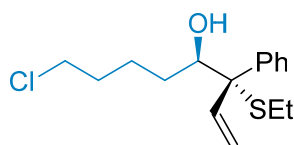

Prepared according to the general procedure and purified by silica gel flash column chromatograph (EA/PE = 1/20) to give **3v** as colorless oil (42 mg, 71%, d.r. > 20:1).

$R_f$  = 0.4 (EA/PE = 1/10)

$^1\text{H NMR}$  (400 MHz,  $\text{CDCl}_3$ )  $\delta$  7.52 (d,  $J$  = 7.5 Hz, 2H), 7.35 (t,  $J$  = 7.4 Hz, 2H), 7.27 (d,  $J$  = 7.1 Hz, 1H), 6.21 (dd,  $J$  = 17.6, 11.0 Hz, 1H), 5.44 (d,  $J$  = 11.0 Hz, 1H), 5.22 (d,  $J$  = 17.6 Hz, 1H), 4.00 (dd,  $J$  = 9.8, 4.0 Hz, 1H), 3.48 (t,  $J$  = 6.5 Hz, 2H), 2.36 (d,  $J$  = 4.0 Hz, 1H), 2.30 (dq,  $J$  = 11.7, 7.4 Hz, 1H), 2.16 (dq,  $J$  = 11.6, 7.5 Hz, 1H), 1.80 – 1.62 (m, 3H), 1.56 – 1.41 (m, 2H), 1.14 (t,  $J$  = 7.6 Hz, 3H), 1.10 – 1.02 (m, 1H).

$^{13}\text{C NMR}$  (101 MHz,  $\text{CDCl}_3$ )  $\delta$  139.6, 137.5, 128.8, 128.2, 127.3, 116.5, 74.9, 64.5, 44.9, 32.4, 31.5, 24.3, 23.7, 13.8.

HRMS-ESI<sup>+</sup> (m/z) [M-OH]<sup>+</sup> calculated for  $\text{C}_{16}\text{H}_{22}\text{ClS}$ , 281.1125, found: 281.1123.

### 4-(ethylthio)-1-(methylthio)-4-phenylhex-5-en-3-ol (**3w**)

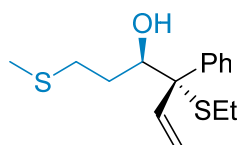

Prepared according to the general procedure and purified by silica gel flash column chromatograph (EA/PE = 1/20) to give **3w** as colorless oil (42 mg, 74%, d.r. > 20:1).

$R_f$  = 0.4 (EA/PE = 1/10)

**<sup>1</sup>H NMR (400 MHz, CDCl<sub>3</sub>)** δ 7.52 (d, *J* = 7.6 Hz, 2H), 7.34 (t, *J* = 7.6 Hz, 2H), 7.28 (s, 1H), 6.21 (dd, *J* = 17.7, 11.0 Hz, 1H), 5.44 (d, *J* = 10.8 Hz, 1H), 5.28 (d, *J* = 17.6 Hz, 1H), 4.24 (dd, *J* = 9.7, 3.6 Hz, 1H), 2.70 – 2.54 (m, 2H), 2.53 (d, *J* = 3.7 Hz, 1H), 2.33 (dq, *J* = 11.6, 7.5 Hz, 1H), 2.21 (dq, *J* = 11.8, 7.5 Hz, 1H), 2.03 (s, 3H), 1.79 (dt, *J* = 14.7, 8.0 Hz, 1H), 1.37 – 1.28 (m, 1H), 1.15 (t, *J* = 7.5 Hz, 3H).  
**<sup>13</sup>C NMR (101 MHz, CDCl<sub>3</sub>)** δ 139.6, 137.5, 128.7, 128.1, 127.3, 116.5, 73.0, 64.1, 31.5, 31.3, 23.7, 15.4, 13.8.

**HRMS-ESI<sup>+</sup>** (m/z) [M-OH]<sup>+</sup> calculated for C<sub>15</sub>H<sub>21</sub>S<sub>2</sub>, 265.1079, found: 265.1077.

#### 4-(ethylthio)-1,4-diphenylhex-5-en-3-ol (3x)

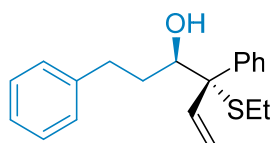

Prepared according to the general procedure and purified by silica gel flash column chromatograph (EA/PE = 1/20) to give **3x** as colorless oil (52 mg, 83%, d.r. > 20:1).

**R<sub>f</sub>** = 0.4 (EA/PE = 1/10)

**<sup>1</sup>H NMR (400 MHz, CDCl<sub>3</sub>)** δ 7.52 (d, *J* = 7.7 Hz, 2H), 7.35 (t, *J* = 7.4 Hz, 2H), 7.29 (d, *J* = 7.3 Hz, 3H), 7.23 – 7.13 (m, 3H), 6.19 (dd, *J* = 17.6, 11.0 Hz, 1H), 5.39 (d, *J* = 11.0 Hz, 1H), 5.08 (d, *J* = 17.6 Hz, 1H), 4.03 (dd, *J* = 10.0, 3.8 Hz, 1H), 2.88 (ddd, *J* = 14.0, 9.5, 4.8 Hz, 1H), 2.65 (dt, *J* = 13.7, 8.2 Hz, 1H), 2.45 (d, *J* = 4.0 Hz, 1H), 2.30 (dq, *J* = 11.7, 7.5 Hz, 1H), 2.17 (dq, *J* = 11.6, 7.5 Hz, 1H), 1.86 (dt, *J* = 14.5, 8.6 Hz, 1H), 1.38 (dtd, *J* = 14.3, 9.6, 4.8 Hz, 1H), 1.16 (t, *J* = 7.5 Hz, 3H).

**<sup>13</sup>C NMR (101 MHz, CDCl<sub>3</sub>)** δ 141.9, 139.5, 137.5, 128.8, 128.6, 128.3, 128.1, 127.3, 125.8, 116.2, 73.8, 64.4, 34.0, 32.9, 23.6, 13.9.

**HRMS-ESI<sup>+</sup>** (m/z) [M-OH]<sup>+</sup> calculated for C<sub>20</sub>H<sub>23</sub>S, 295.1515, found: 295.1512.

#### 2-(ethylthio)-2-phenyl-1-(2,4,6-trifluorophenyl)but-3-en-1-ol (3y)

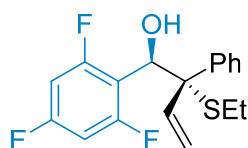

Prepared according to the general procedure and purified by silica gel flash column chromatograph (EA/PE = 1/50) to give **3y** as yellow solid (47 mg, 70%, d.r. > 20:1).

**R<sub>f</sub>** = 0.4 (EA/PE = 1/10)

**<sup>1</sup>H NMR (500 MHz, CDCl<sub>3</sub>)** δ 7.55 (d, *J* = 7.7 Hz, 2H), 7.35 – 7.27 (m, 3H), 6.55 (t, *J* = 9.1 Hz, 2H), 6.31 (dd, *J* = 17.3, 10.8 Hz, 1H), 5.54 (d, *J* = 9.6 Hz, 1H), 5.44 (d, *J* = 10.8 Hz, 1H), 5.20 (d, *J* = 17.3 Hz, 1H), 2.84 (d, *J* = 10.1 Hz, 1H), 2.16 – 2.10 (m, 2H), 1.08 (t, *J* = 7.5 Hz, 3H).

**<sup>13</sup>C NMR (101 MHz, CDCl<sub>3</sub>)** δ 163.2 (t, *J* = 16.3 Hz), 162.6 – 162.2 (m), 161.2 (t, *J* = 16.3 Hz), 160.7 – 160.2 (m), 138.1, 135.9, 129.8, 128.2, 127.6, 118.1, 112.4 (td, *J* = 15.8, 4.6 Hz), 100.5 (t, *J* = 28.4 Hz), 73.1, 65.6, 24.1, 13.4.

**<sup>19</sup>F NMR (377 MHz, CDCl<sub>3</sub>)** δ -105.11, -108.24 (t, *J* = 7.0 Hz)

**HRMS-ESI<sup>+</sup>** (m/z) [M+Na]<sup>+</sup> calculated for C<sub>18</sub>H<sub>17</sub>F<sub>3</sub>OSNa, 361.0844, found: 361.0840.

### 2-(benzylthio)-1,2-diphenylbut-3-en-1-ol (**3ab**)

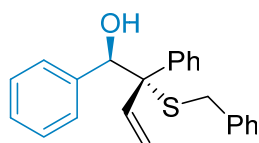

Prepared according to the general procedure and purified by silica gel flash column chromatograph (EA/PE = 1/50) to give **3ab** as colorless oil (50 mg, 72%, d.r. > 20:1).

$R_f$  = 0.4 (EA/PE = 1/10)

$^1\text{H NMR}$  (500 MHz,  $\text{CDCl}_3$ )  $\delta$  7.54 (d,  $J$  = 7.7 Hz, 2H), 7.37 – 7.26 (m, 5H), 7.24 – 7.14 (m, 6H), 7.07 (d,  $J$  = 7.5 Hz, 2H), 6.46 (dd,  $J$  = 17.3, 10.8 Hz, 1H), 5.54 (d,  $J$  = 10.8 Hz, 1H), 5.41 (d,  $J$  = 17.4 Hz, 1H), 5.18 (s, 1H), 3.45 (d,  $J$  = 11.6 Hz, 1H), 3.25 (d,  $J$  = 11.5 Hz, 1H), 2.64 (s, 1H).

$^{13}\text{C NMR}$  (126 MHz,  $\text{CDCl}_3$ )  $\delta$  138.8, 138.7, 137.1, 136.1, 129.6, 129.1, 128.5, 128.3, 128.0, 127.9, 127.4, 127.1, 127.1, 118.2, 79.6, 66.1, 34.8.

HRMS-ESI $^+$  (m/z)  $[\text{M}+\text{H}]^+$  calculated for  $\text{C}_{23}\text{H}_{23}\text{OS}$ , 347.1464, found: 347.1466.

### 1,2-diphenyl-2-(propylthio)but-3-en-1-ol (**3ac**)

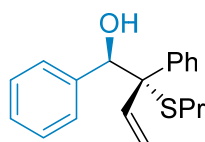

Prepared according to the general procedure and purified by silica gel flash column chromatograph (EA/PE = 1/50) to give **3ac** as colorless oil (42 mg, 70%, d.r. > 20:1).

$R_f$  = 0.4 (EA/PE = 1/10)

$^1\text{H NMR}$  (500 MHz,  $\text{CDCl}_3$ )  $\delta$  7.44 (d,  $J$  = 7.1 Hz, 2H), 7.31 – 7.26 (m, 3H), 7.23 – 7.14 (m, 3H), 7.03 (d,  $J$  = 7.4 Hz, 2H), 6.34 (dd,  $J$  = 17.4, 10.9 Hz, 1H), 5.44 (d,  $J$  = 10.6 Hz, 1H), 5.28 (d,  $J$  = 17.4 Hz, 1H), 5.12 (s, 1H), 2.76 (s, 1H), 2.25 – 2.19 (m, 1H), 2.12 – 2.06 (m, 1H), 1.53 – 1.44 (m, 2H), 0.90 (t,  $J$  = 7.3 Hz, 3H).

$^{13}\text{C NMR}$  (126 MHz,  $\text{CDCl}_3$ )  $\delta$  138.9, 138.9, 136.5, 129.7, 128.3, 127.8, 127.3, 127.1, 117.8, 79.3, 65.3, 31.8, 22.2, 13.8.

HRMS-ESI $^+$  (m/z)  $[\text{M}+\text{H}]^+$  calculated for  $\text{C}_{19}\text{H}_{23}\text{OS}$ , 299.1464, found: 299.1467.

### 2-(4-chlorophenyl)-2-(ethylthio)-1-phenylbut-3-en-1-ol (**3ad**)

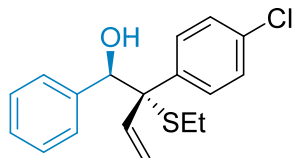

Prepared according to the general procedure and purified by silica gel flash column chromatograph (EA/PE = 1/50) to give **3ad** as colorless oil (49 mg, 77%, d.r. > 20:1).

$R_f$  = 0.4 (EA/PE = 1/10)

$^1\text{H NMR}$  (500 MHz,  $\text{CDCl}_3$ )  $\delta$  7.36 (d,  $J$  = 8.3 Hz, 2H), 7.26 – 7.17 (m, 5H), 7.02 (d,  $J$  = 7.5 Hz, 2H), 6.29 (dd,  $J$  = 17.3, 10.9 Hz, 1H), 5.44 (d,  $J$  = 10.7 Hz, 1H), 5.23 (d,  $J$  = 17.4 Hz, 1H), 5.06 (s, 1H), 2.73 (s, 1H), 2.30 – 2.21 (m, 1H), 2.15 – 2.07 (m, 1H), 1.13 (t,  $J$  = 7.5 Hz, 3H).

$^{13}\text{C}$  NMR (126 MHz,  $\text{CDCl}_3$ )  $\delta$  138.6 , 137.4 , 136.2 , 133.1 , 131.2 , 128.2 , 128.0 , 127.8 , 127.2 , 117.9 , 79.3 , 65.0 , 23.9 , 13.5 .

HRMS-ESI $^+$  (m/z) [ $\text{M}+\text{Na}$ ] $^+$  calculated for  $\text{C}_{18}\text{H}_{19}\text{ClOSNa}$ , 341.0737, found: 341.0742.

### 2-(ethylthio)-2-(4-methoxyphenyl)-1-phenylbut-3-en-1-ol (3ae)

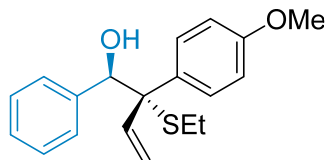

Prepared according to the general procedure and purified by silica gel flash column chromatograph (EA/PE = 1/50) to give **3ae** as colorless oil (47 mg, 75%, d.r. > 20:1).

$R_f$  = 0.4 (EA/PE = 1/10)

$^1\text{H}$  NMR (500 MHz,  $\text{CDCl}_3$ )  $\delta$  7.35 (d,  $J$  = 8.5 Hz, 2H), 7.24 – 7.16 (m, 3H), 7.04 (d,  $J$  = 7.1 Hz, 2H), 6.82 (d,  $J$  = 8.7 Hz, 2H), 6.31 (dd,  $J$  = 17.5, 11.0 Hz, 1H), 5.41 (d,  $J$  = 10.7 Hz, 1H), 5.26 (d,  $J$  = 17.3 Hz, 1H), 5.07 (s, 1H), 3.81 (s, 3H), 2.70 (s, 1H), 2.28 – 2.21 (m, 1H), 2.14 – 2.07 (m, 1H), 1.12 (t,  $J$  = 7.5 Hz, 3H).

$^{13}\text{C}$  NMR (126 MHz,  $\text{CDCl}_3$ )  $\delta$  158.6 , 138.9 , 136.6 , 130.8 , 130.7 , 128.4 , 127.8 , 127.1 , 117.6 , 113.1 , 79.5 , 65.0 , 55.2 , 23.8 , 13.6 .

HRMS-ESI $^+$  (m/z) [ $\text{M}+\text{Na}$ ] $^+$  calculated for  $\text{C}_{19}\text{H}_{22}\text{O}_2\text{SNa}$ , 337.1232, found: 337.1235.

## S13 References

- [1] Sun, M.; Jiang, J.; Chen, J.; Yang, Q.; Yu, X. Deep eutectic solvent promoted hydrothiocyanation of alkynoates leading to Z-3-thiocyanatoacrylates. *Tetrahedron*. **2019**, *75*, 130456.
- [2] Gropp, C.; Fischer, S.; Husch, T.; Trapp, N.; Carreira, E. M.; Diederich, F. Molecular Recognition and Cocrystallization of Methylated and Halogenated Fragments of Danicalipin A by Enantiopure AllenoAcetylenic Cage Receptors. *J. Am. Chem. Soc.* **2020**, *142*, 4749–4755.
- [3] Xu, S.; Held, I.; Kempf, B.; Mayr, H.; Steglich, W.; Zipse, H. The DMAP-Catalyzed Acetylation of Alcohols—A Mechanistic Study(DMAP = 4-(Dimethylamino)pyridine). *Chem. Eur. J.* **2005**, *11*, 4751-4757.
- [4] Frisch, M. J.; Trucks, G. W.; Schlegel, H. B.; Scuseria, G. E.; Robb, M. A.; Cheeseman, J. R.; Scalmani, G.; Barone, V.; Petersson, G. A.; Nakatsuji, H.; Li, X.; Caricato, M.; Marenich, A. V.; Bloino, J.; Janesko, B. G.; Gomperts, R.; Mennucci, B.; Hratchian, H. P.; Ortiz, J. V.; Izmaylov, A. F.; Sonnenberg, J. L.; Williams-Young, D.; Ding, F.; Lipparini, F.; Egidi, F.; Goings, J.; Peng, B.; Petrone, A.; Henderson, T.; Ranasinghe, D.; Zakrzewski, V. G.; Gao, J.; Rega, N.; Zheng, G.; Liang, W.; Hada, M.; Ehara, M.; Toyota, K.; Fukuda, R.; Hasegawa, J.; Ishida, M.; Nakajima, T.; Honda, Y.; Kitao, O.; Nakai, H.; Vreven, T.; Throssell, K.; Montgomery, J. A., Jr.; Peralta, J. E.; Ogliaro, F.; Bearpark, M. J.; Heyd, J. J.; Brothers, E. N.; Kudin, K. N.; Staroverov, V. N.; Keith, T. A.; Kobayashi, R.; Normand, J.; Raghavachari, K.; Rendell, A. P.; Burant, J. C.; Iyengar, S. S.; Tomasi, J.; Cossi, M.; Millam, J. M.; Klene, M.; Adamo, C.; Cammi, R.; Ochterski, J. W.; Martin, R. L.; Morokuma, K.; Farkas, O.; Foresman, J. B.; Fox, D. J. Gaussian 16, Revision 02C; Gaussian, Inc.: Wallingford CT, 2019.
- [5] Y. Zhao and D. G. Truhlar, “A new local density functional for main-group thermochemistry, transition metal bonding, thermochemical kinetics, and noncovalent interactions,” *J. Chem. Phys.*, **125** (2006), 194101: 1-18.
- [6] S. Grimme, J. Antony, S. Ehrlich and H. Krieg, “A consistent and accurate ab initio parameterization of density functional dispersion correction (DFT-D) for the 94 elements H-Pu,” *J. Chem. Phys.*, **132** (2010) 154104.
- [7] R. Ditchfield, W. J. Hehre, and J. A. Pople, “Self-Consistent Molecular Orbital Methods. 9. Extended Gaussian-type basis for molecular-orbital studies of organic molecules,” *J. Chem. Phys.*, **54** (1971) 724.
- [8] M. Dolg, U. Wedig, H. Stoll, and H. Preuss, “Energy-adjusted ab initio pseudopotentials for the first row transition elements,” *J. Chem. Phys.*, **86** (1987) 866-72.
- [9] Y. Zhao and D. G. Truhlar, “The M06 suite of density functionals for main group thermochemistry, thermochemical kinetics, noncovalent interactions, excited states, and transition elements: two new functionals and systematic testing of four M06-class functionals and 12 other functionals,” *Theor. Chem. Acc.*, **120** (2008) 215-41.
- [10] A. V. Marenich, C. J. Cramer, and D. G. Truhlar, “Universal solvation model based on solute electron density and a continuum model of the solvent defined by the bulk dielectric constant and atomic surface tensions,” *J. Phys. Chem. B*, **113** (2009) 6378-96.
- [11] Luchini, G.; Alegre-Requena, J. V.; Funes-Ardoiz, I.; Paton, R. S. F1000Research, 2020, 9, 291.
- [12] Grimme, S. *Chem. Eur. J.* **2012**, *18*, 9955-9964.
- [13] CYLview20; Legault, C. Y., Université de Sherbrooke, 2020 (<http://www.cylview.org>).

## S14 Spectra of Compounds

### S14.1 Spectra of substrates

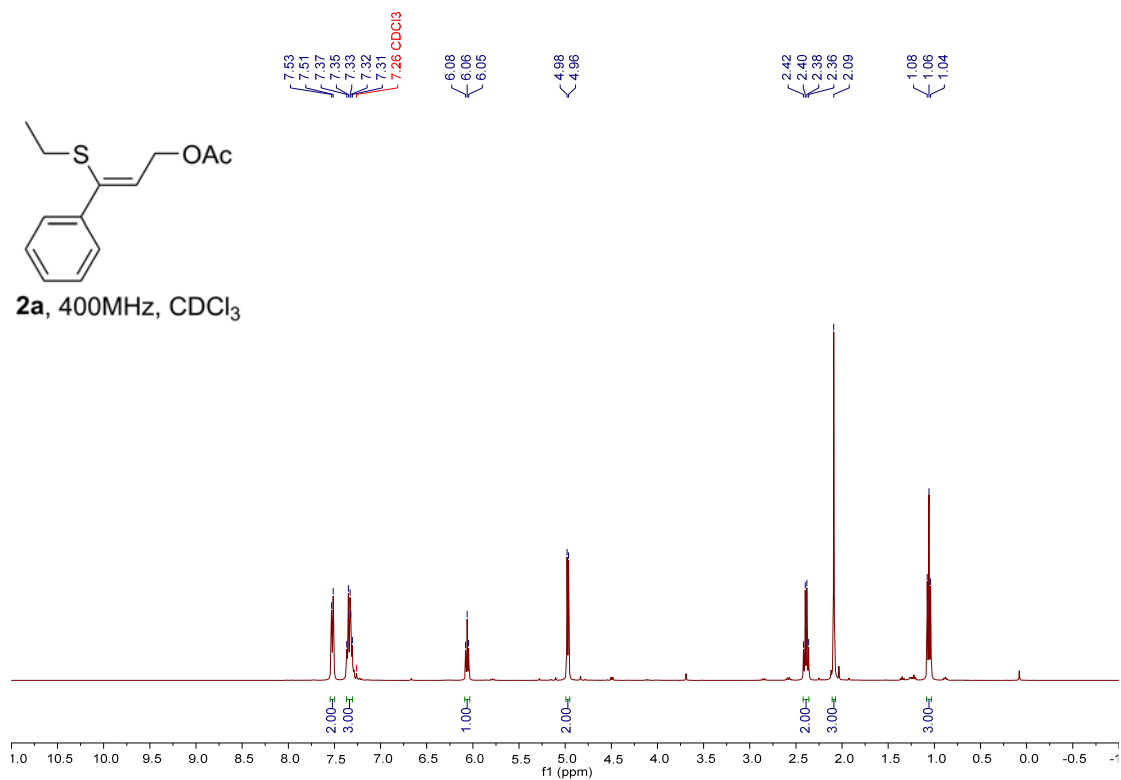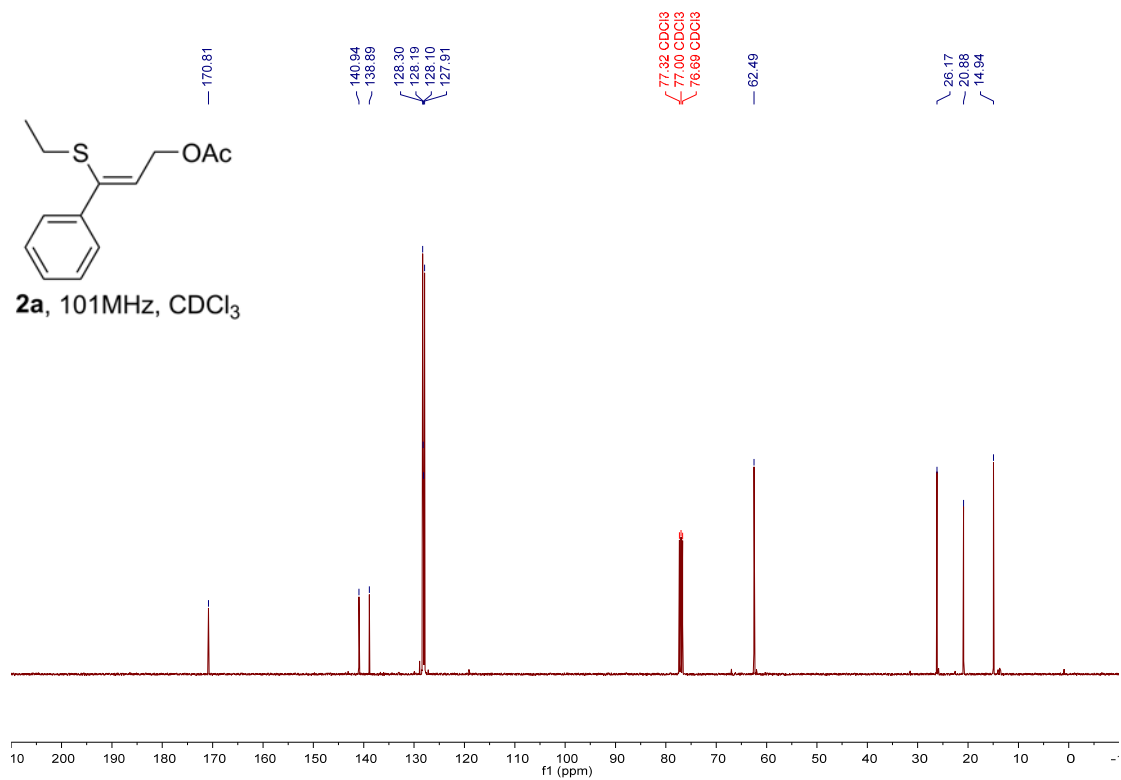

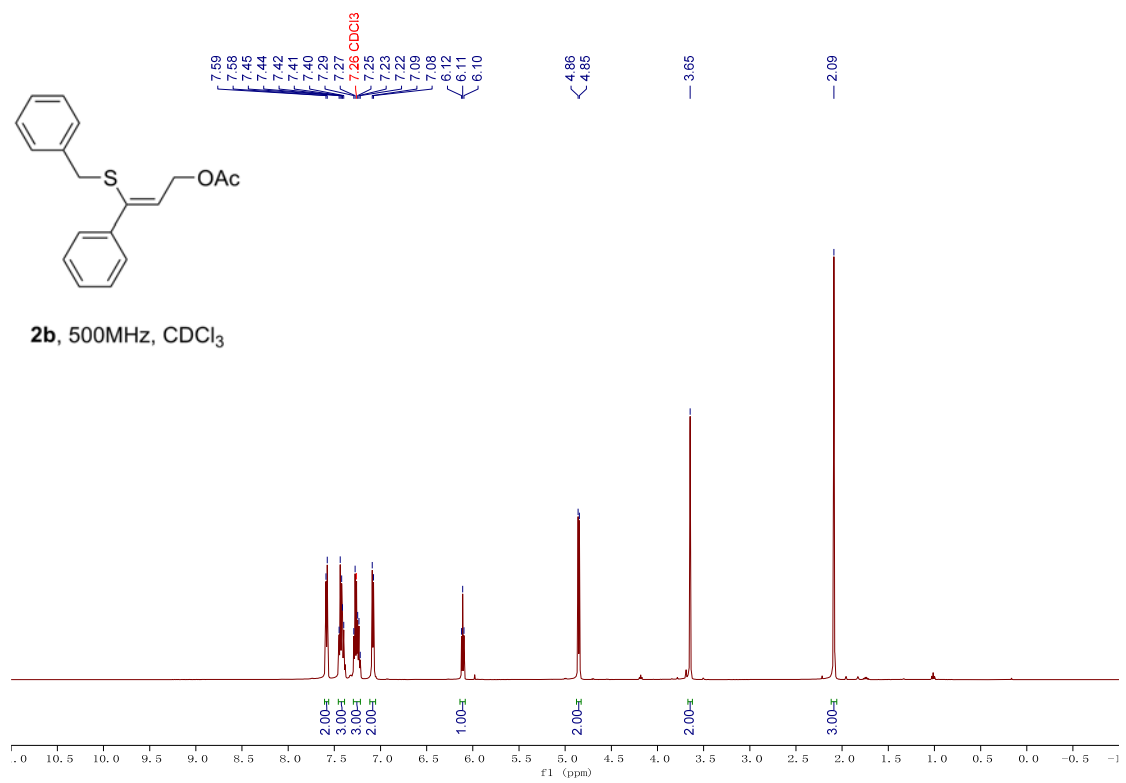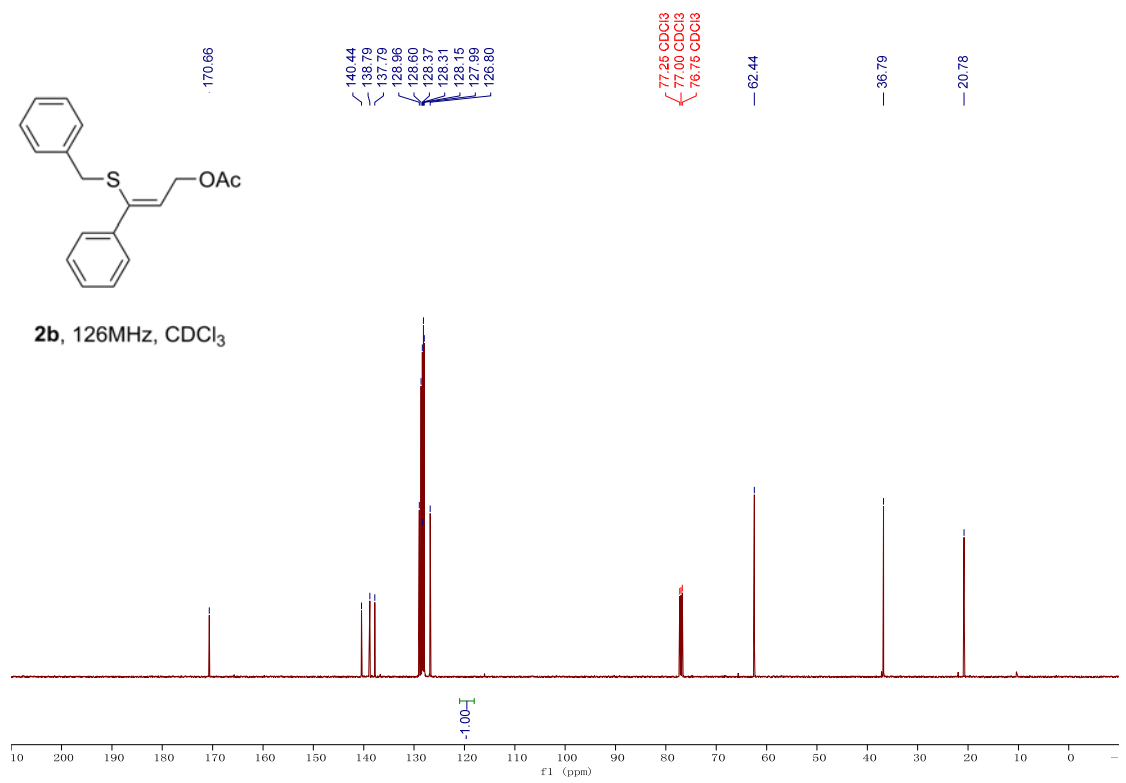

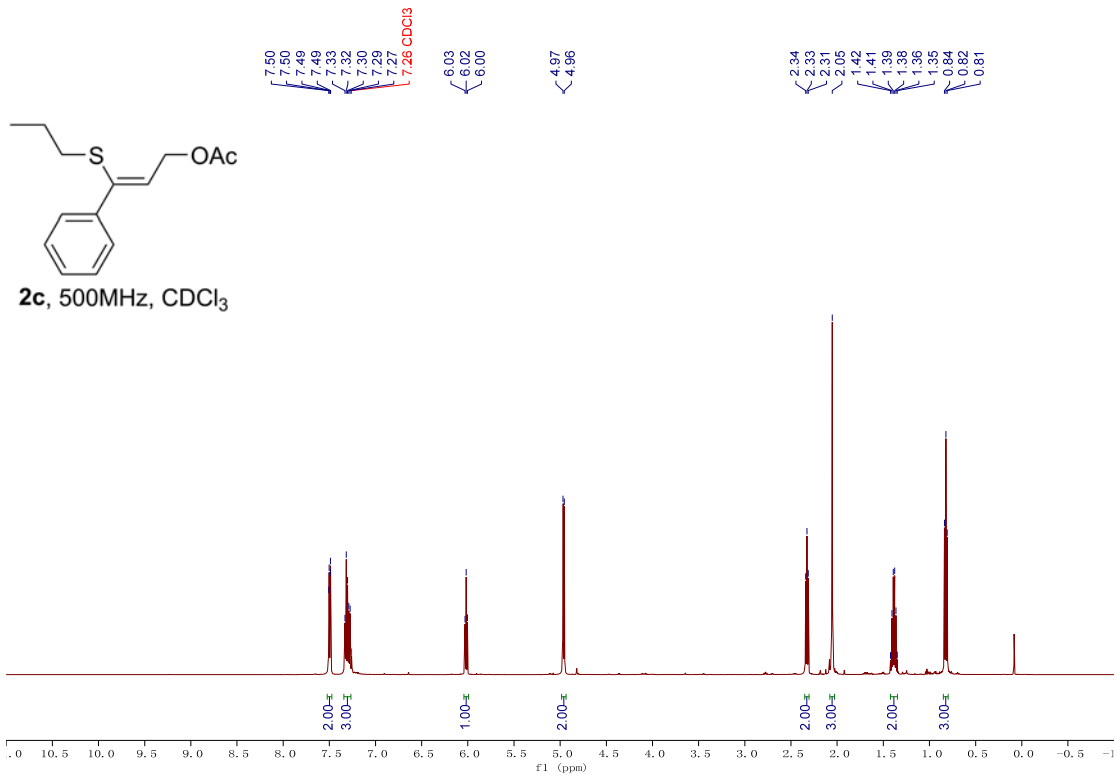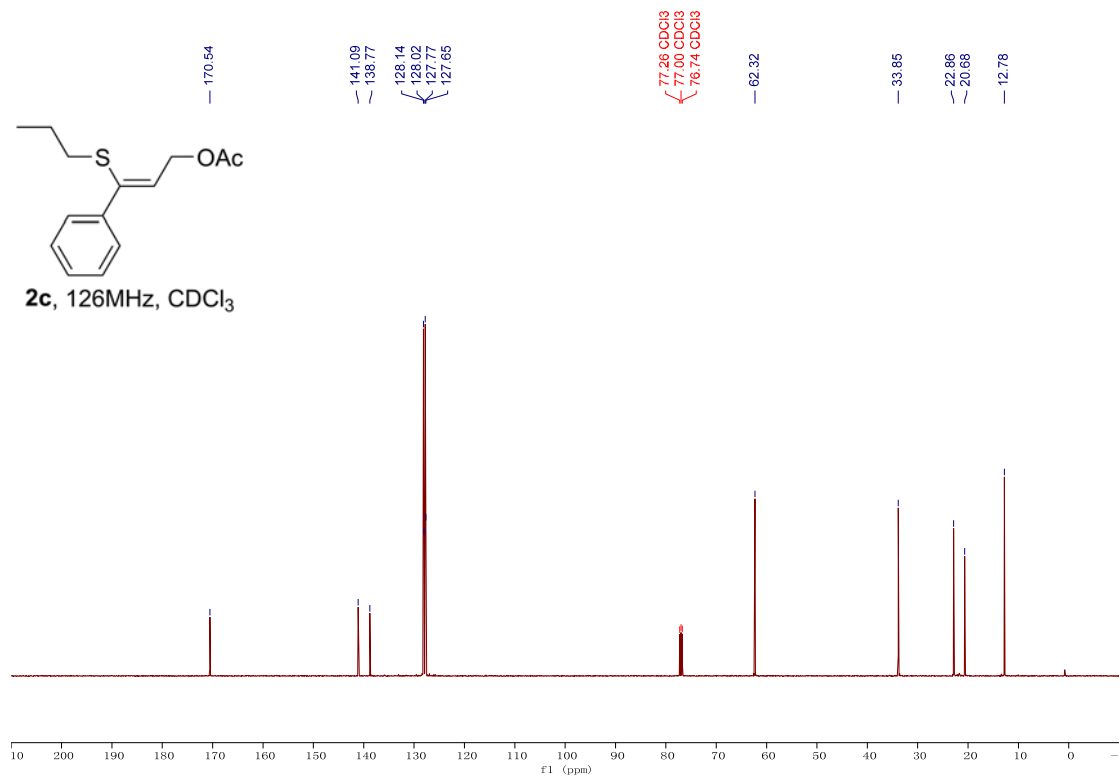

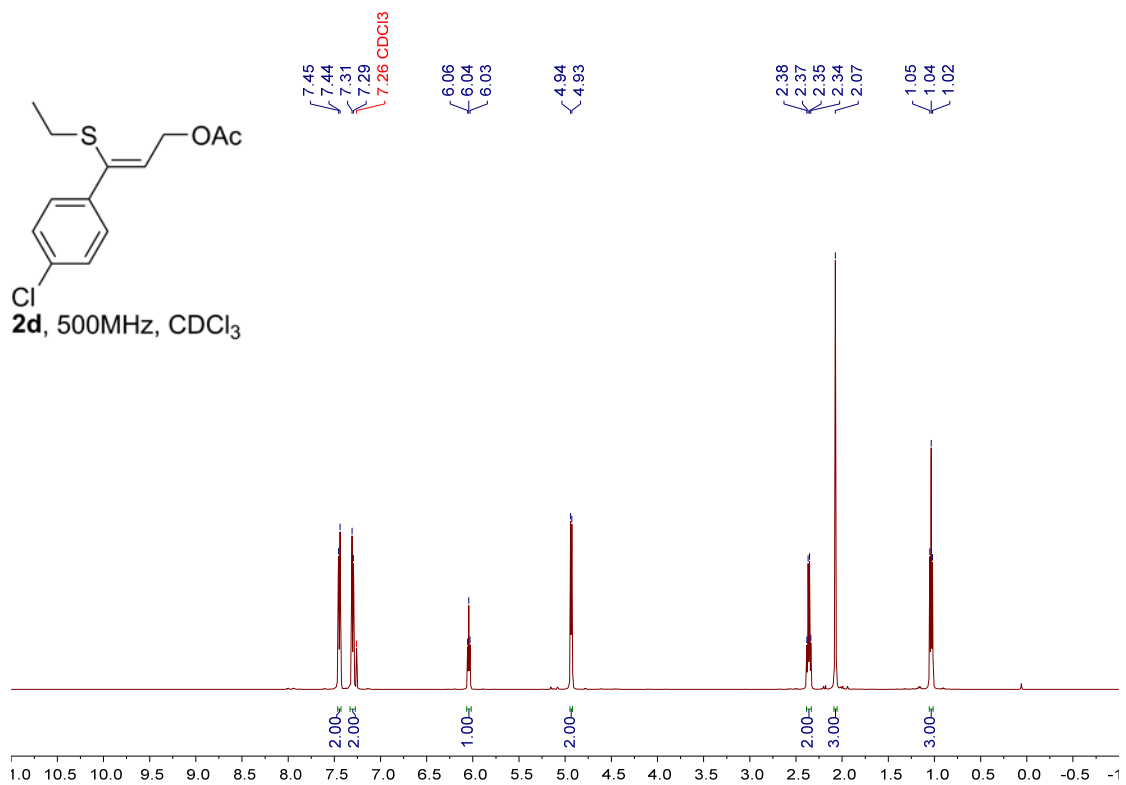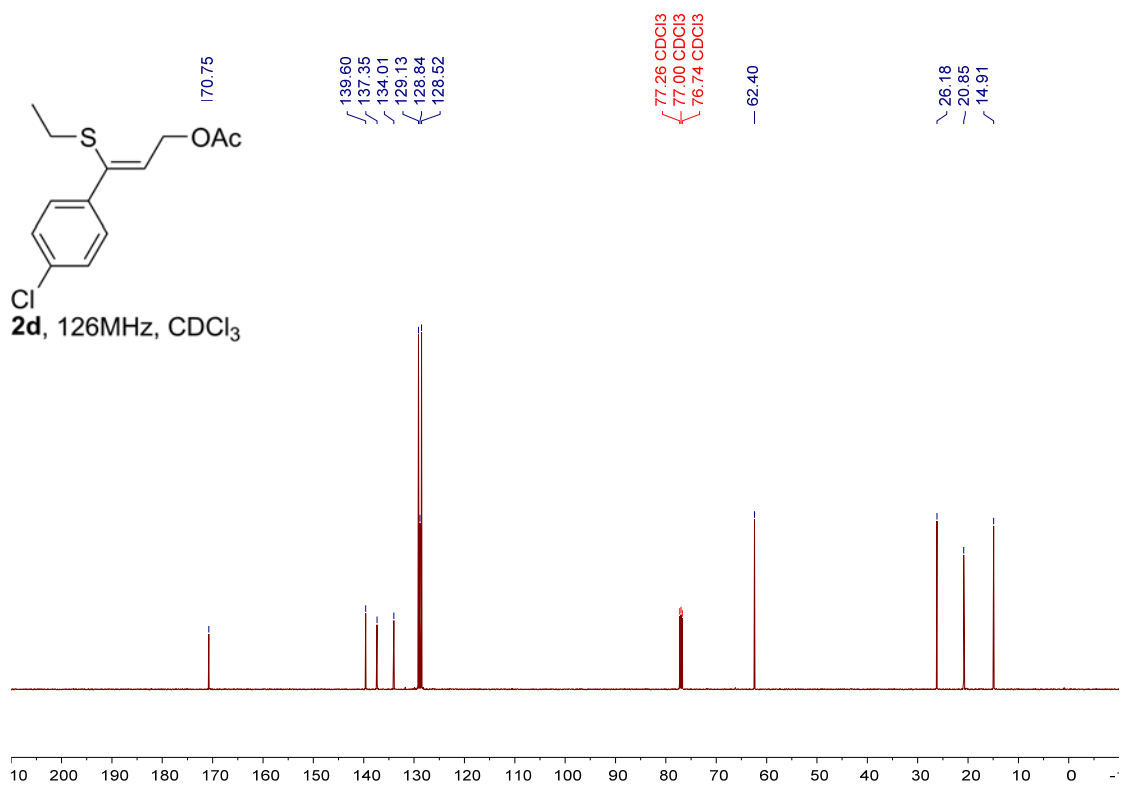

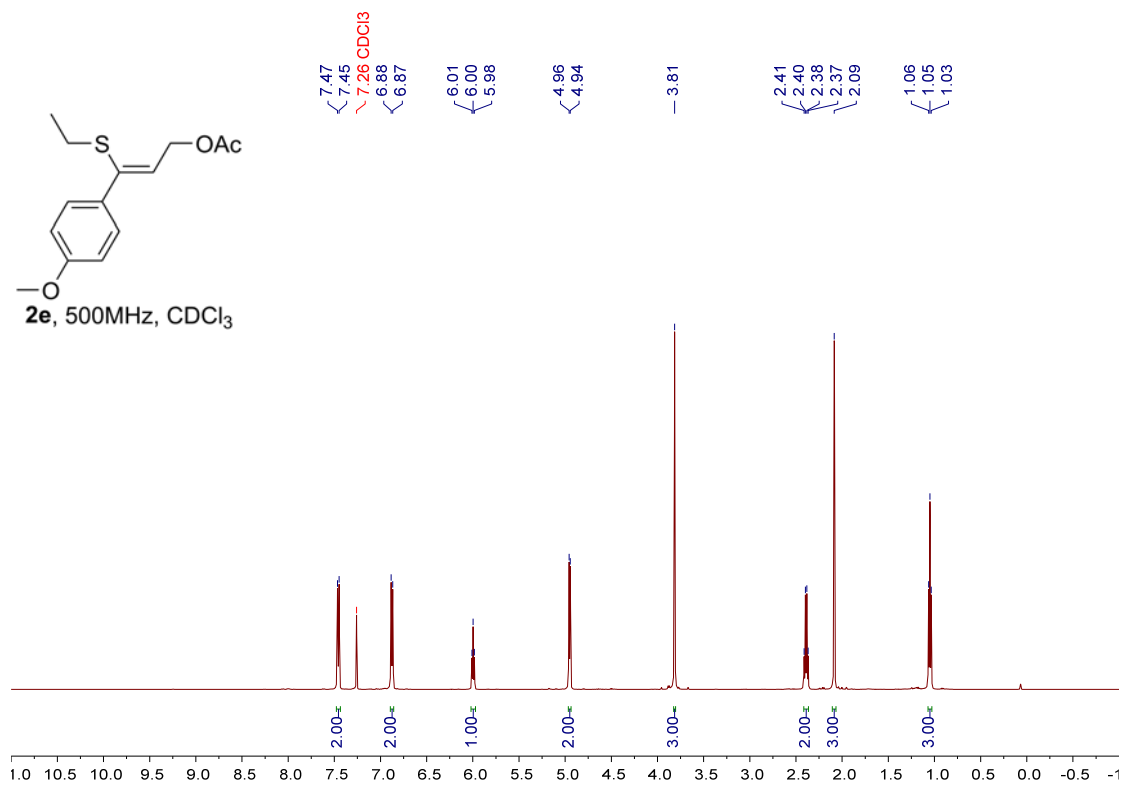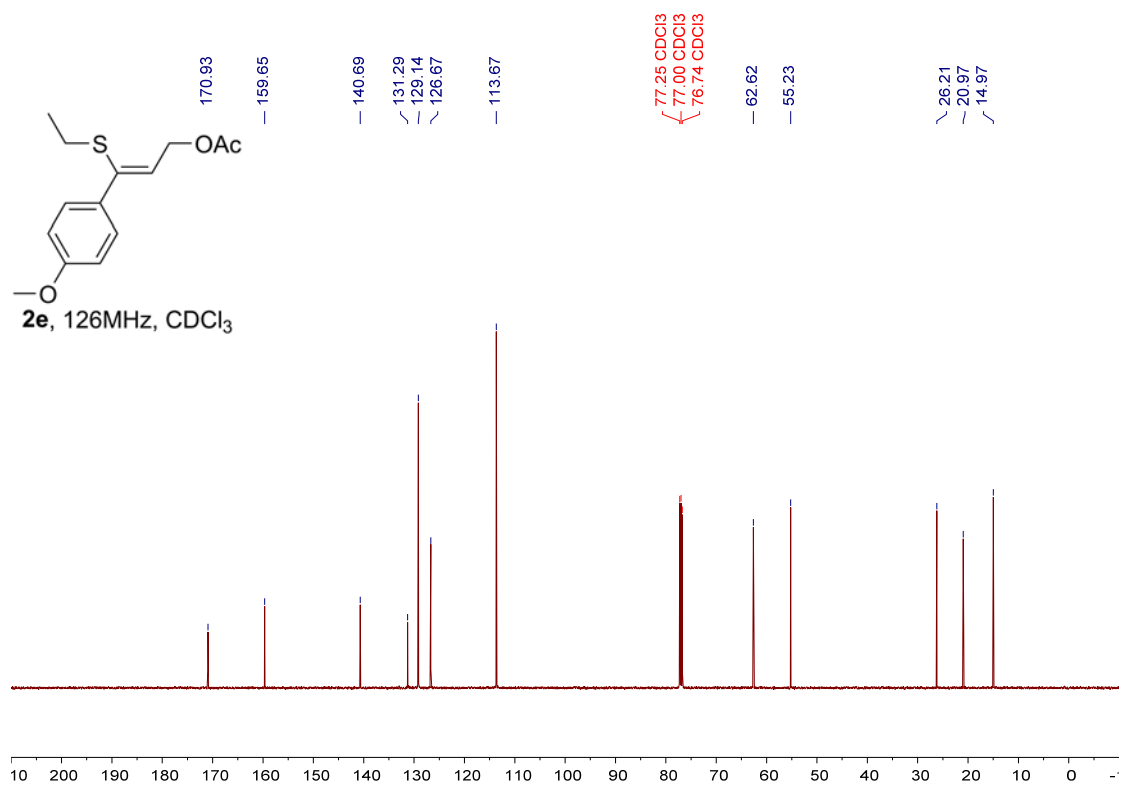

## S14.2 Spectra of products

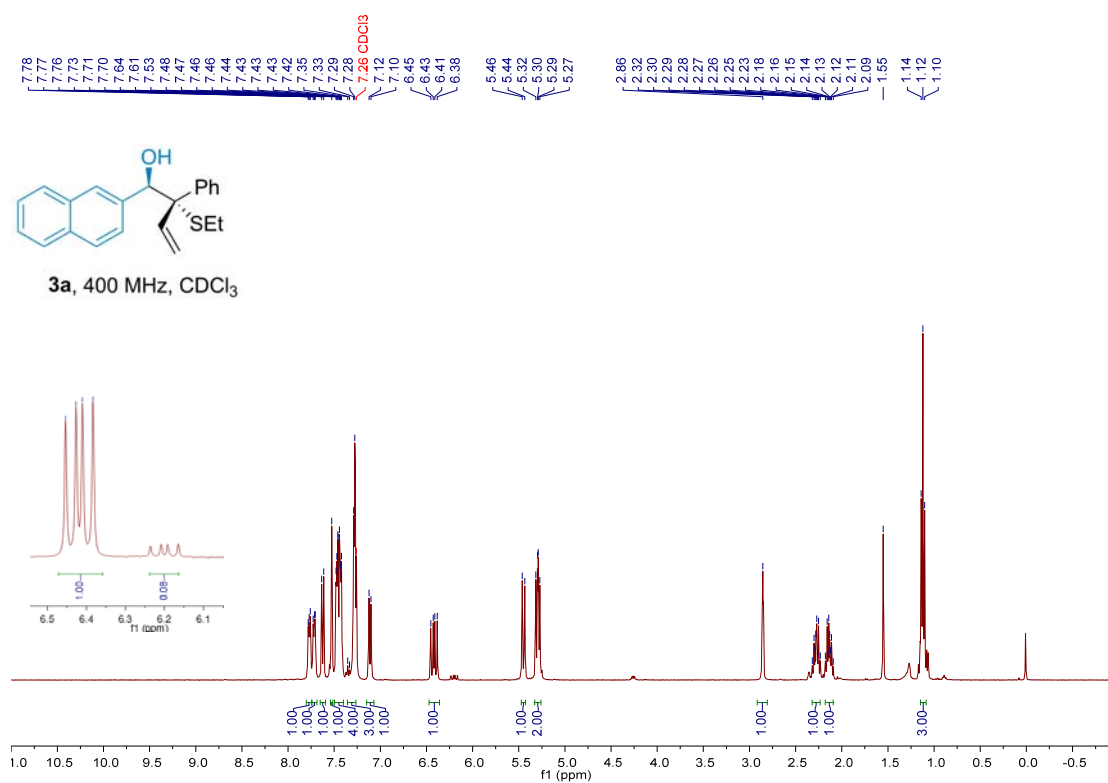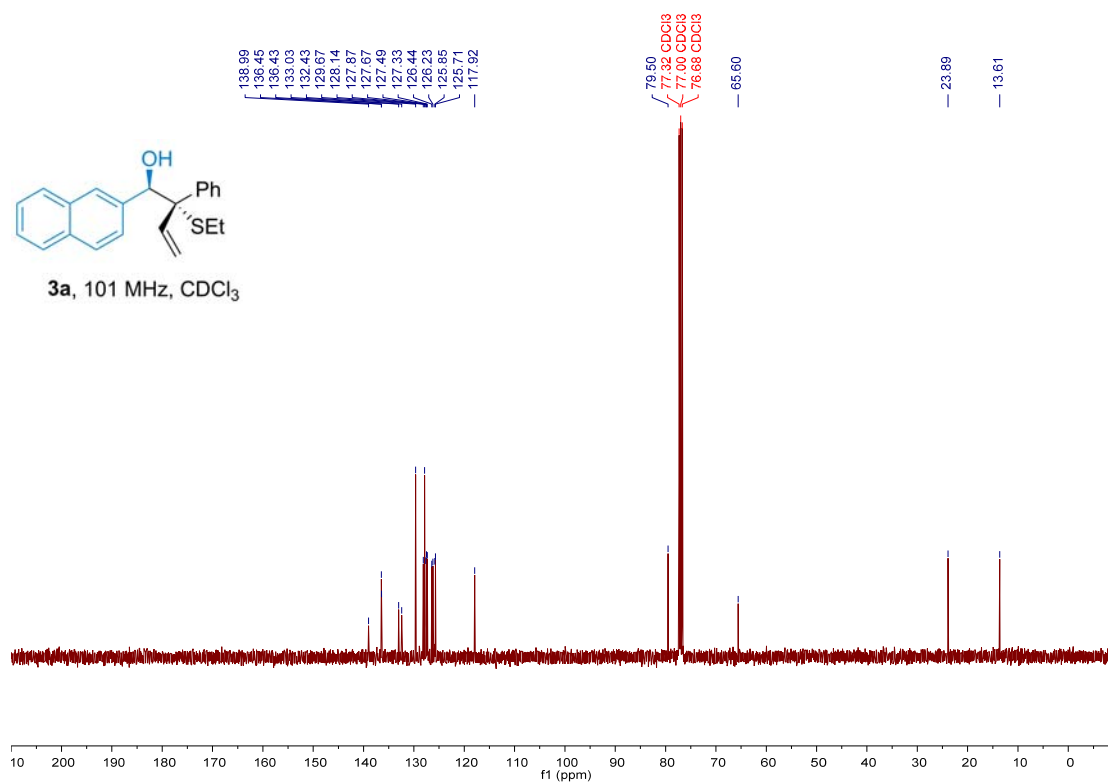

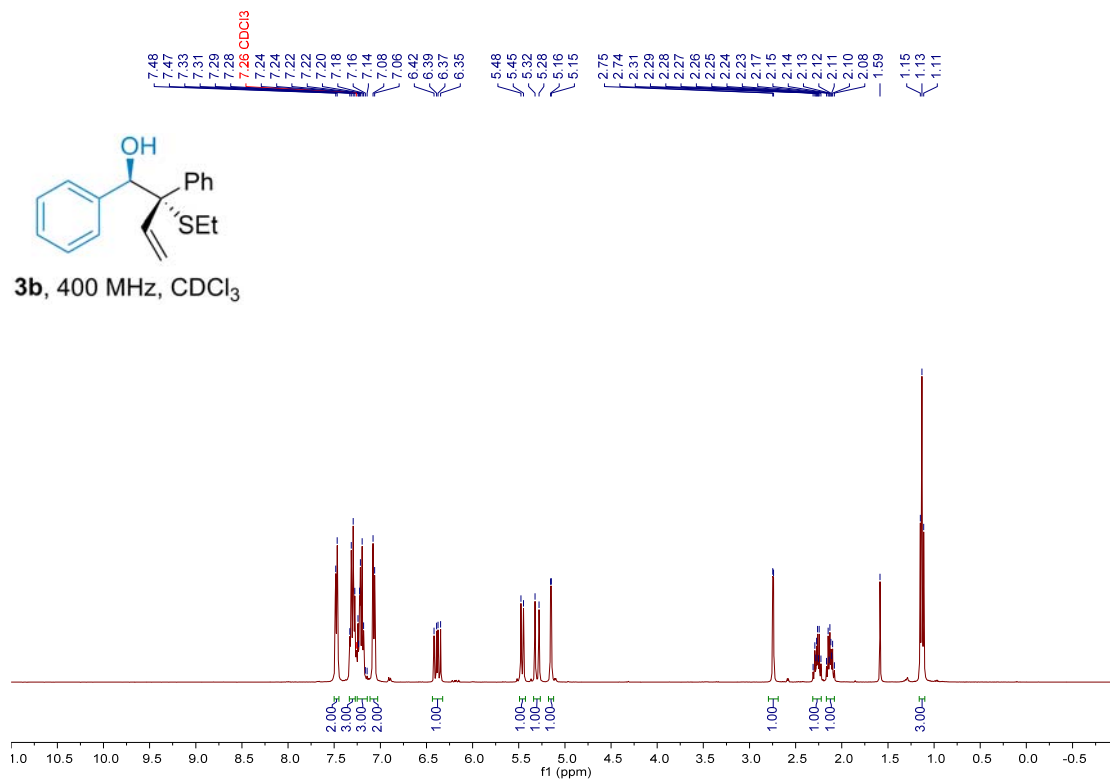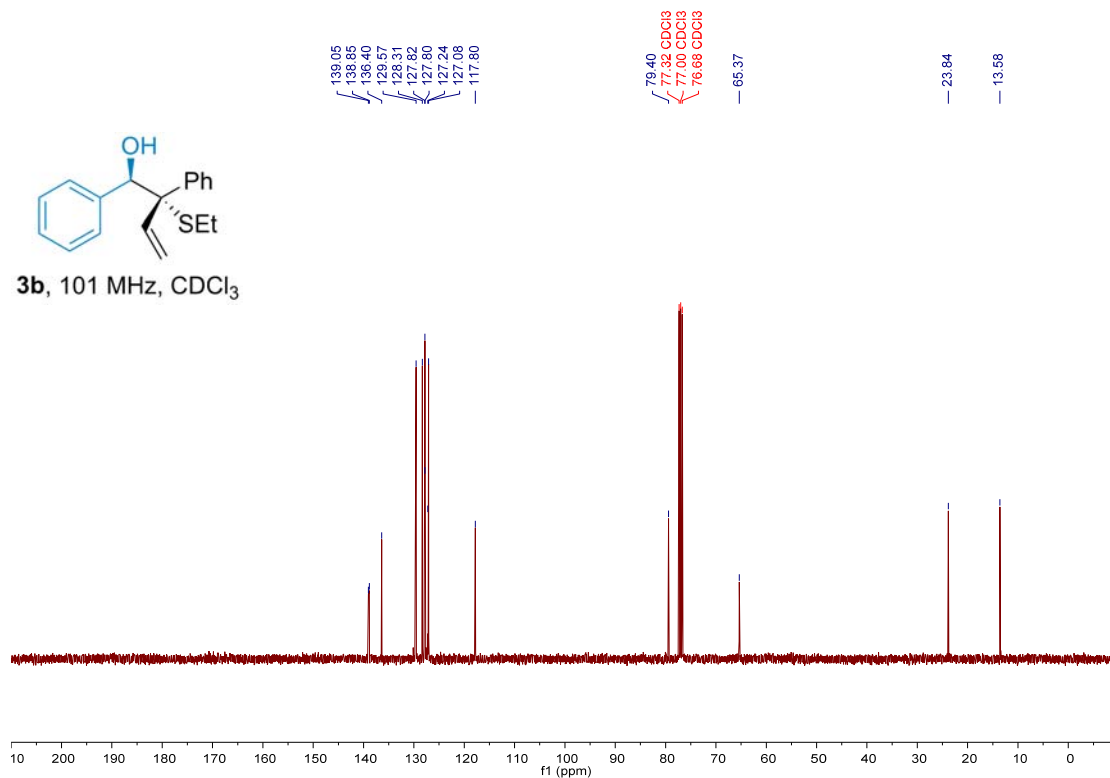

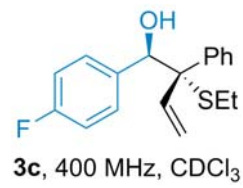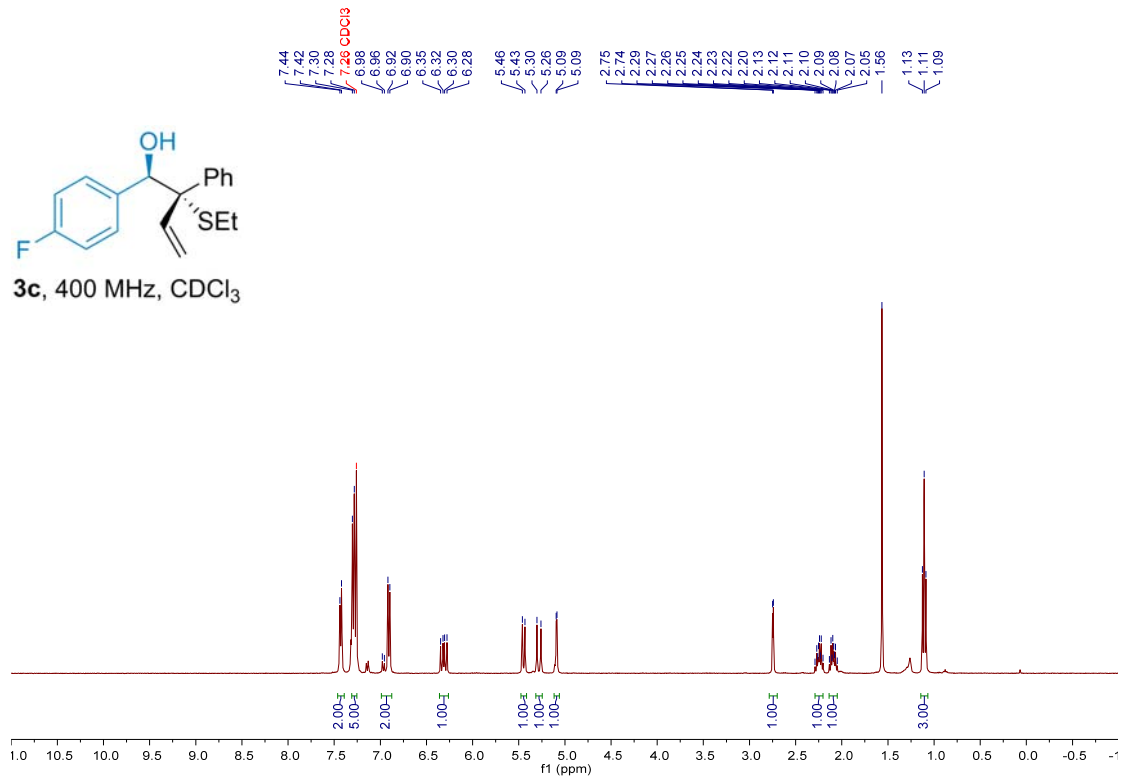

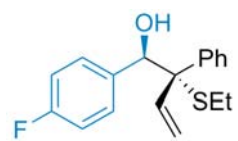

**3c**, 377 MHz, CDCl<sub>3</sub>

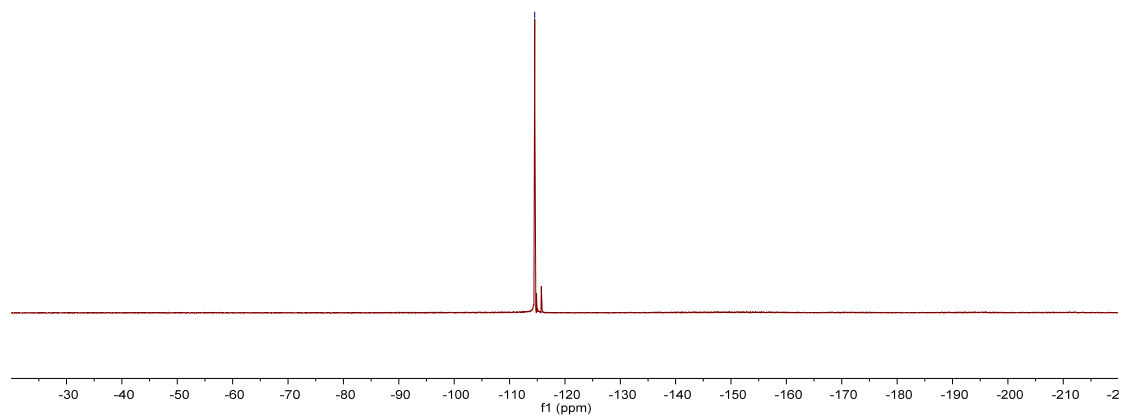

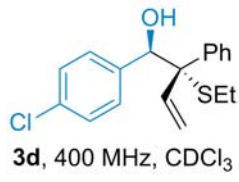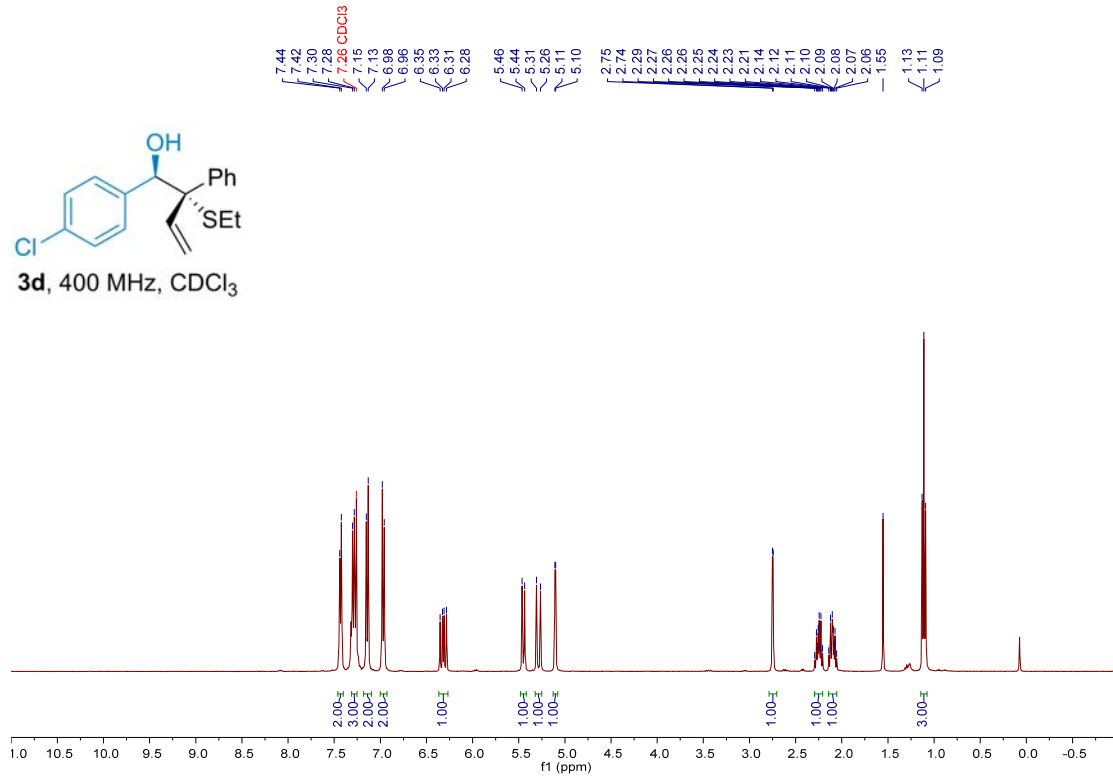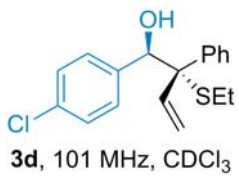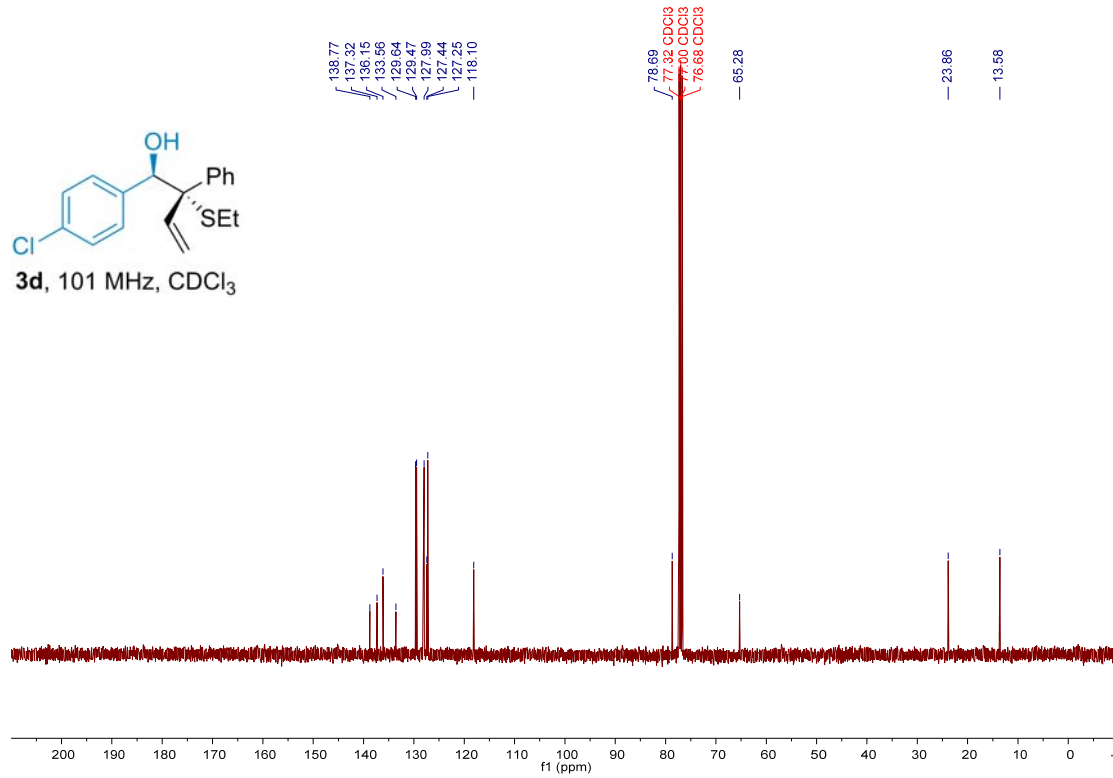

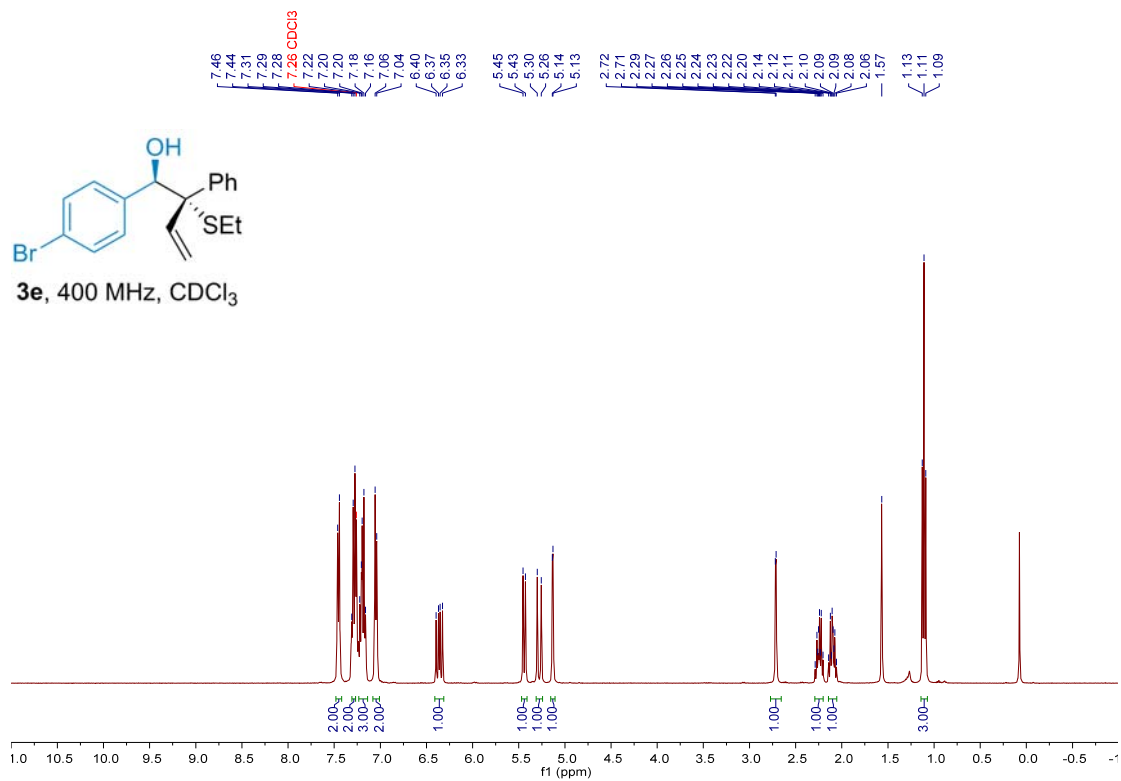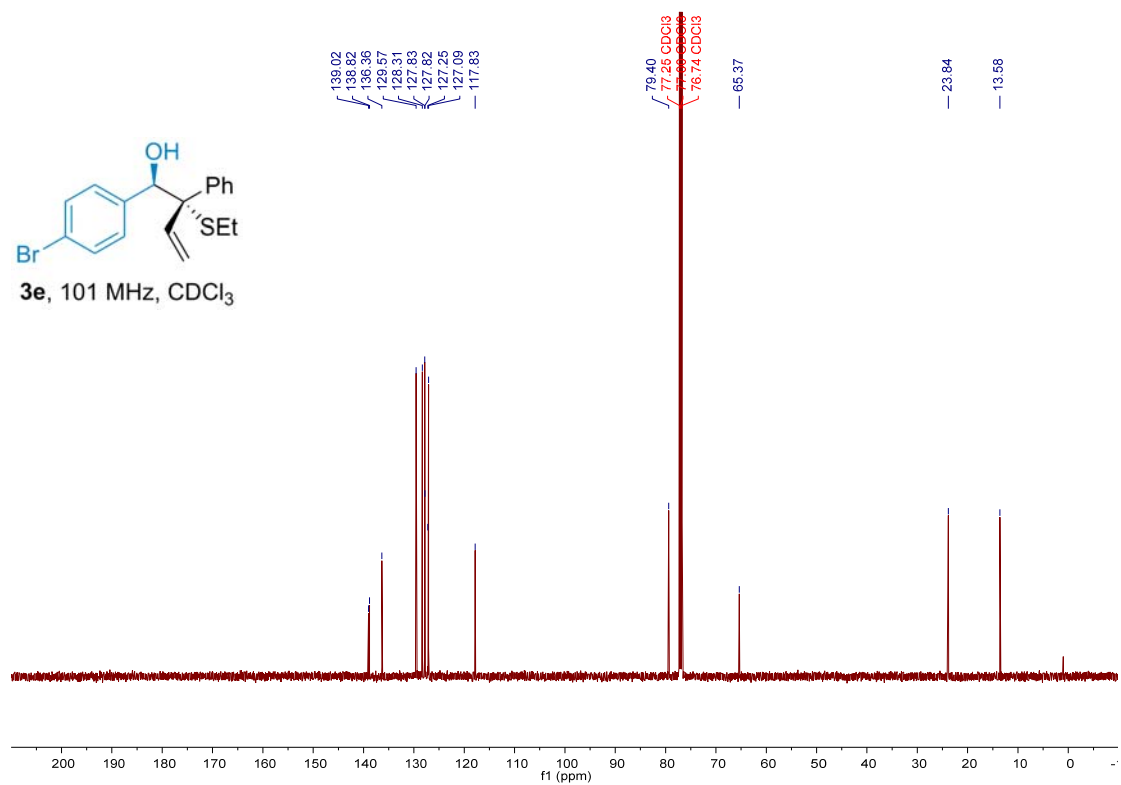

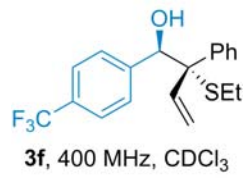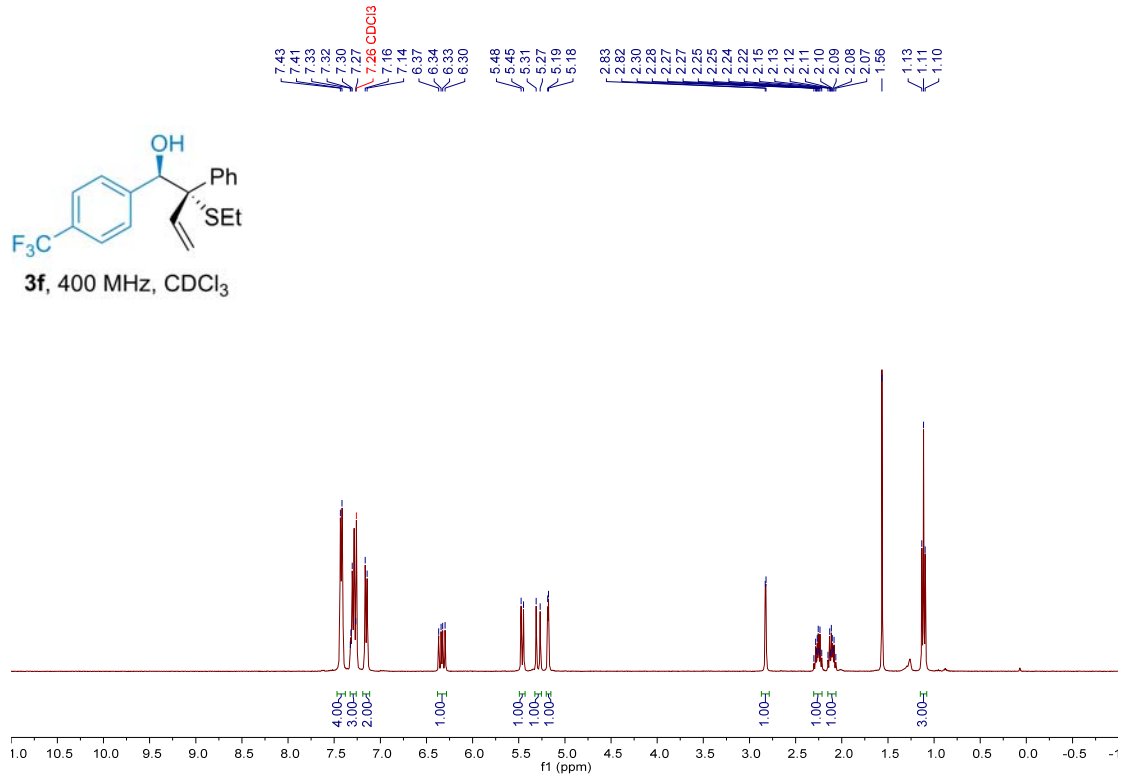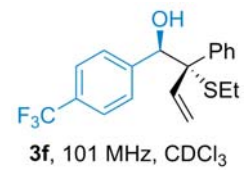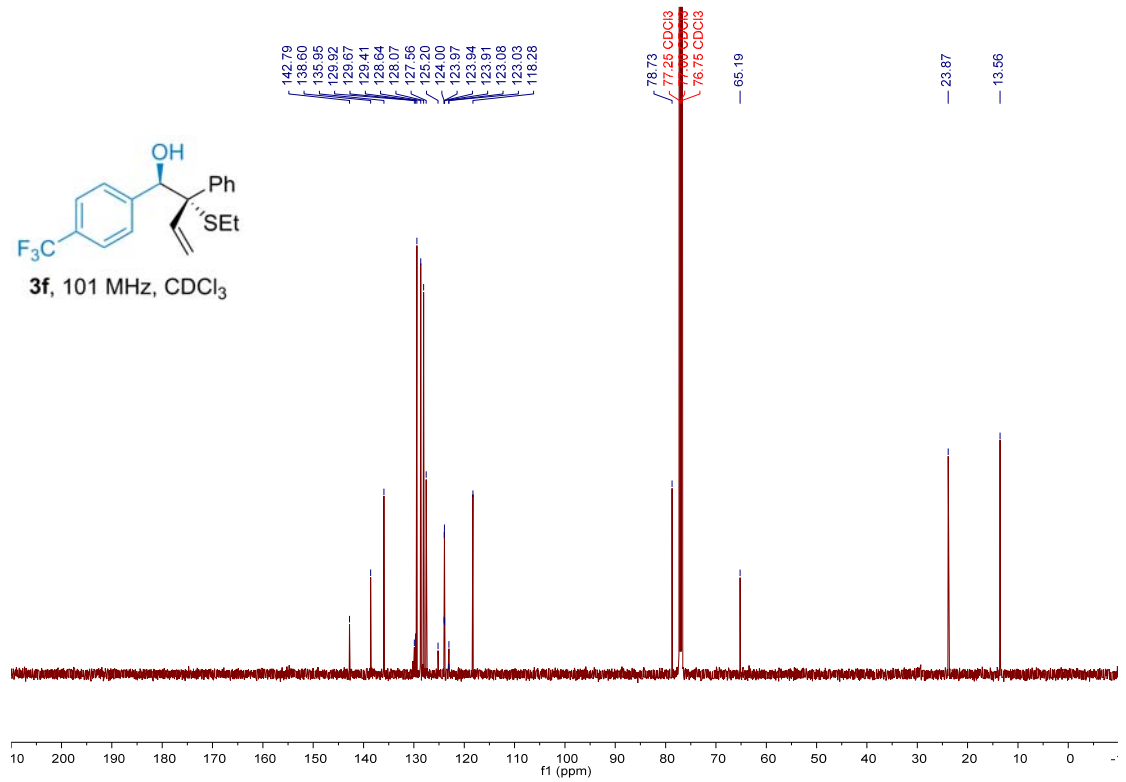

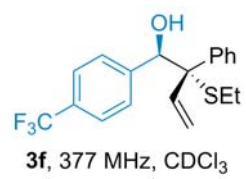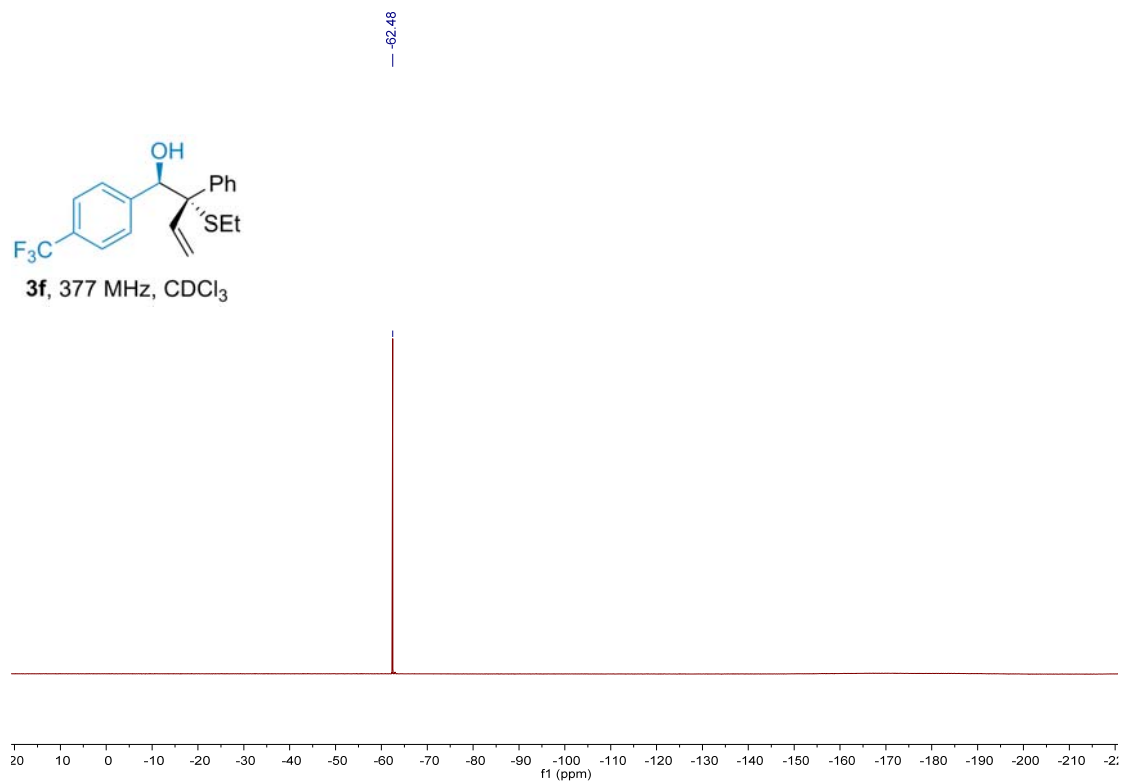

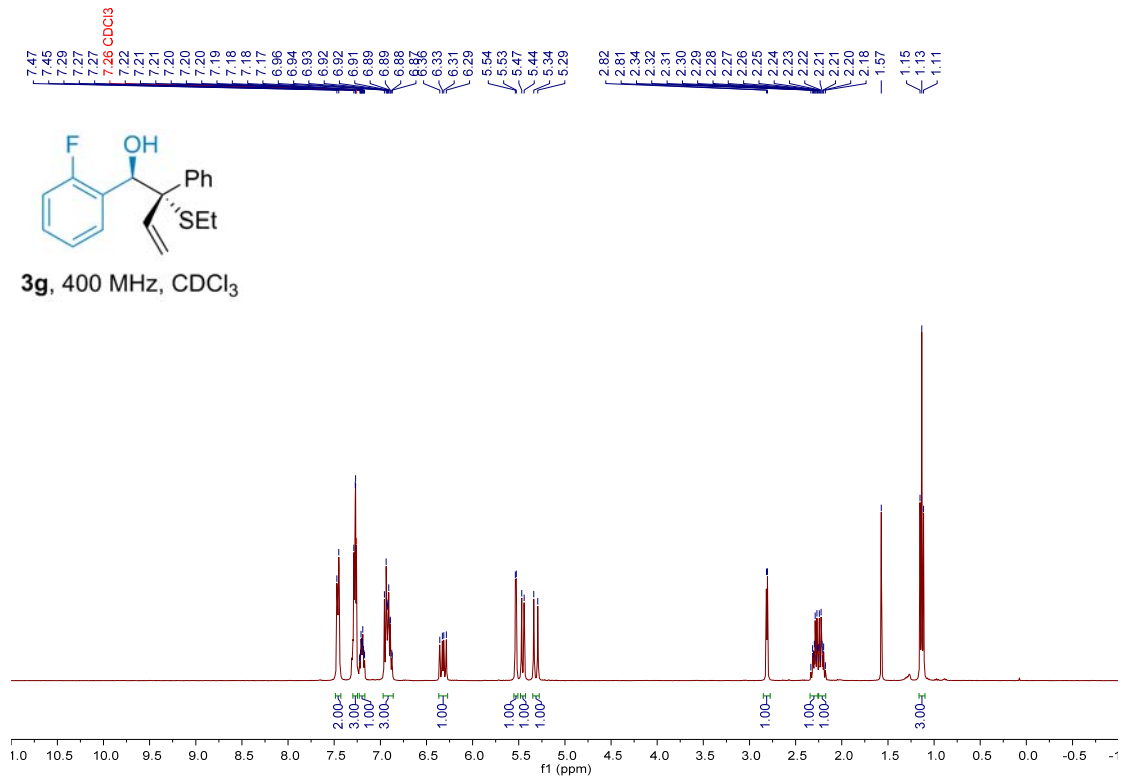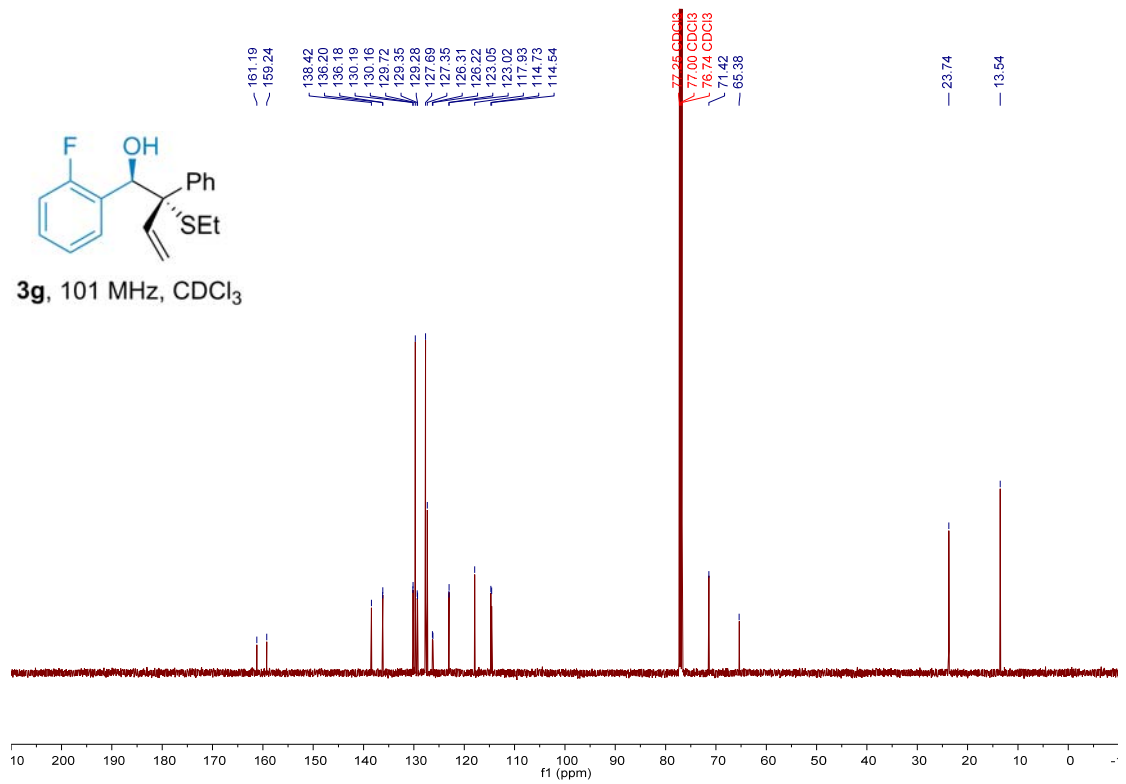

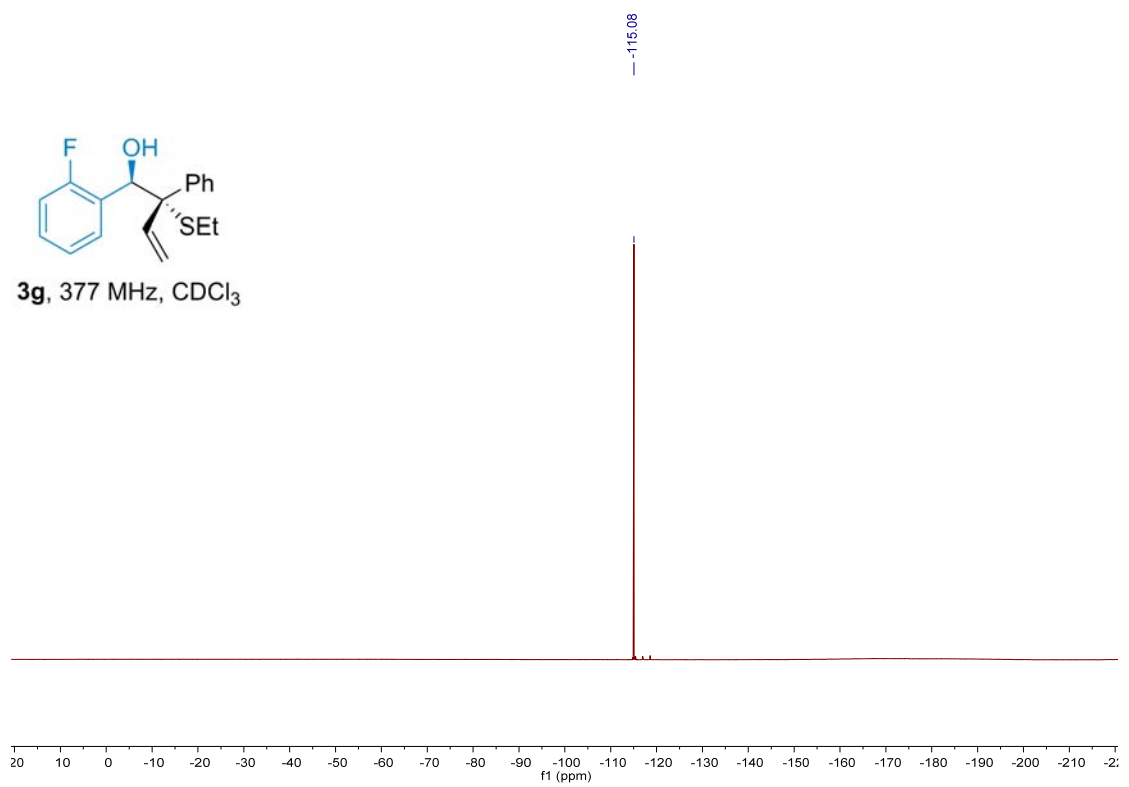

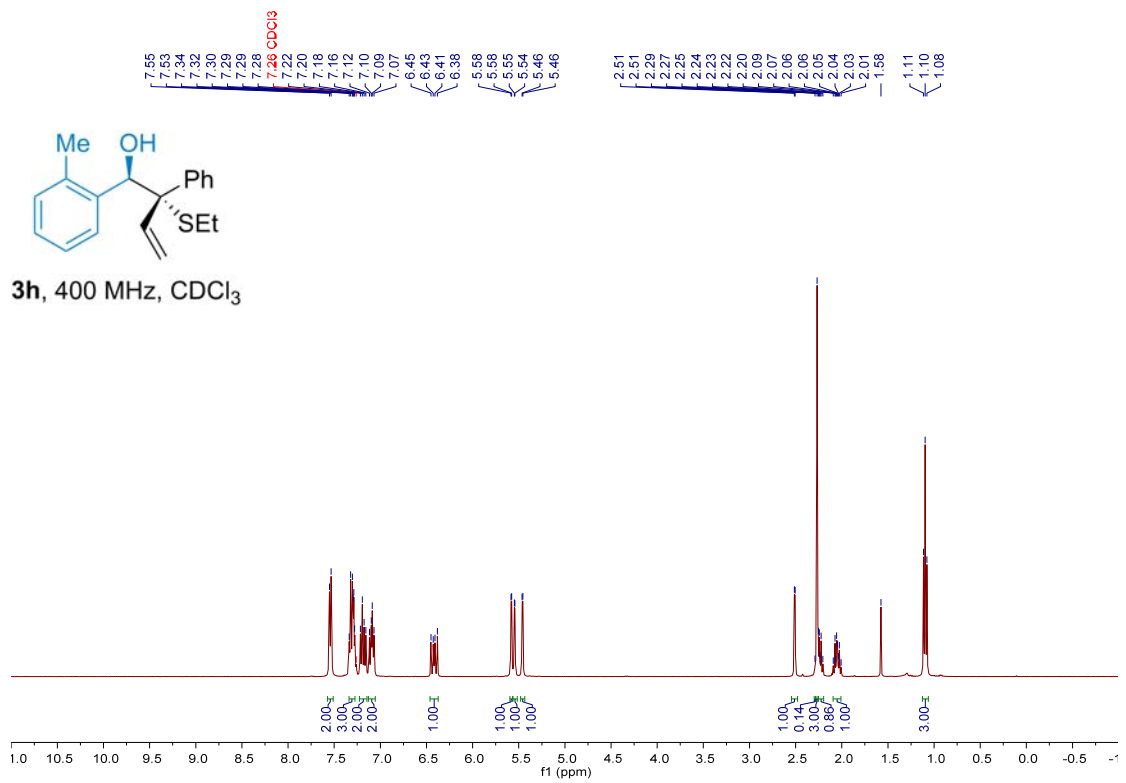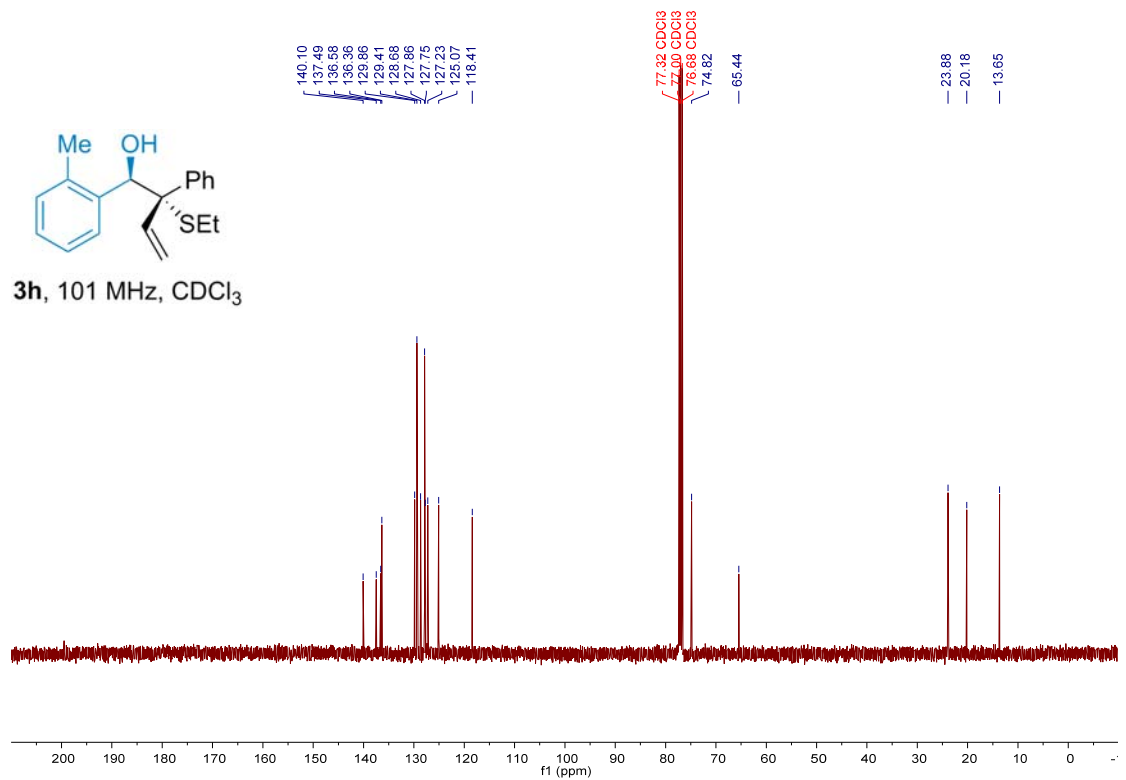

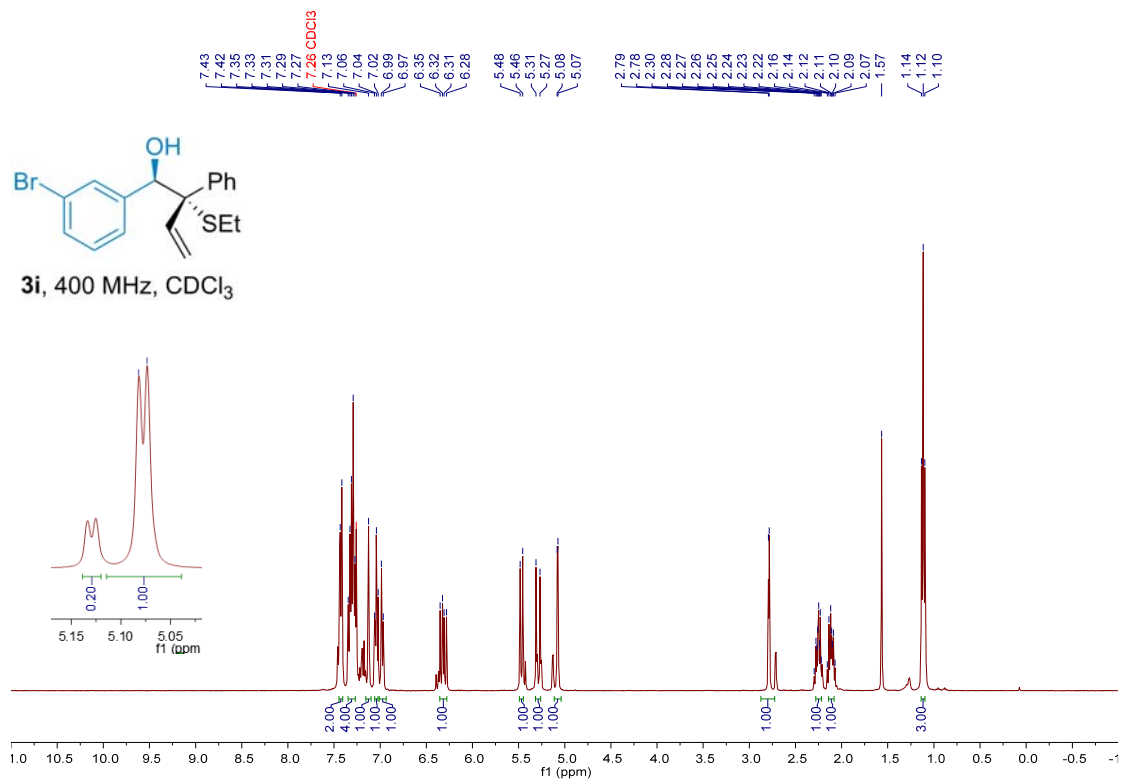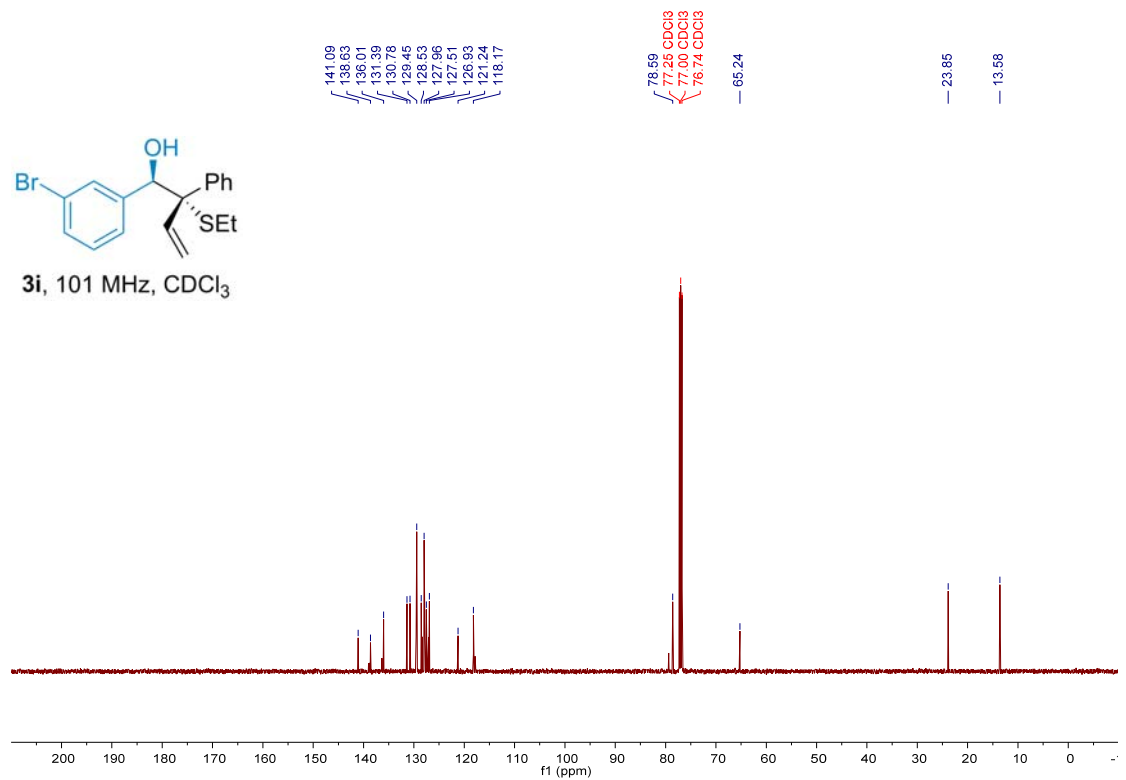

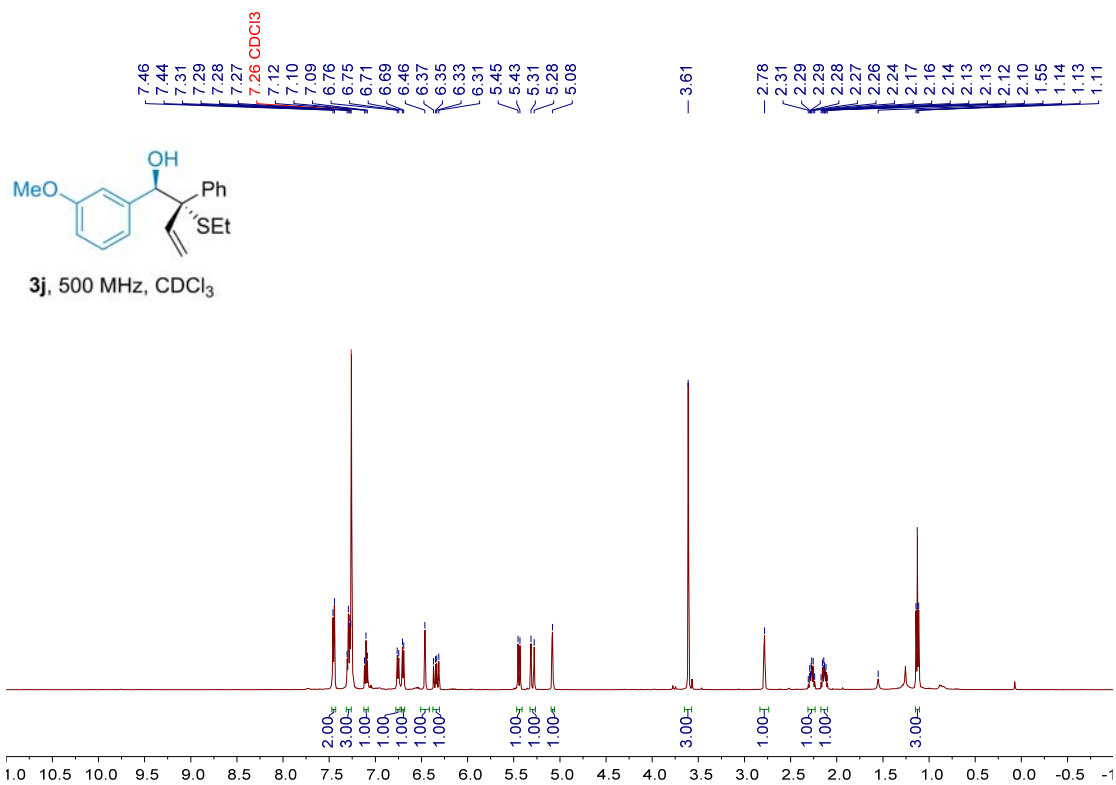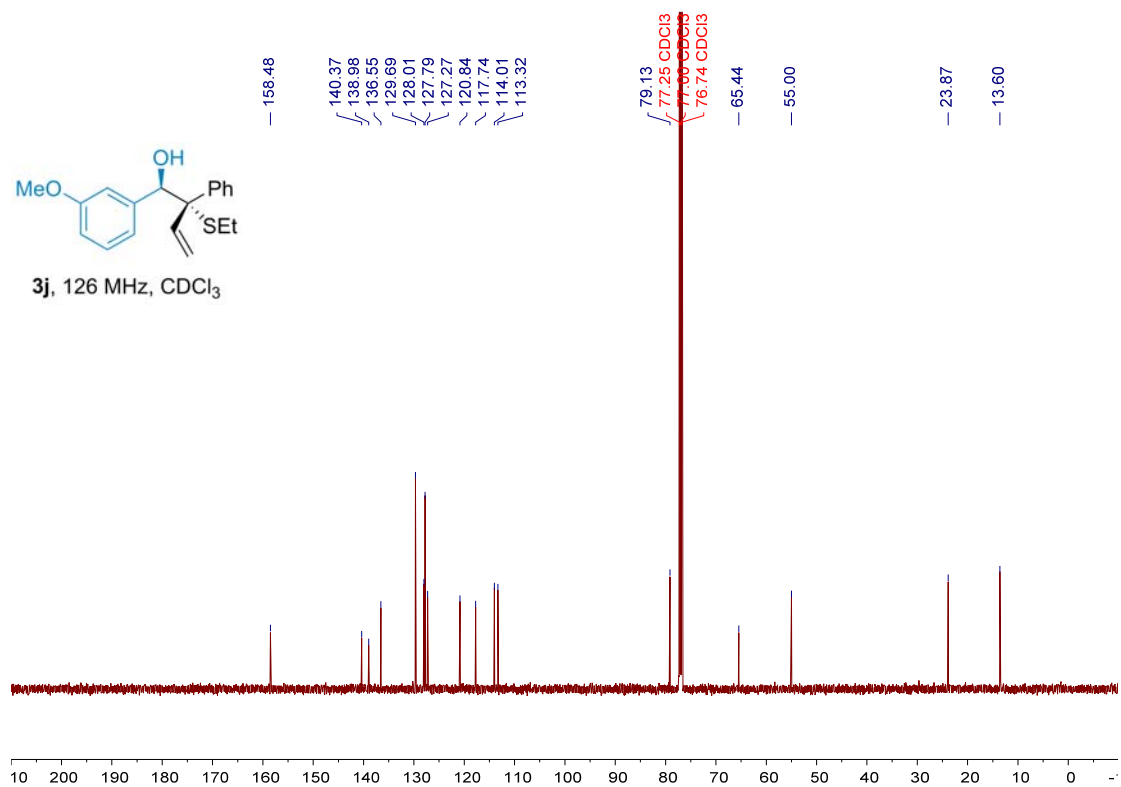

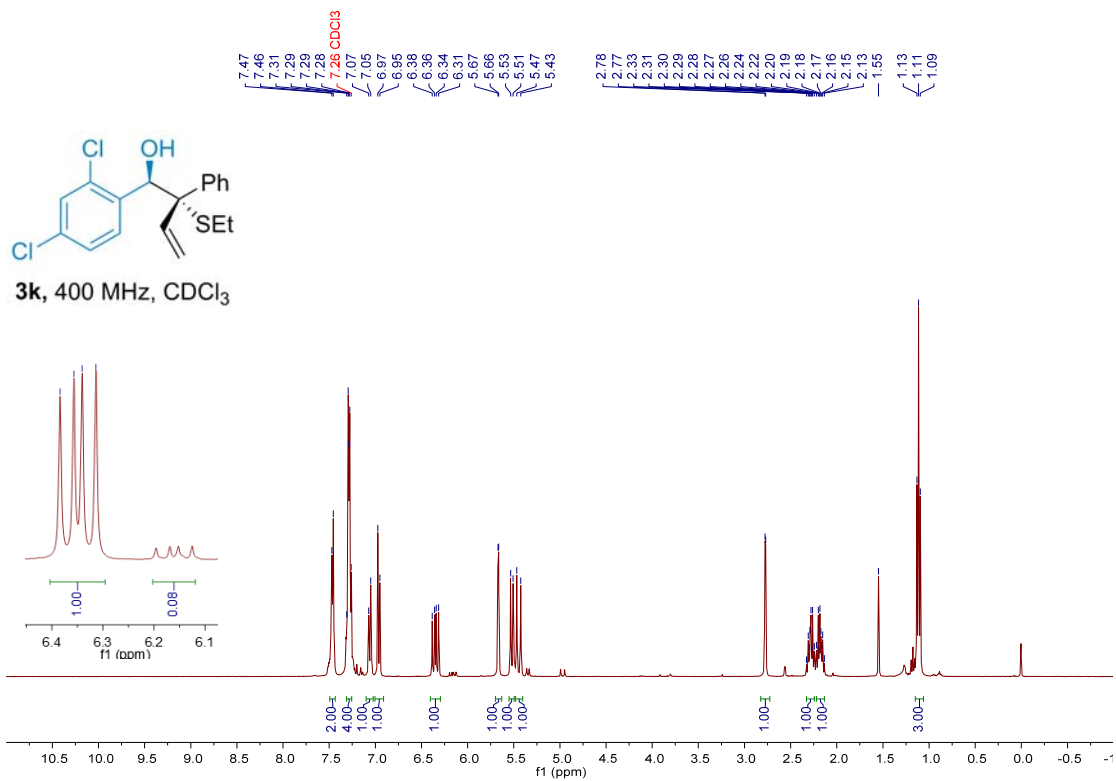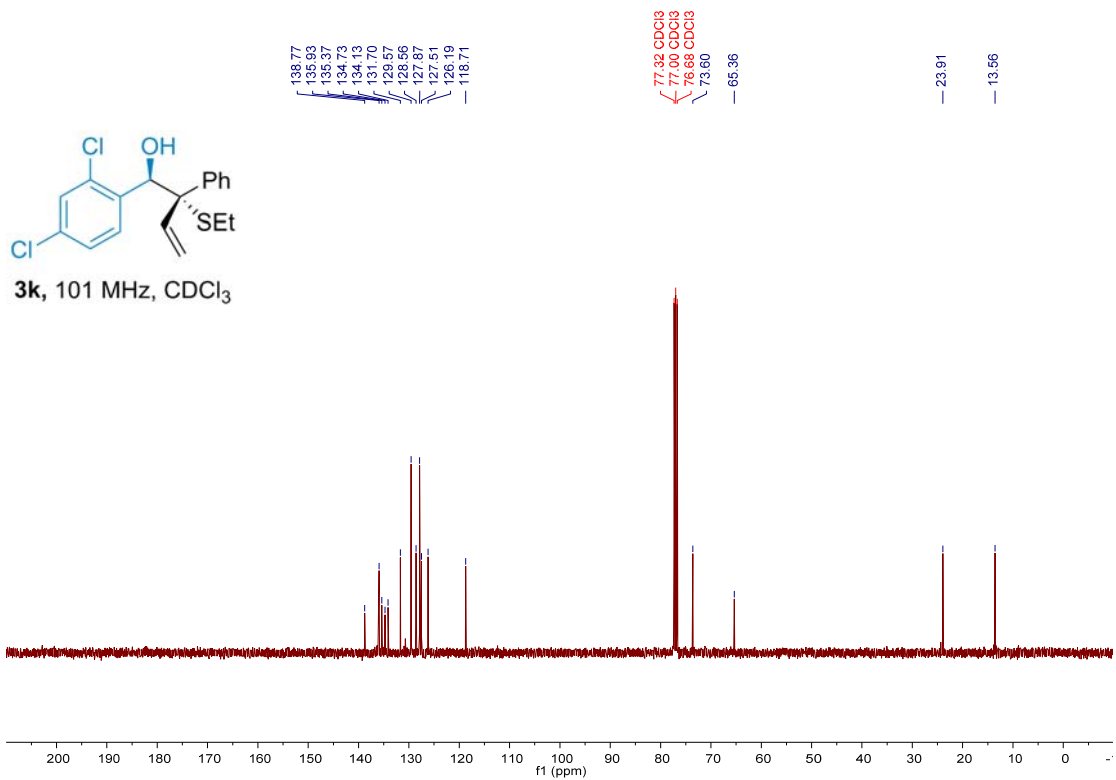

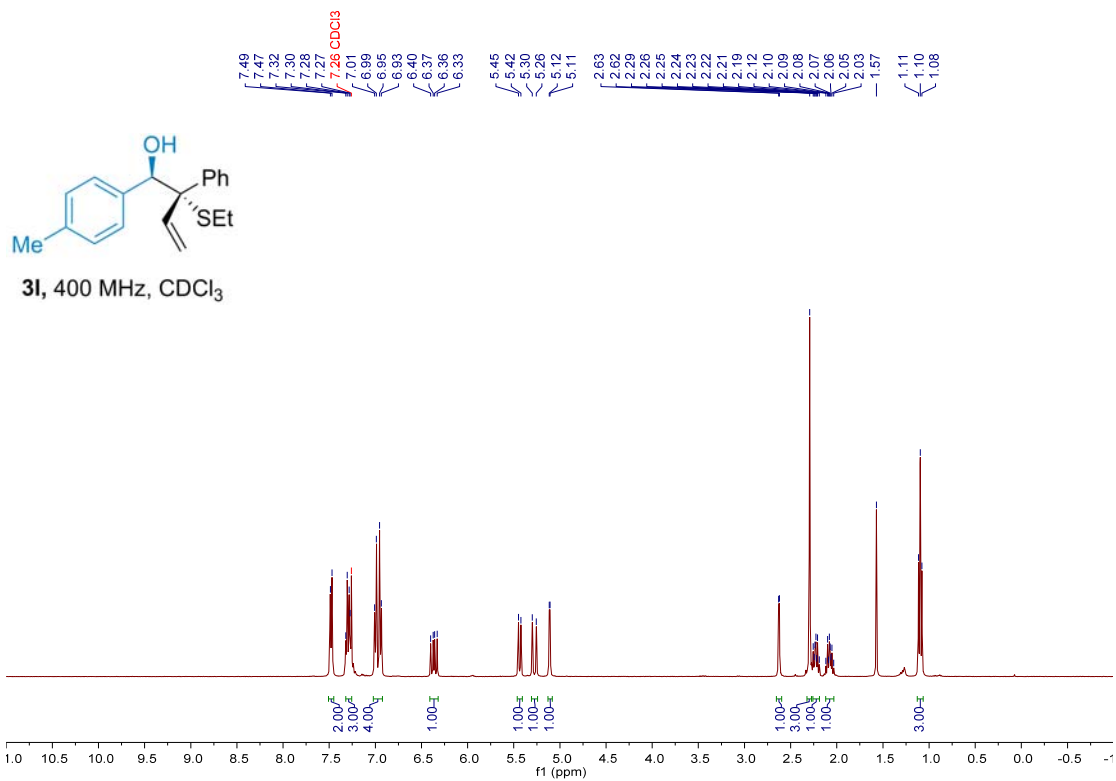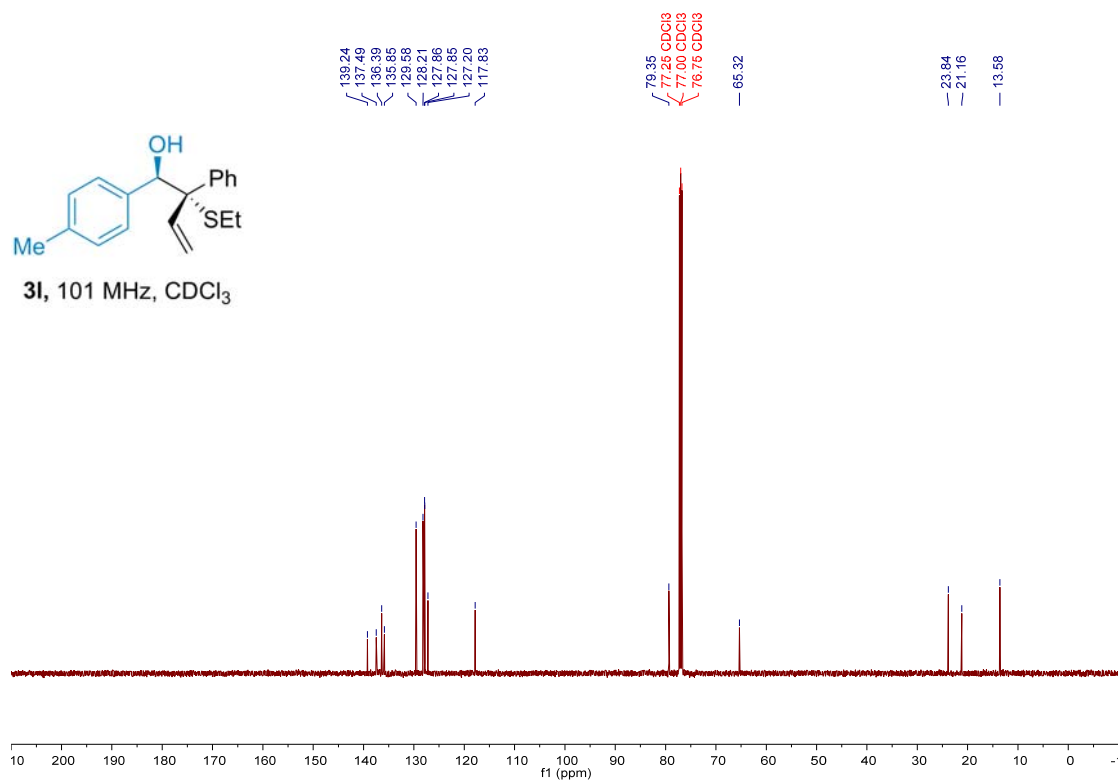

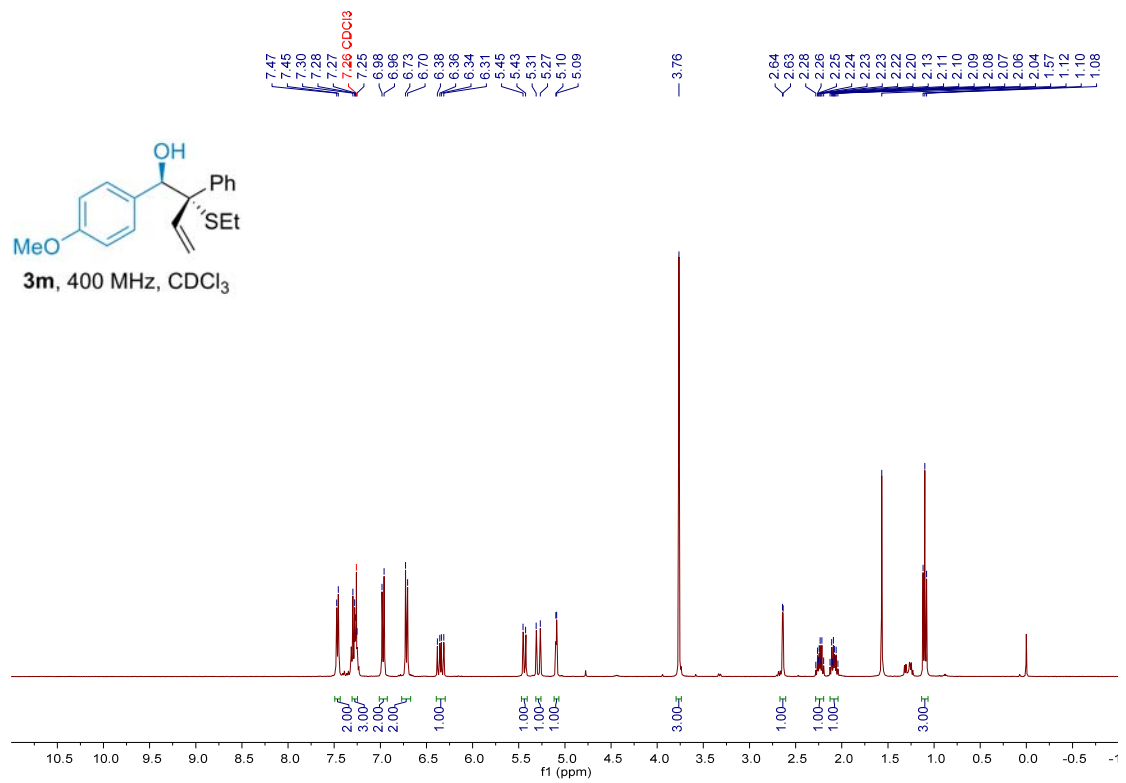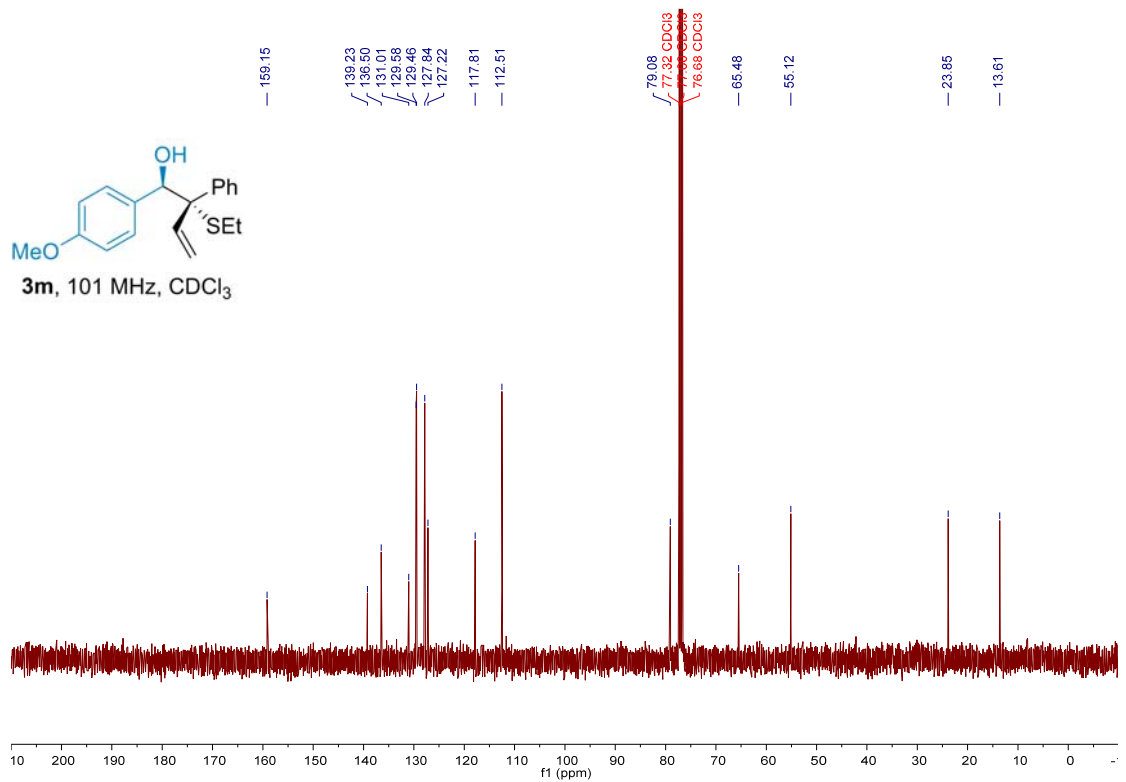

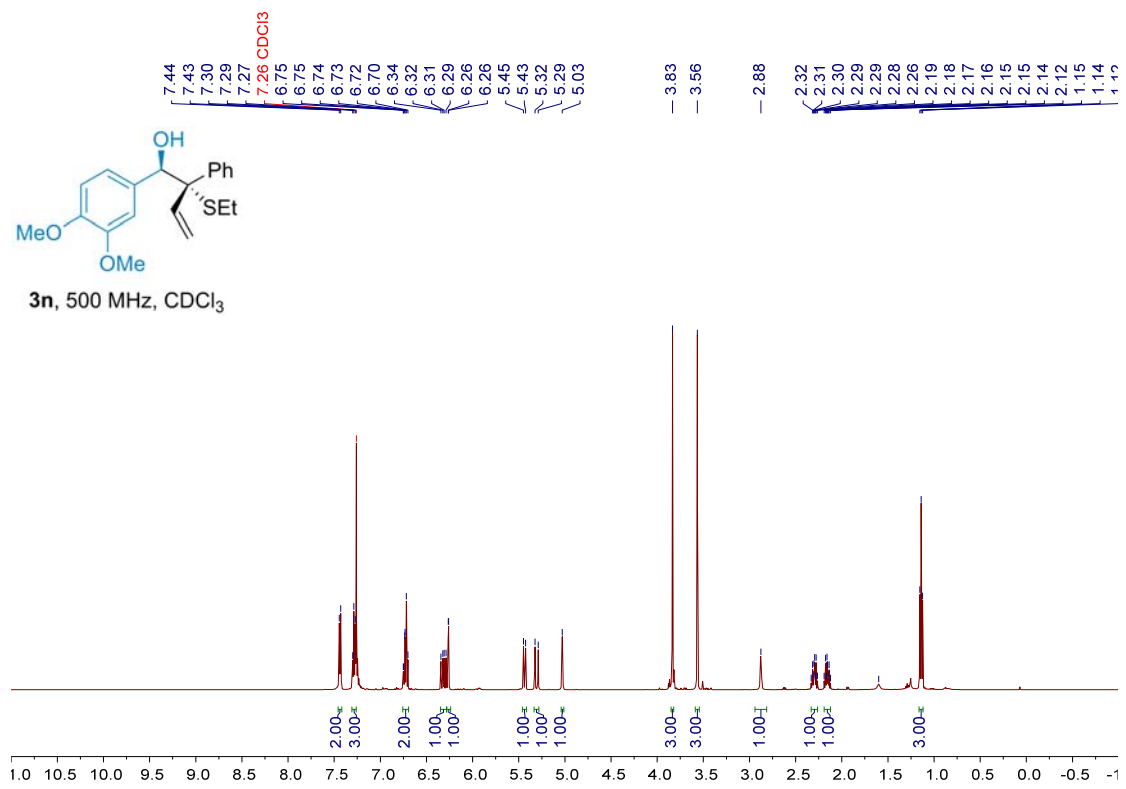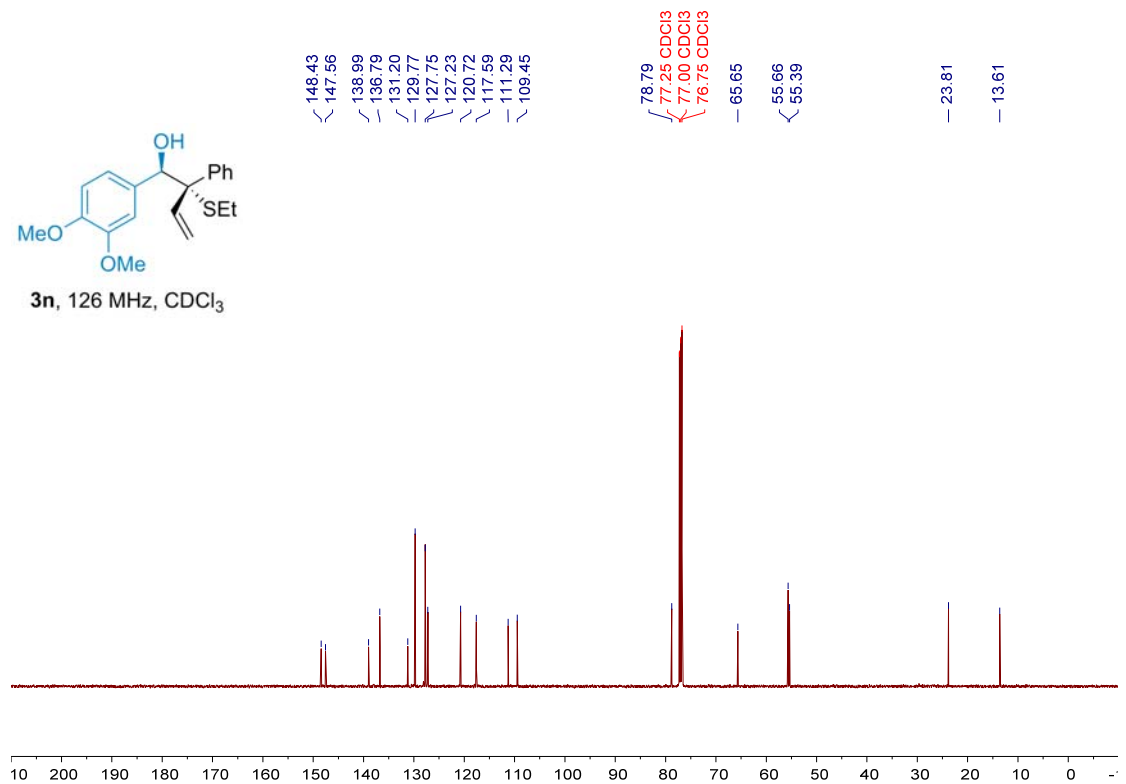

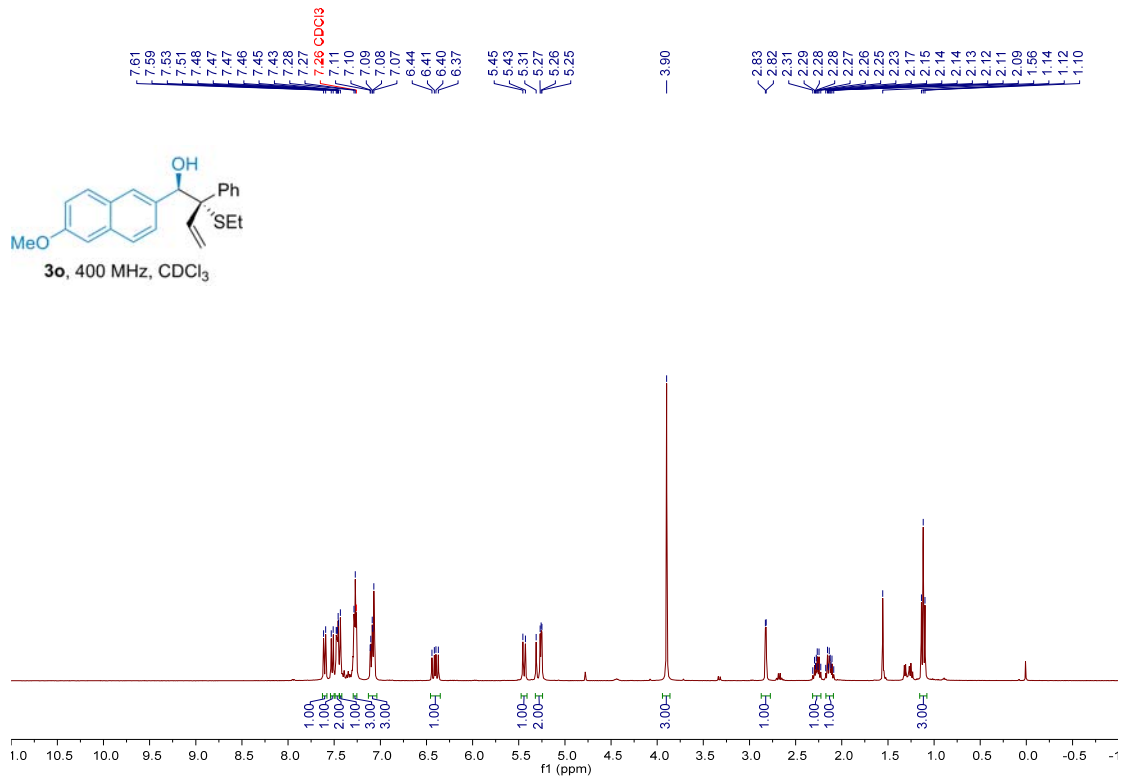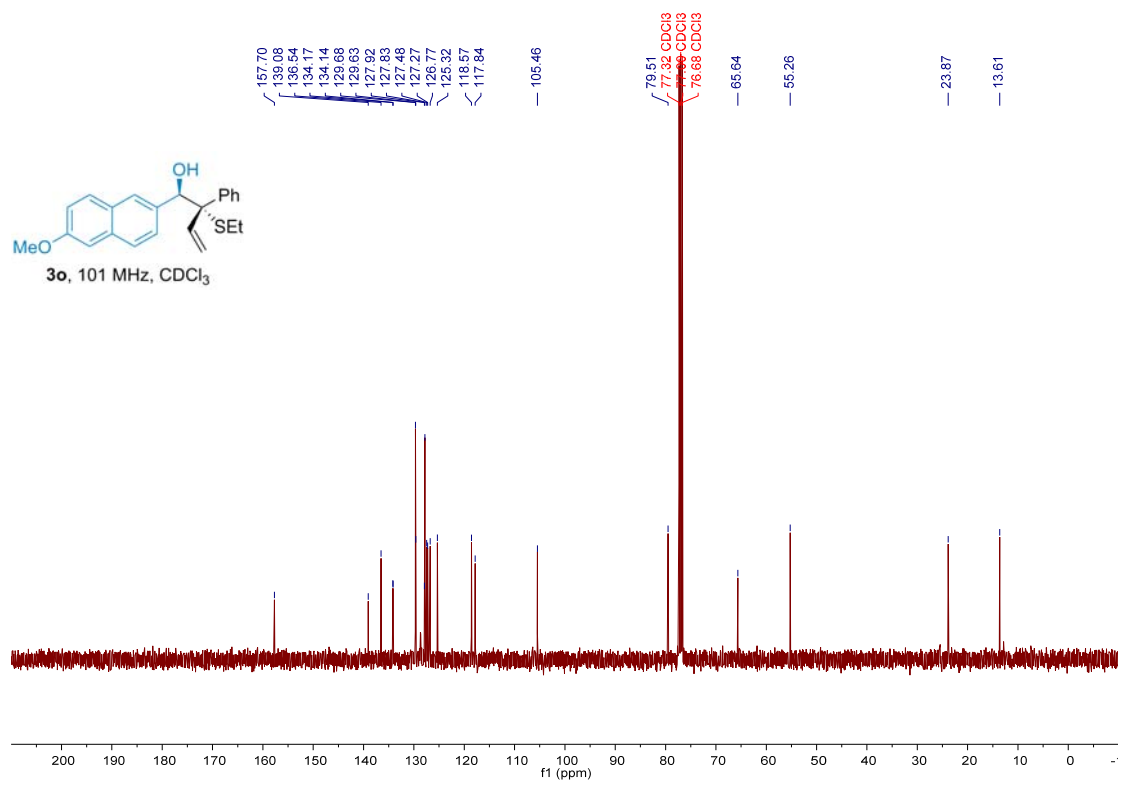

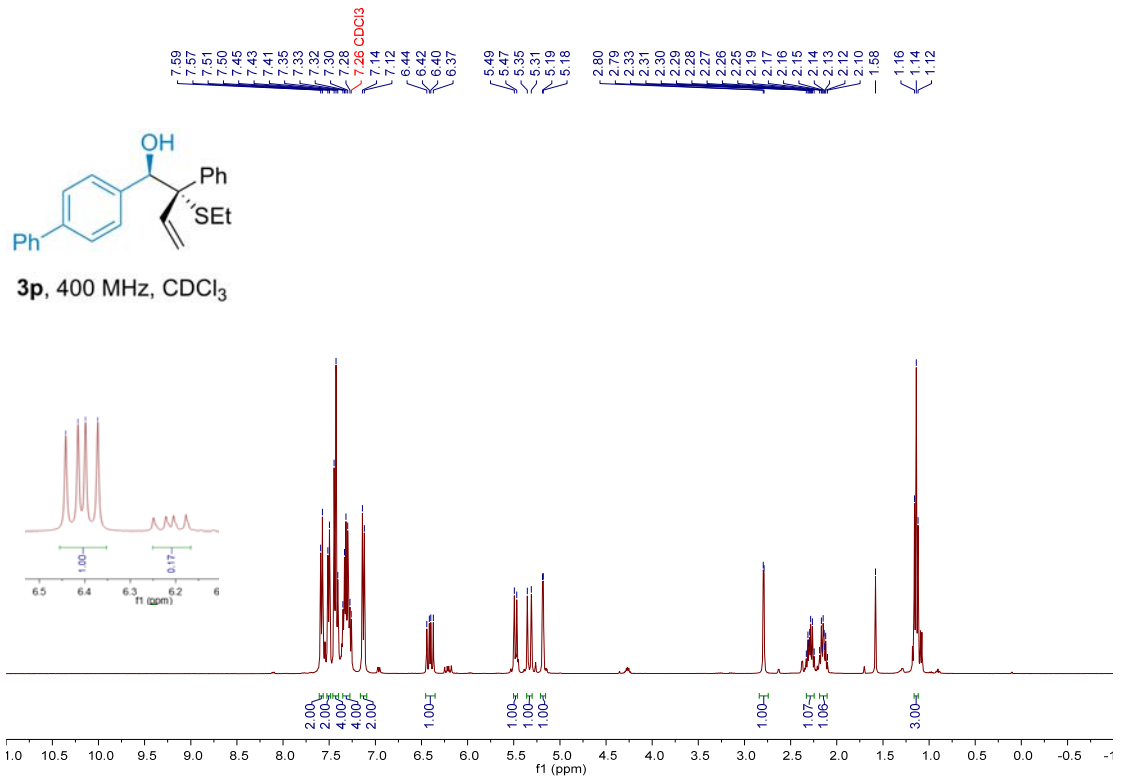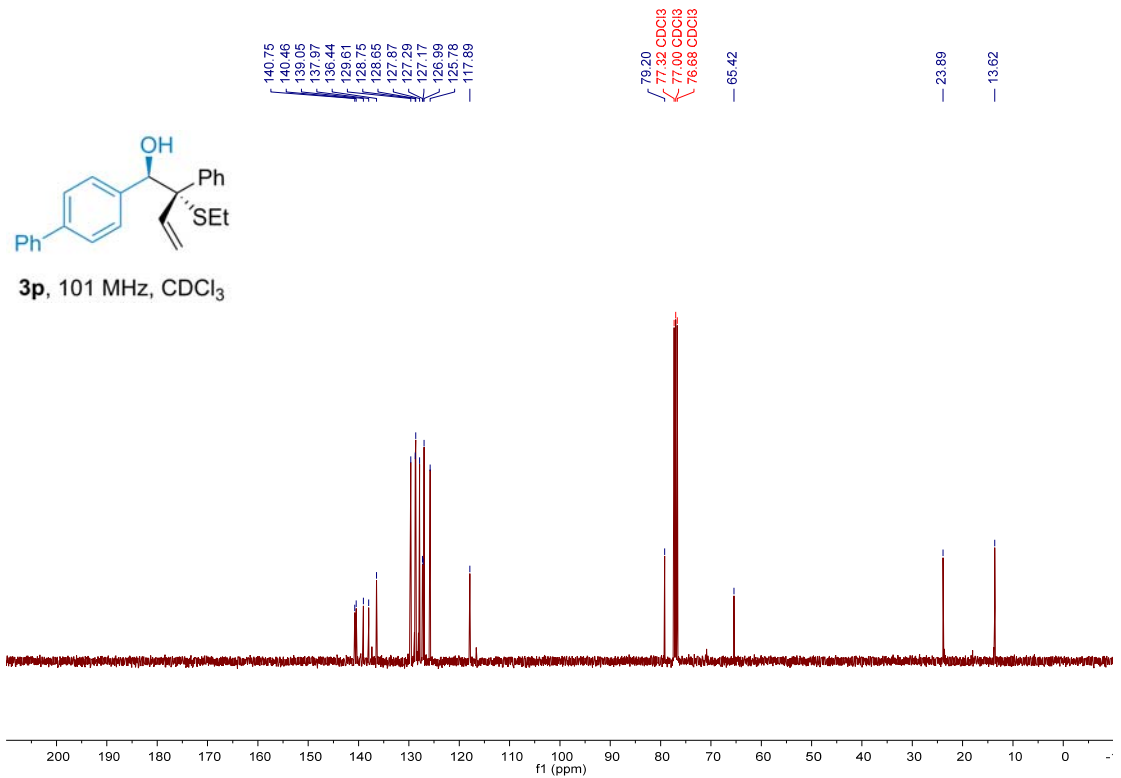

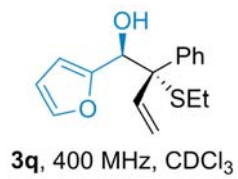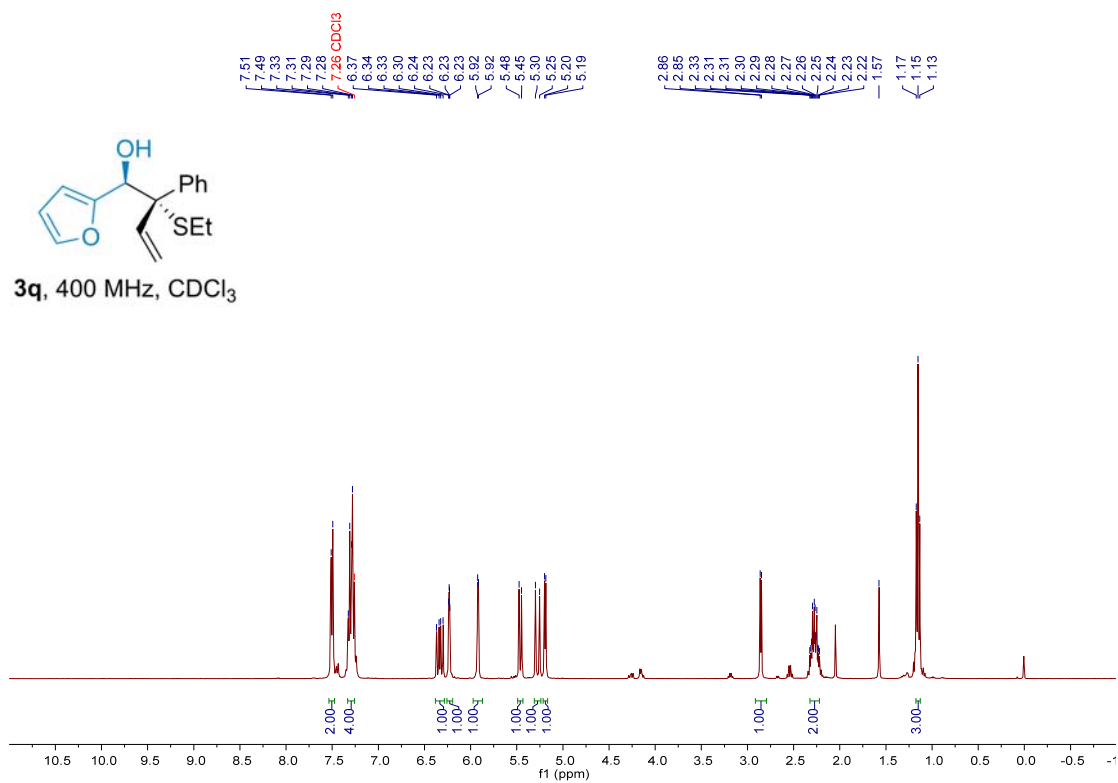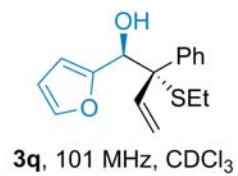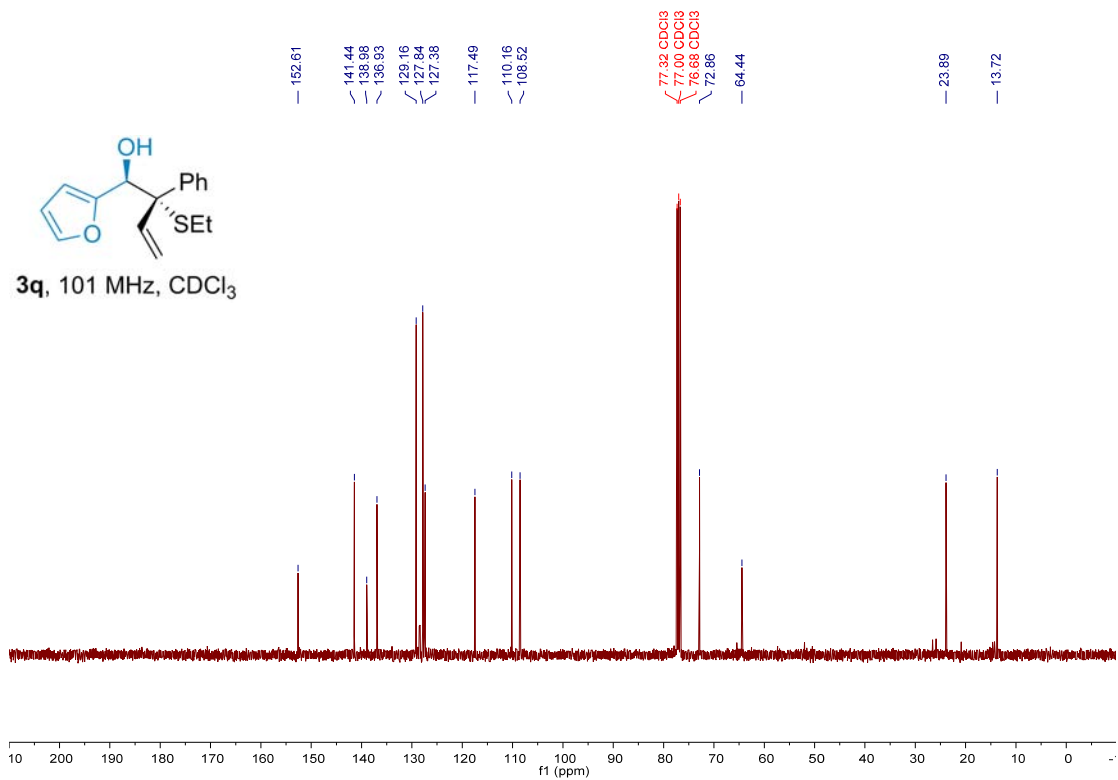

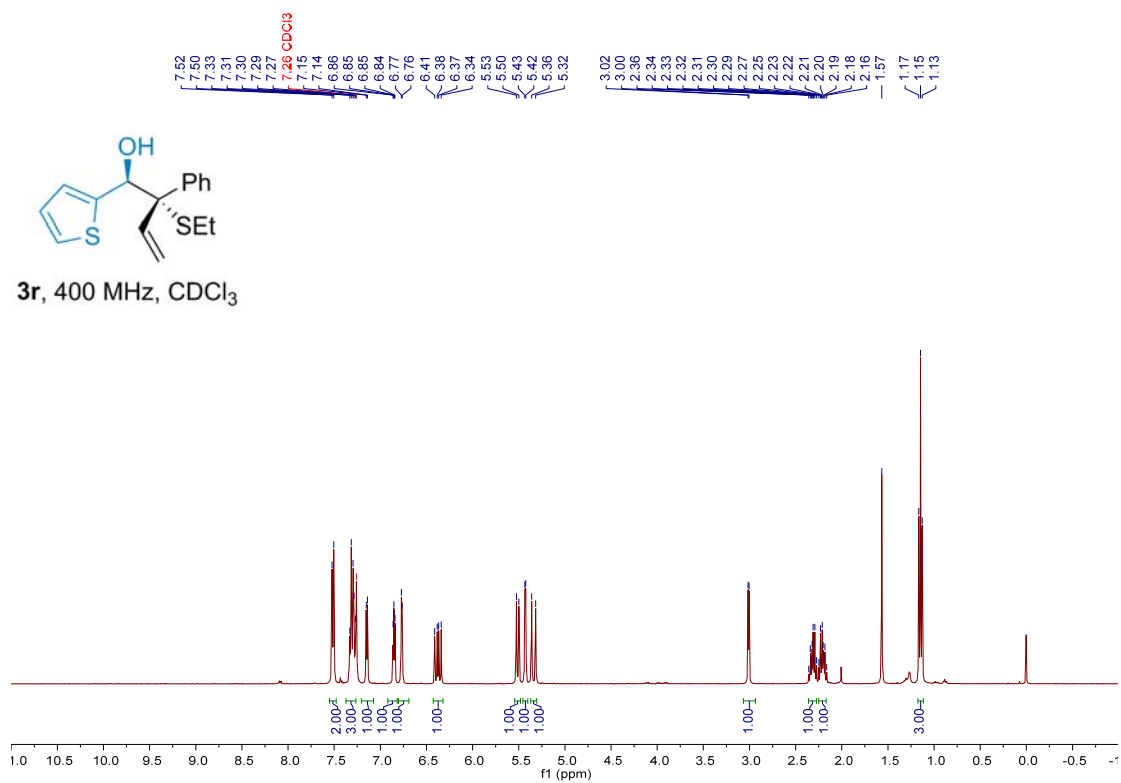

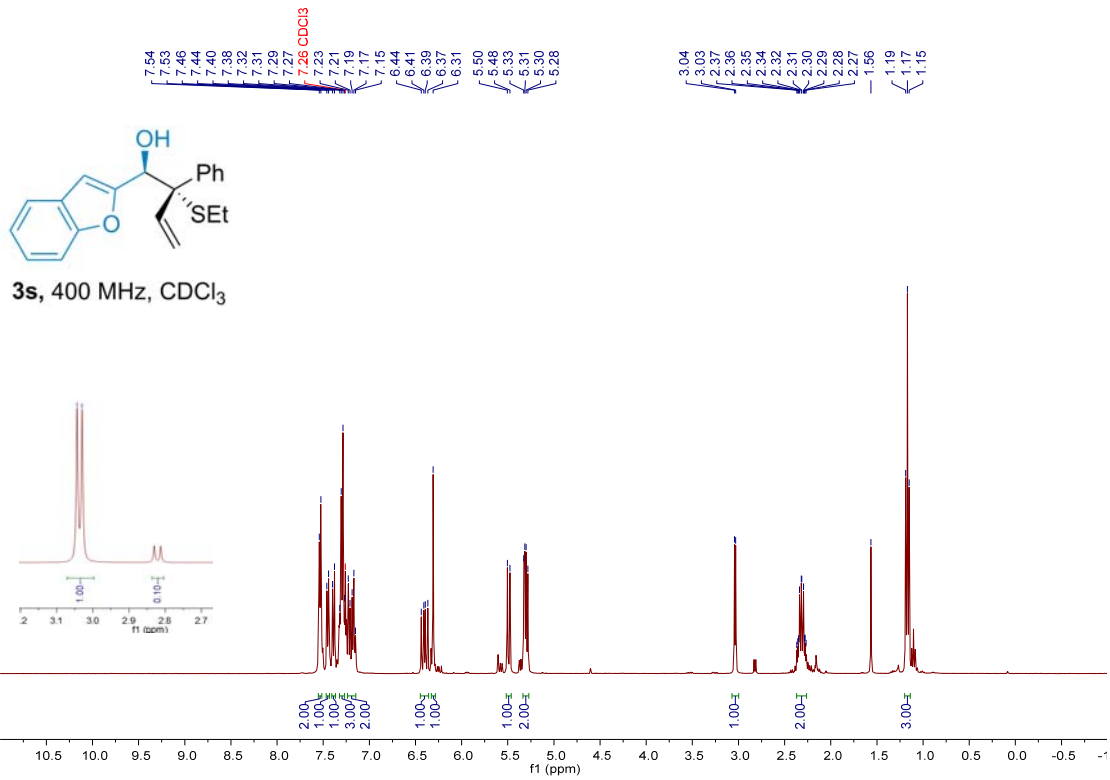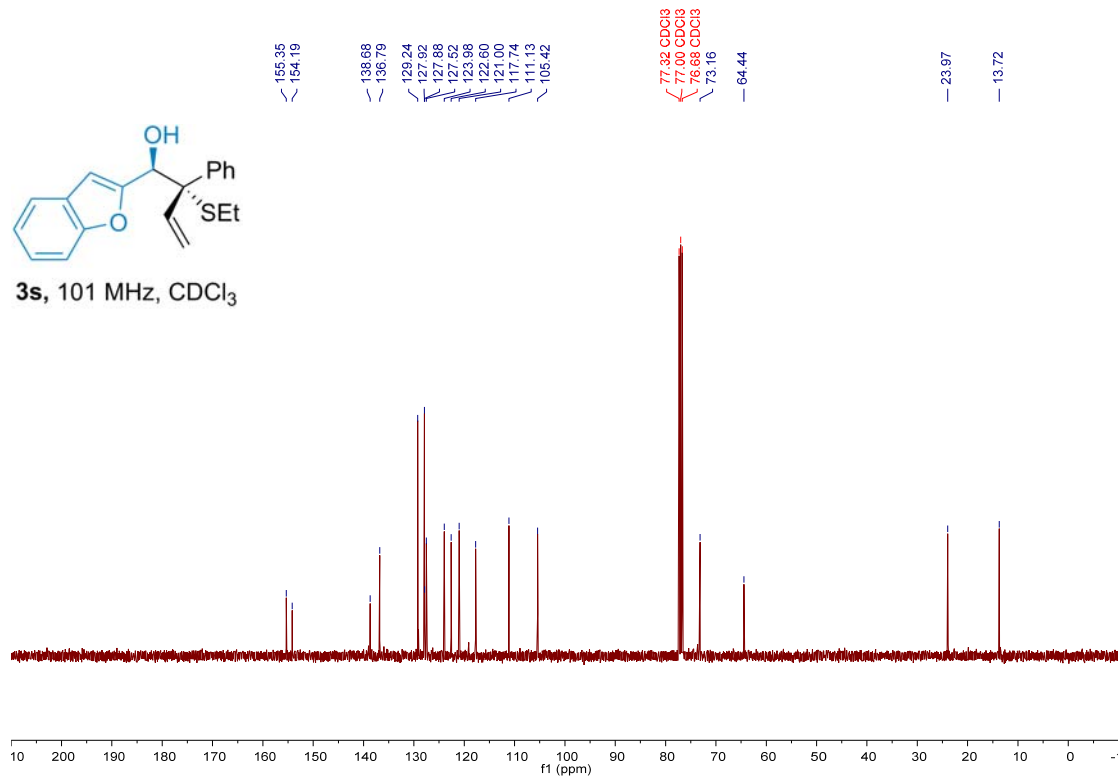

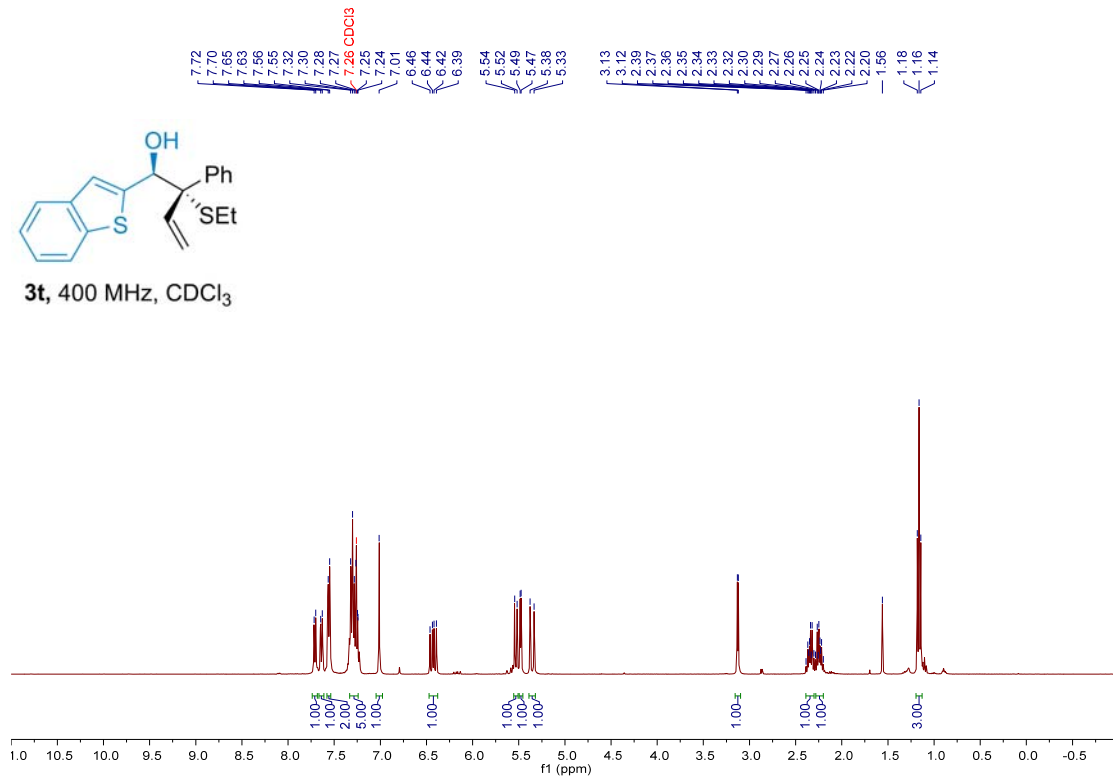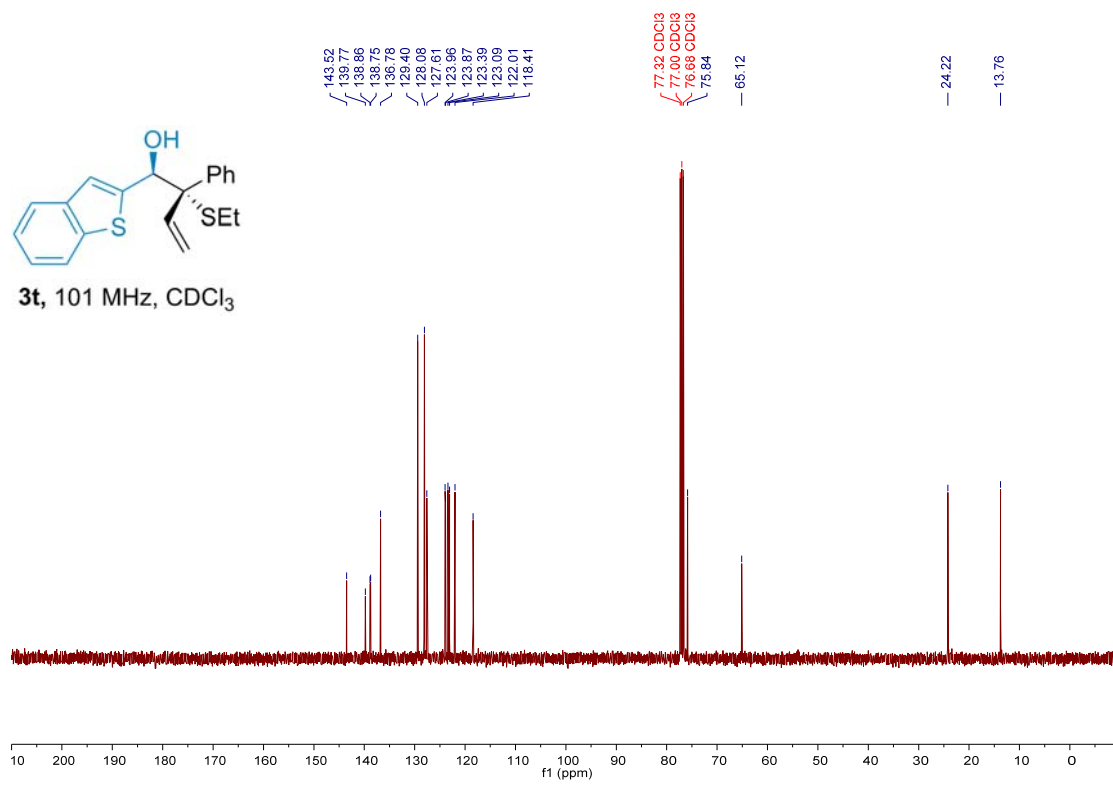

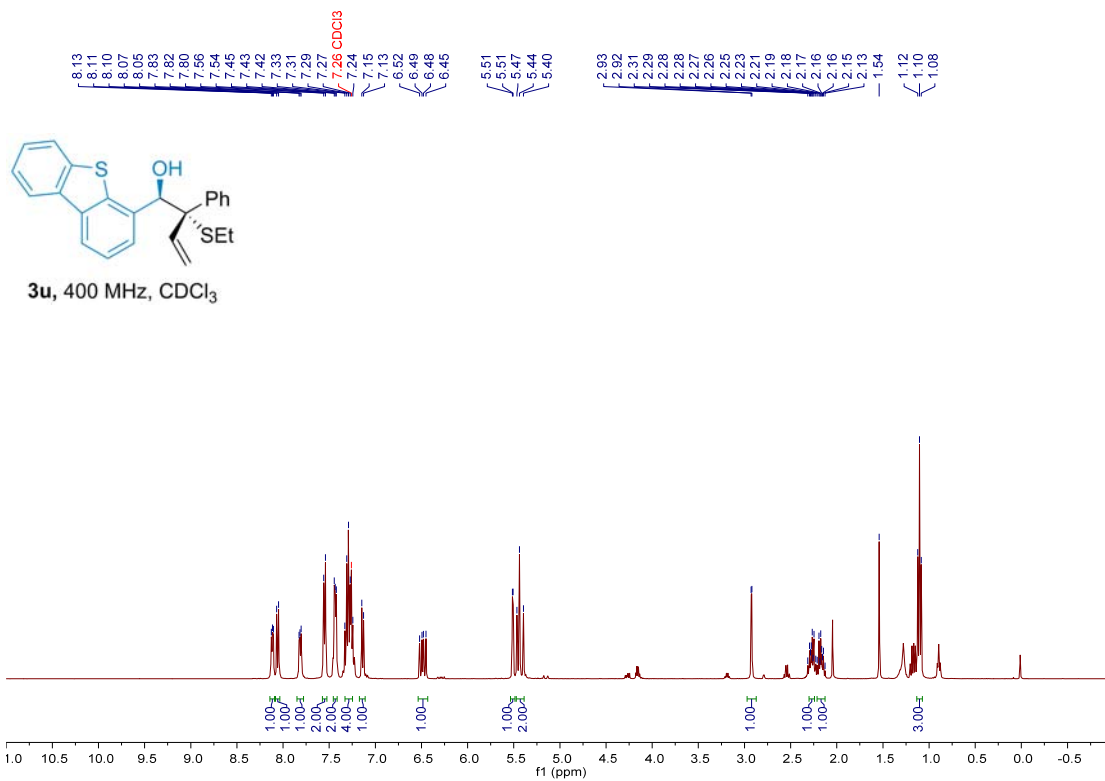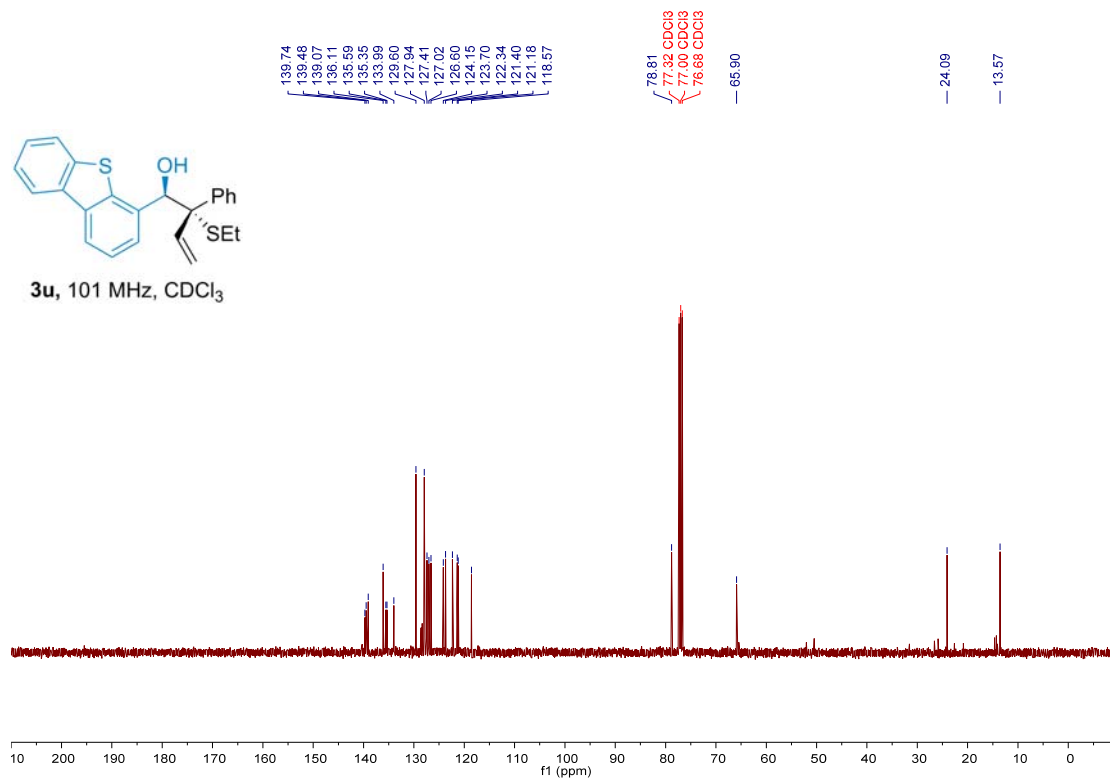



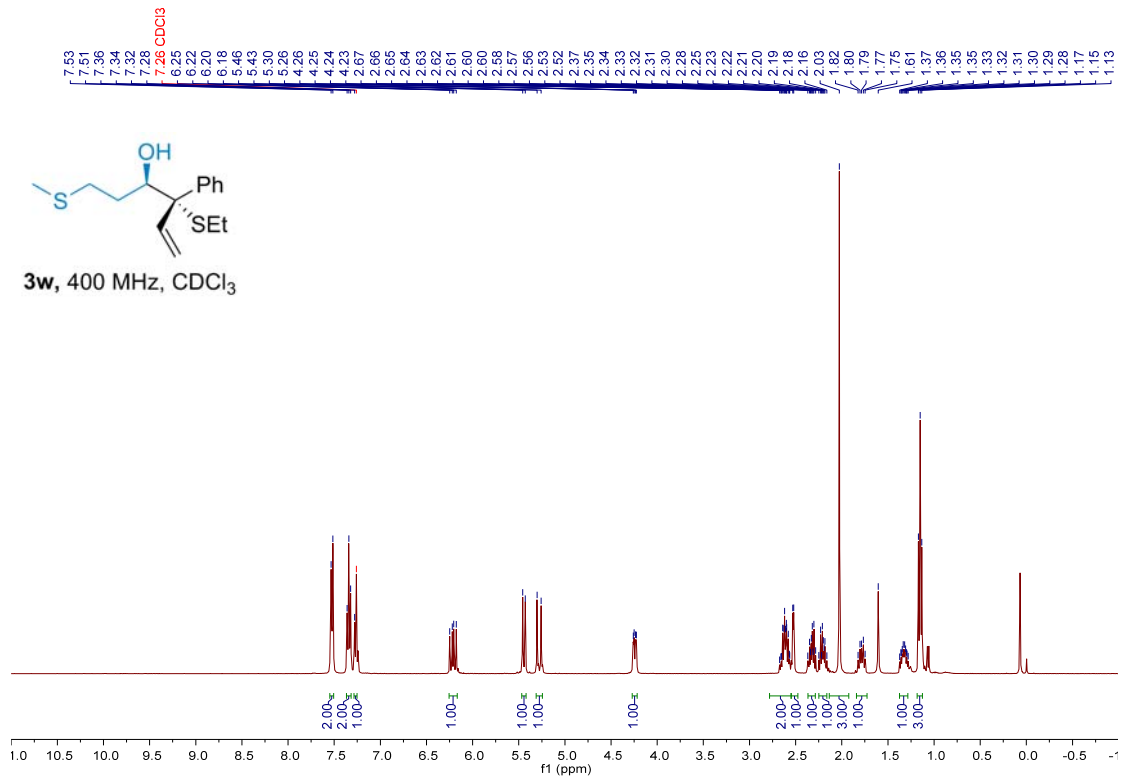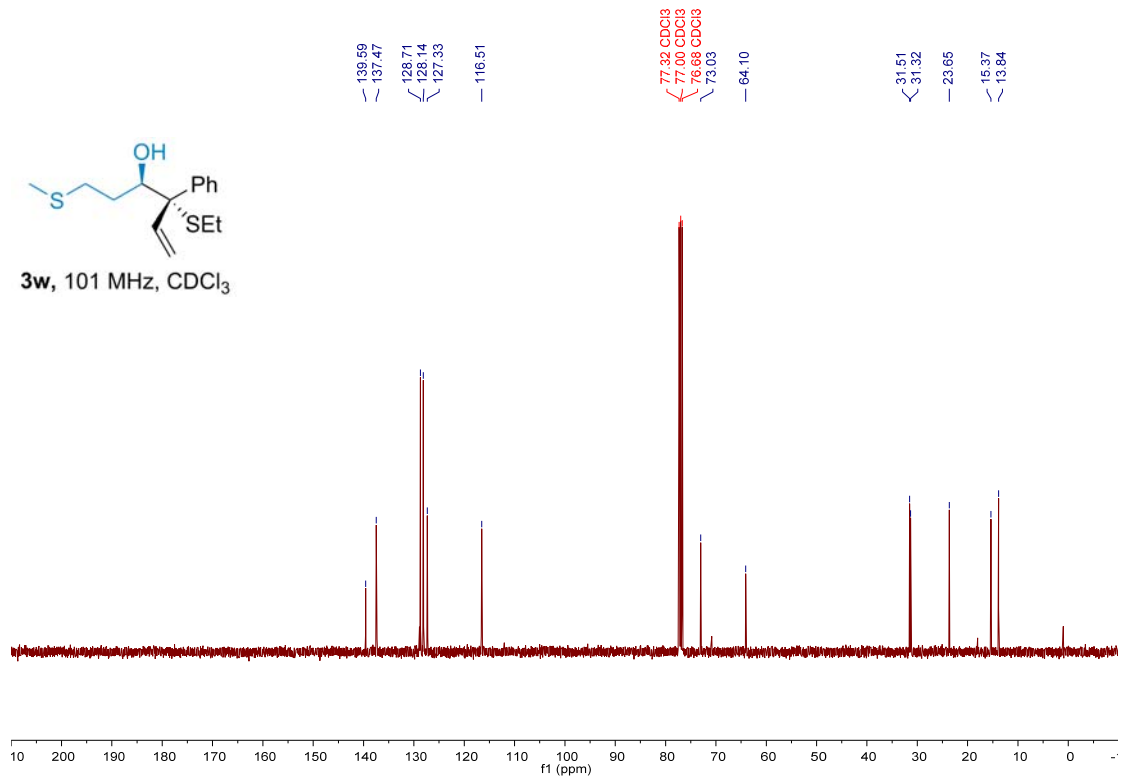

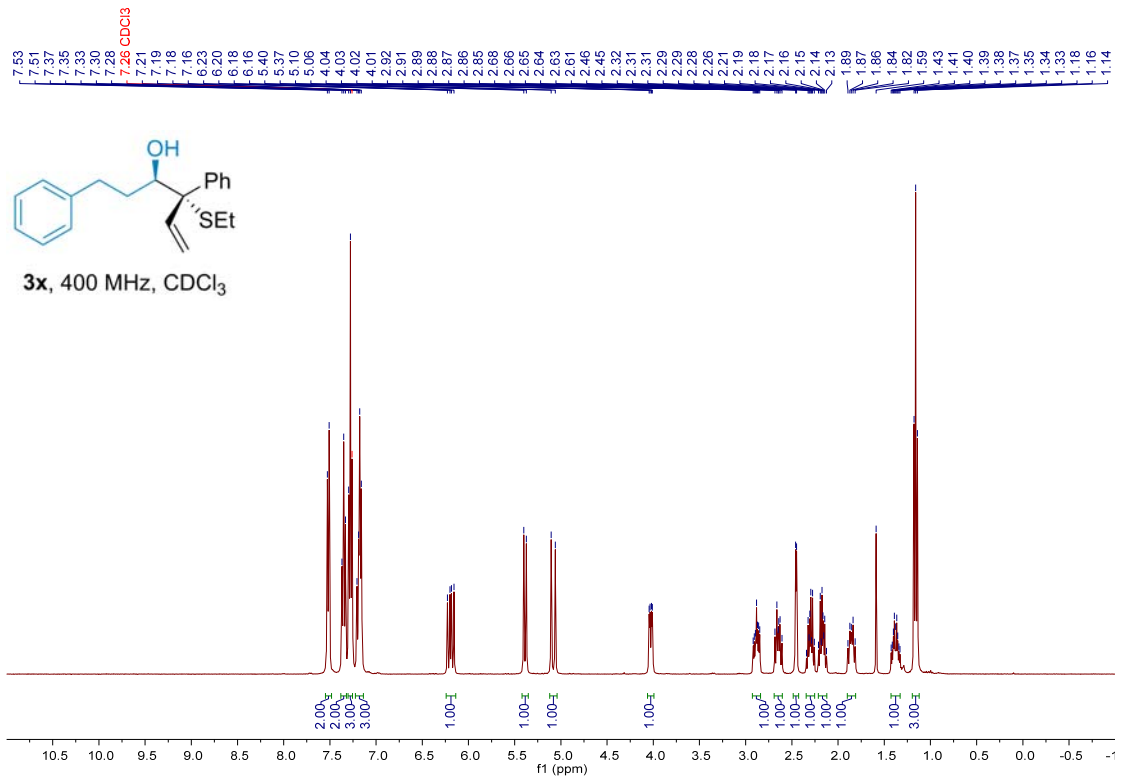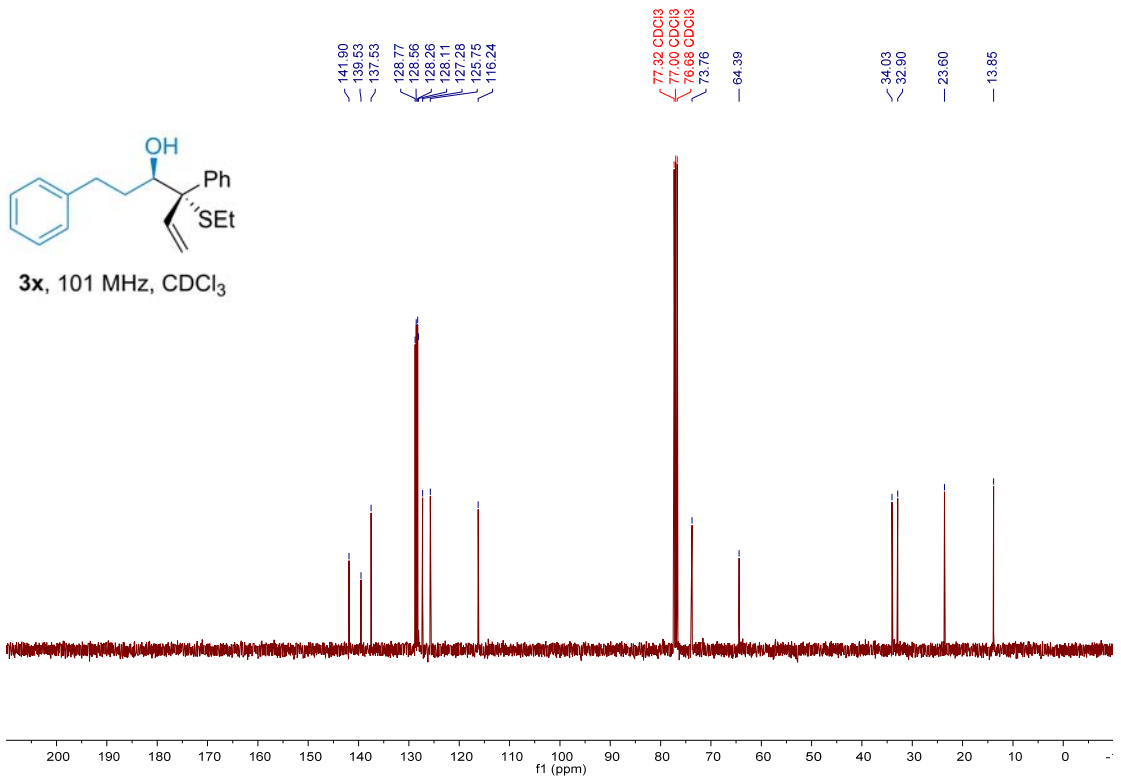

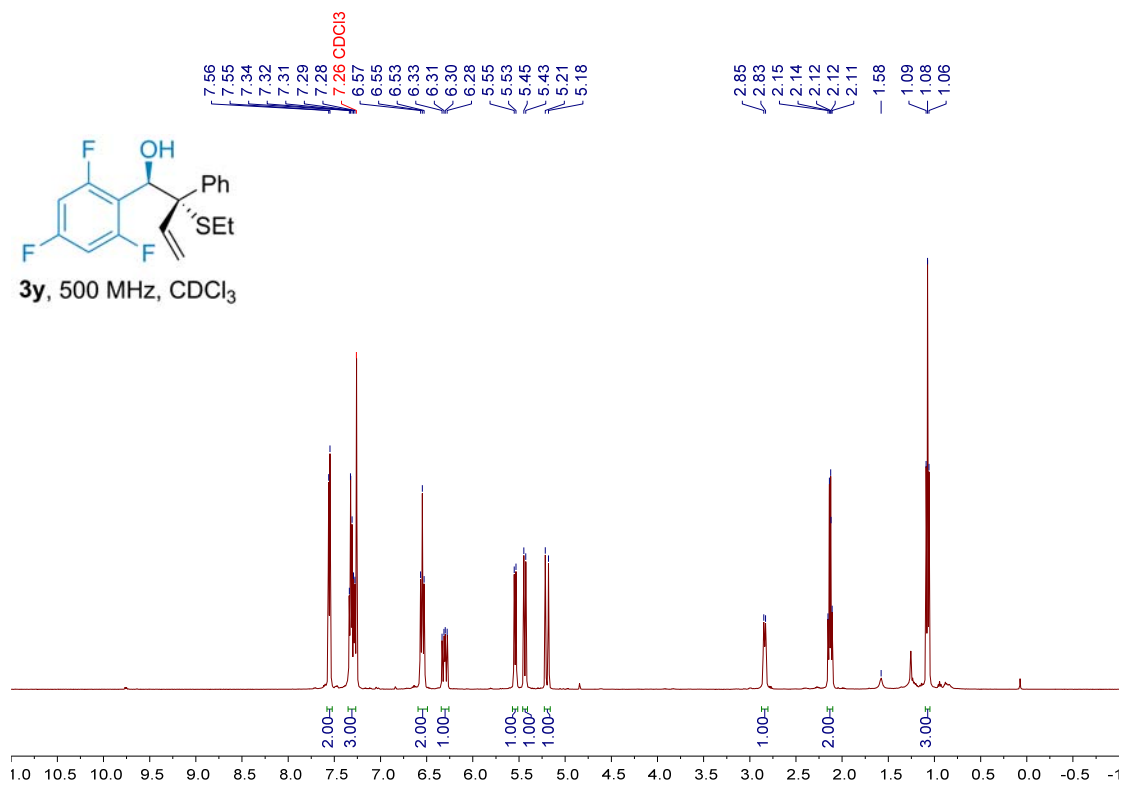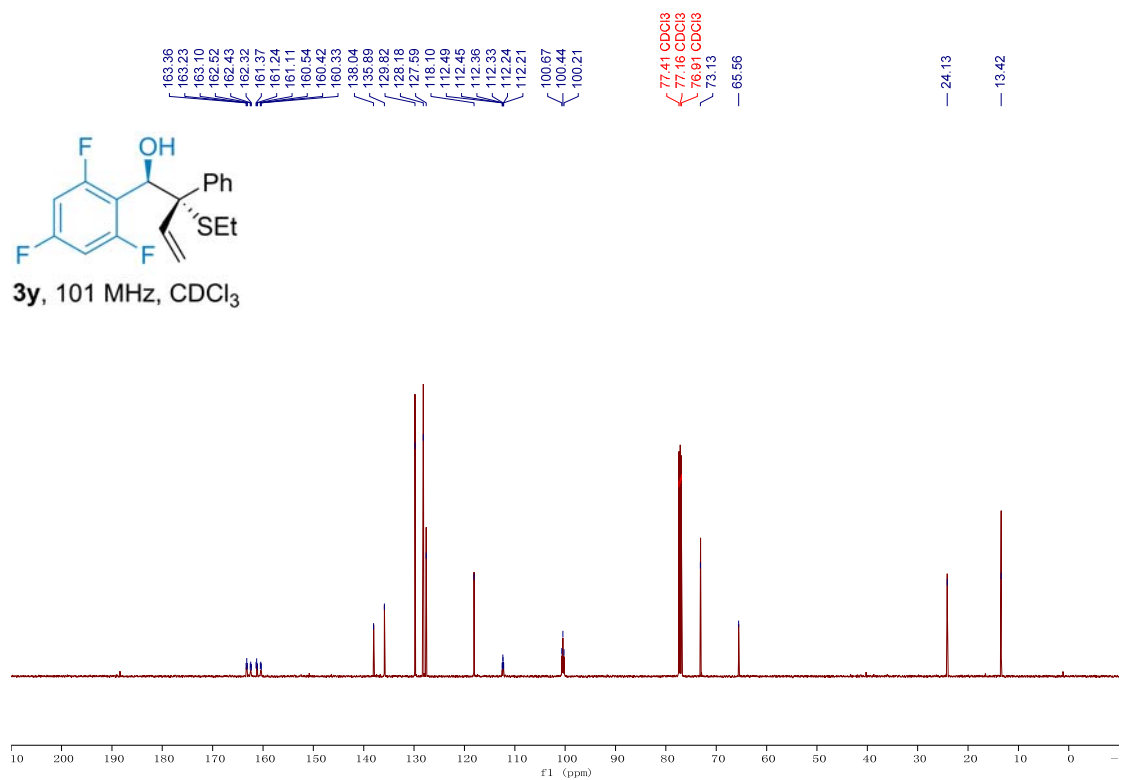

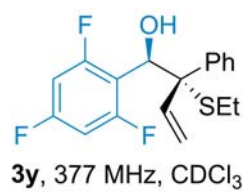

-105.11  
-108.22  
-108.24  
-108.26

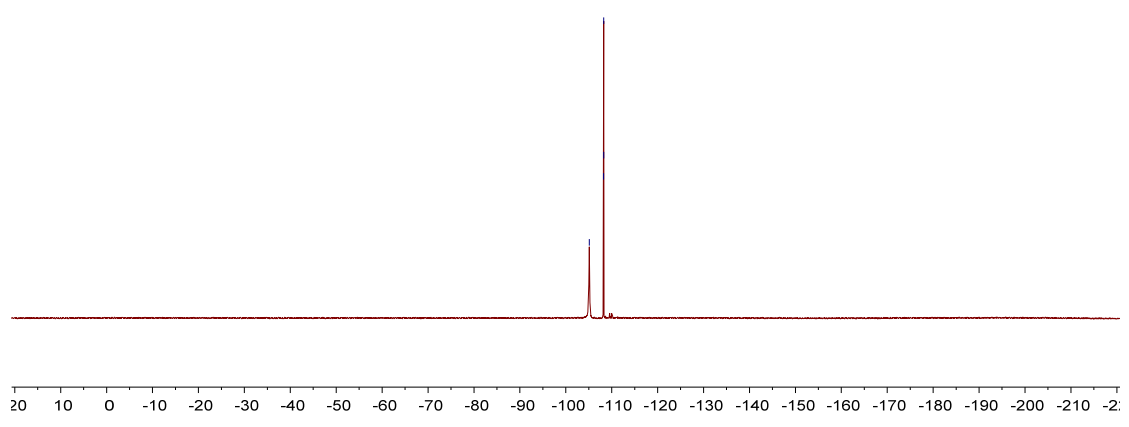

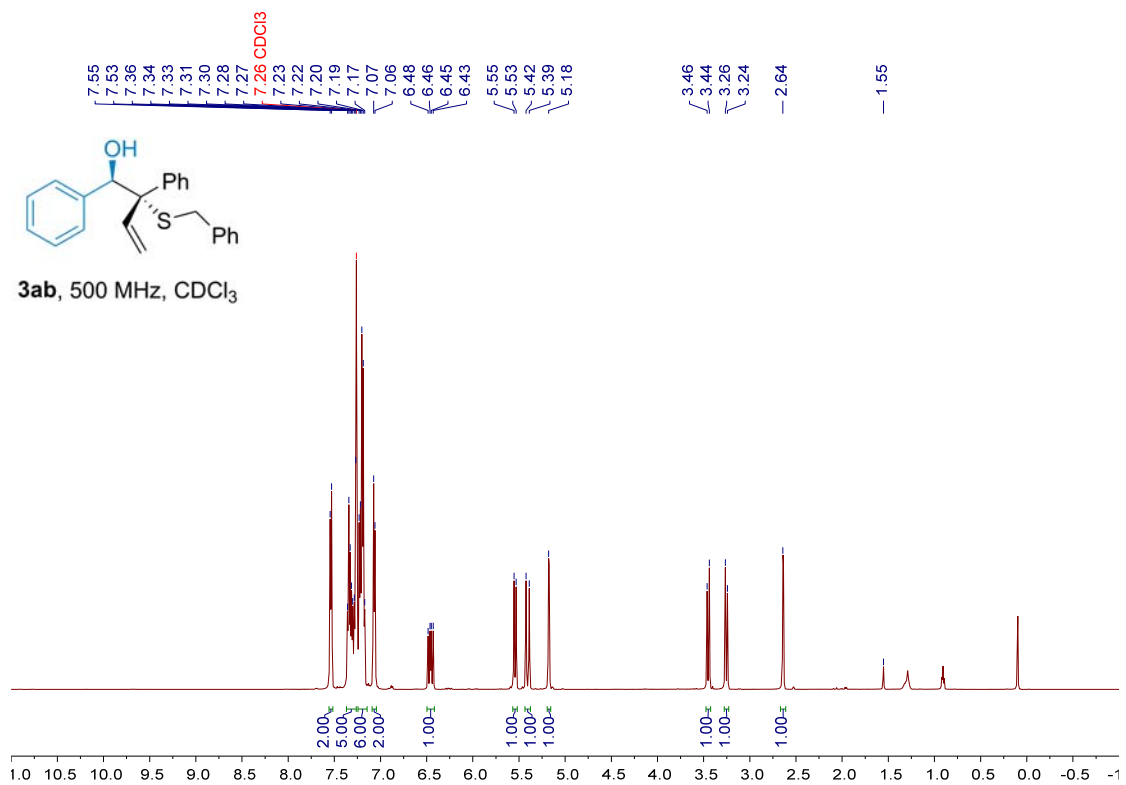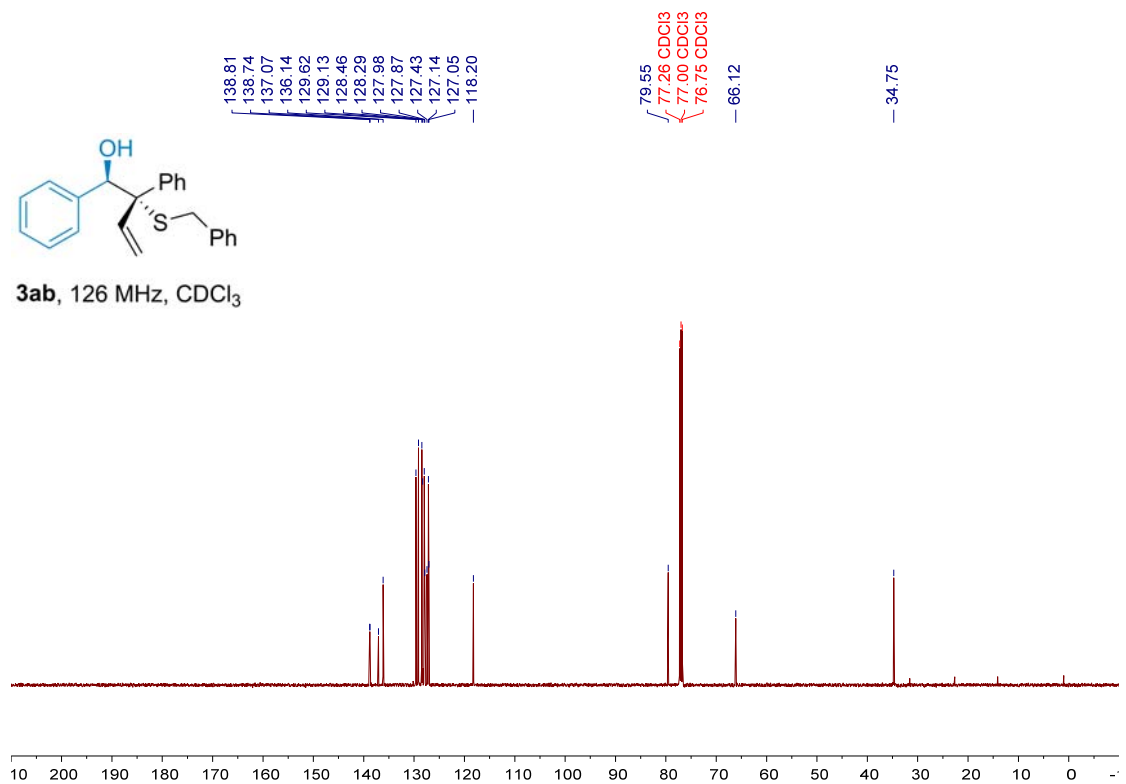

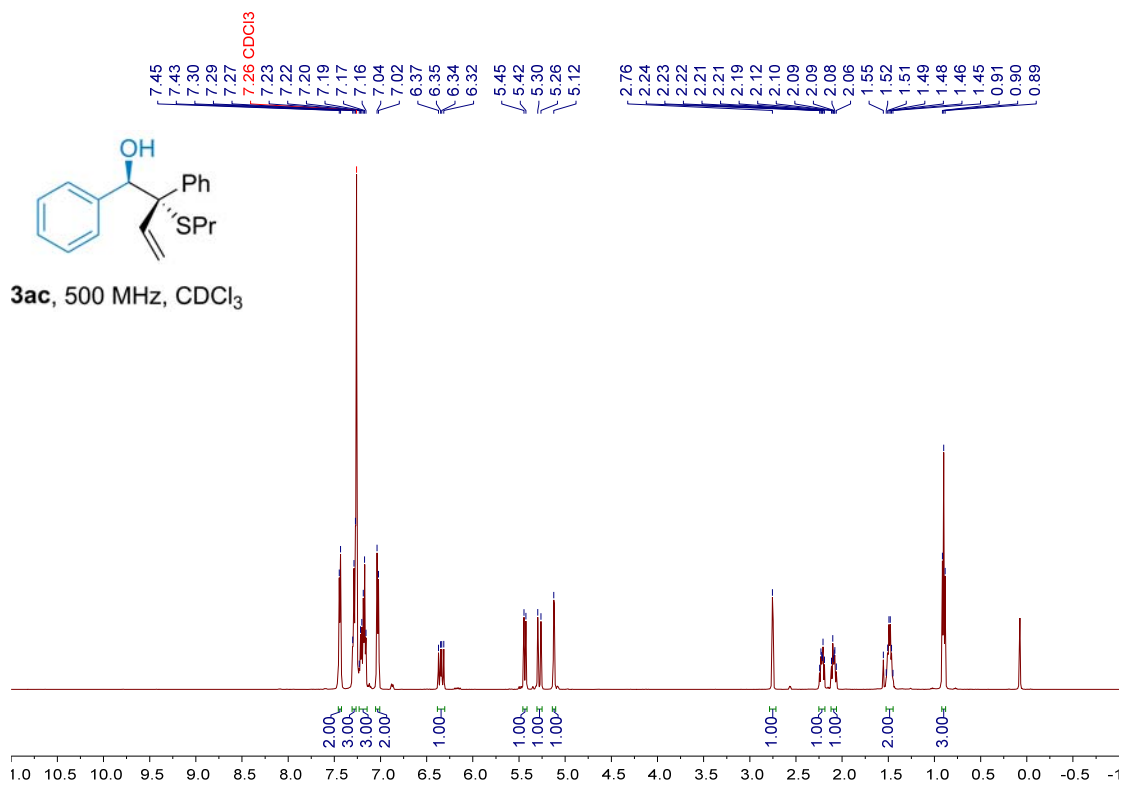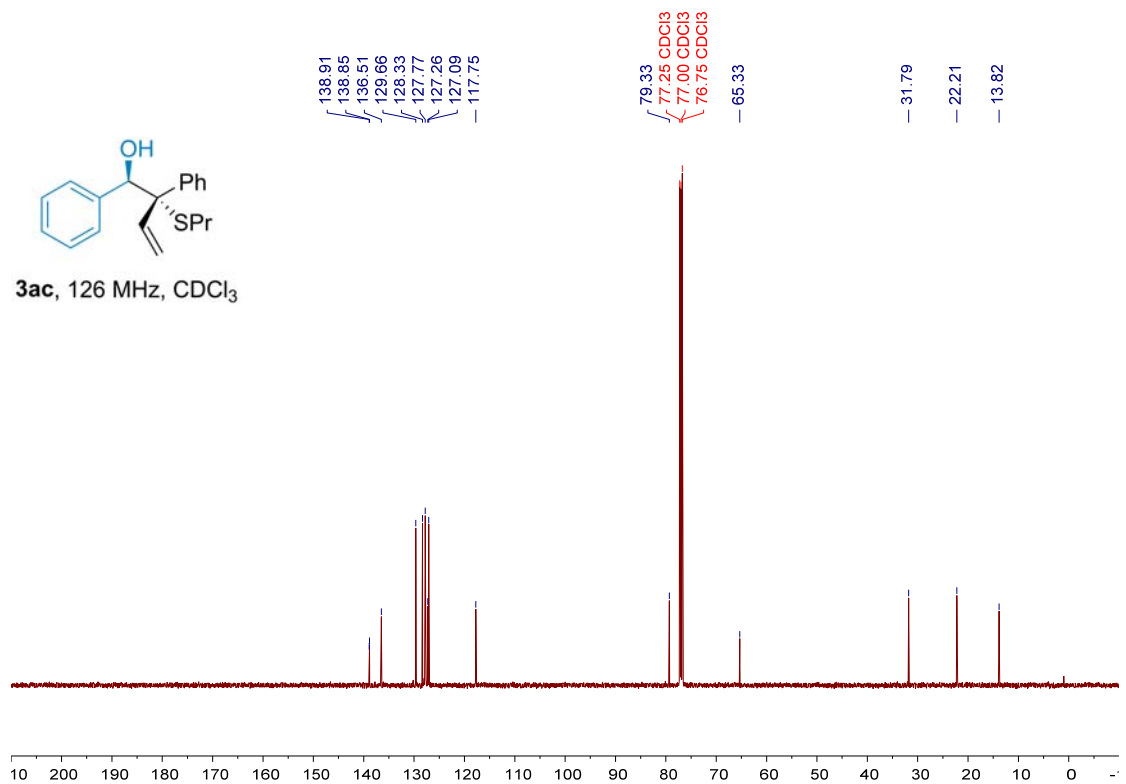

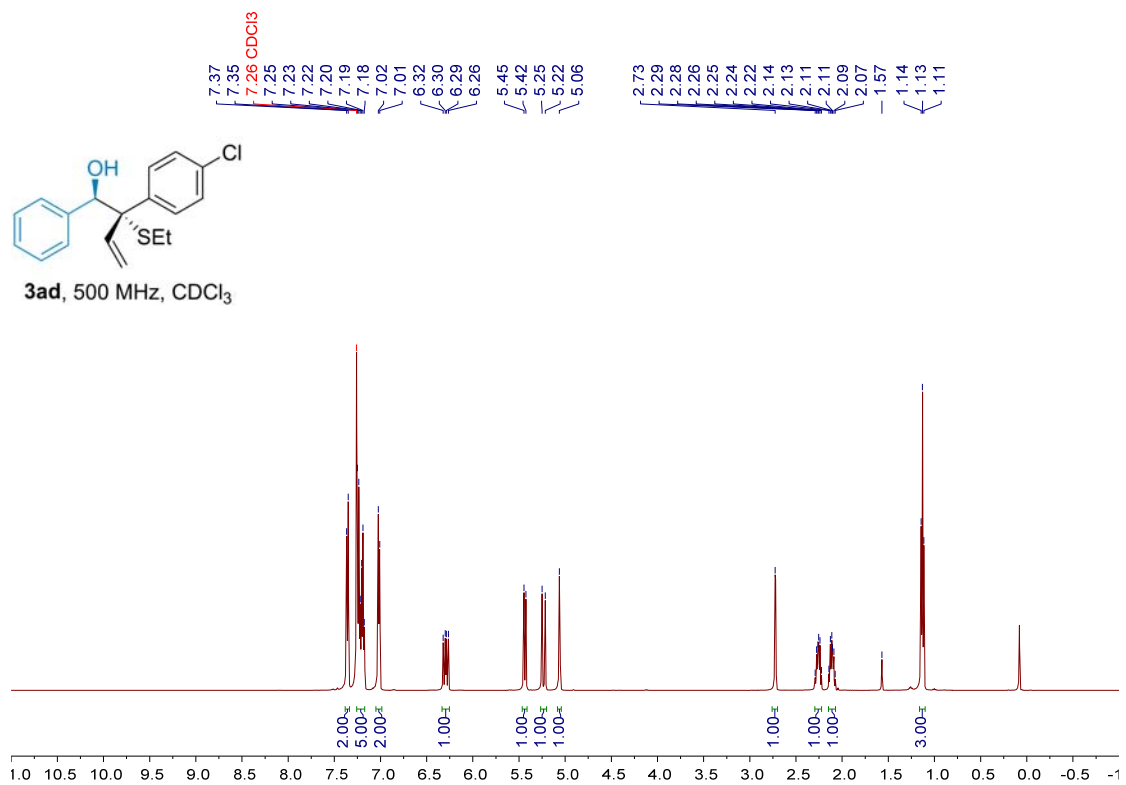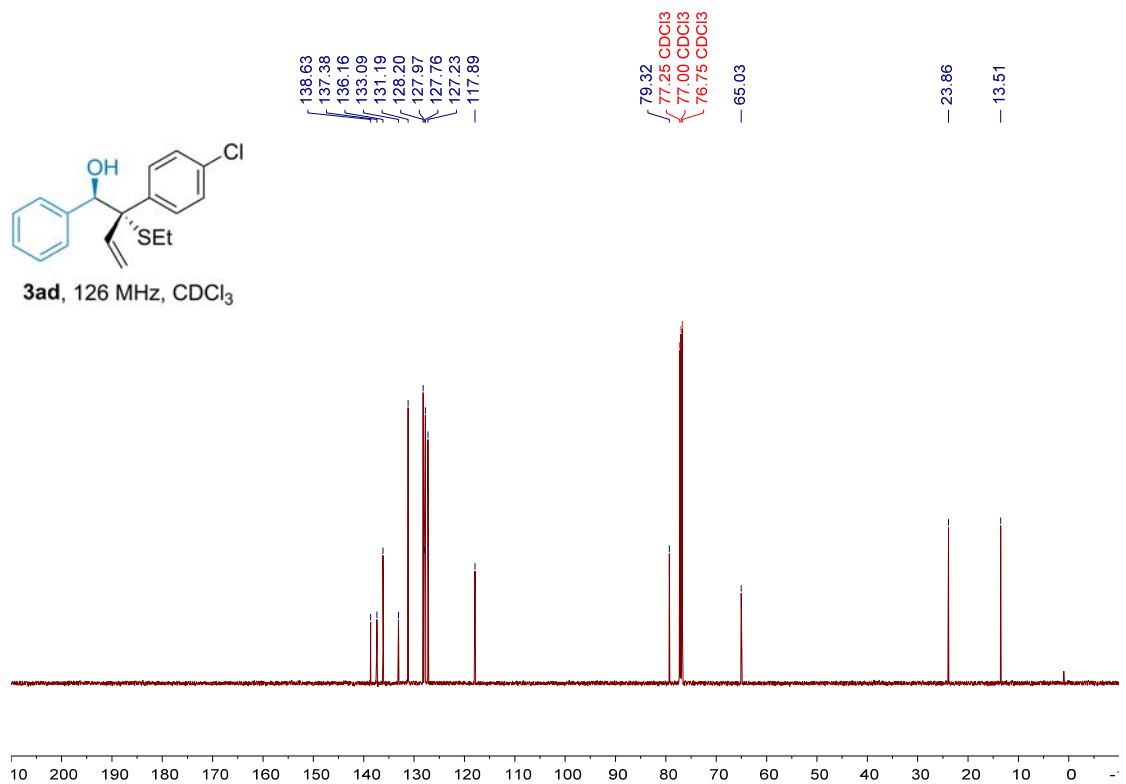

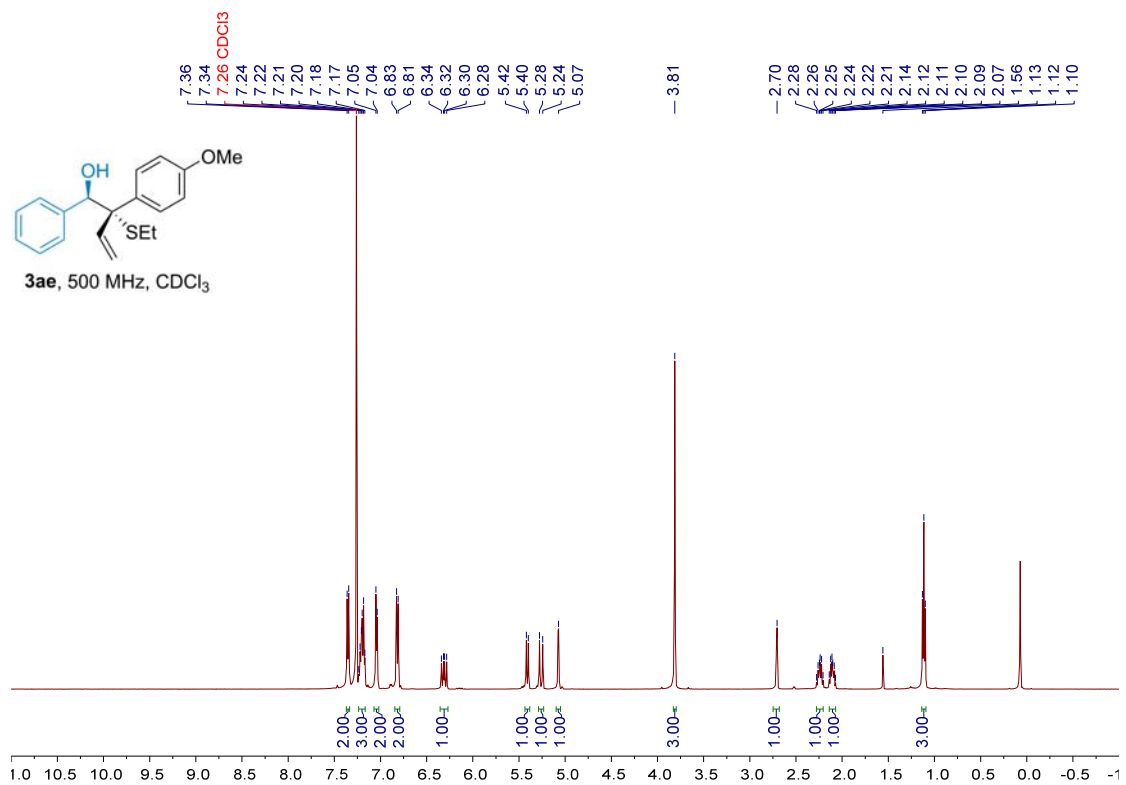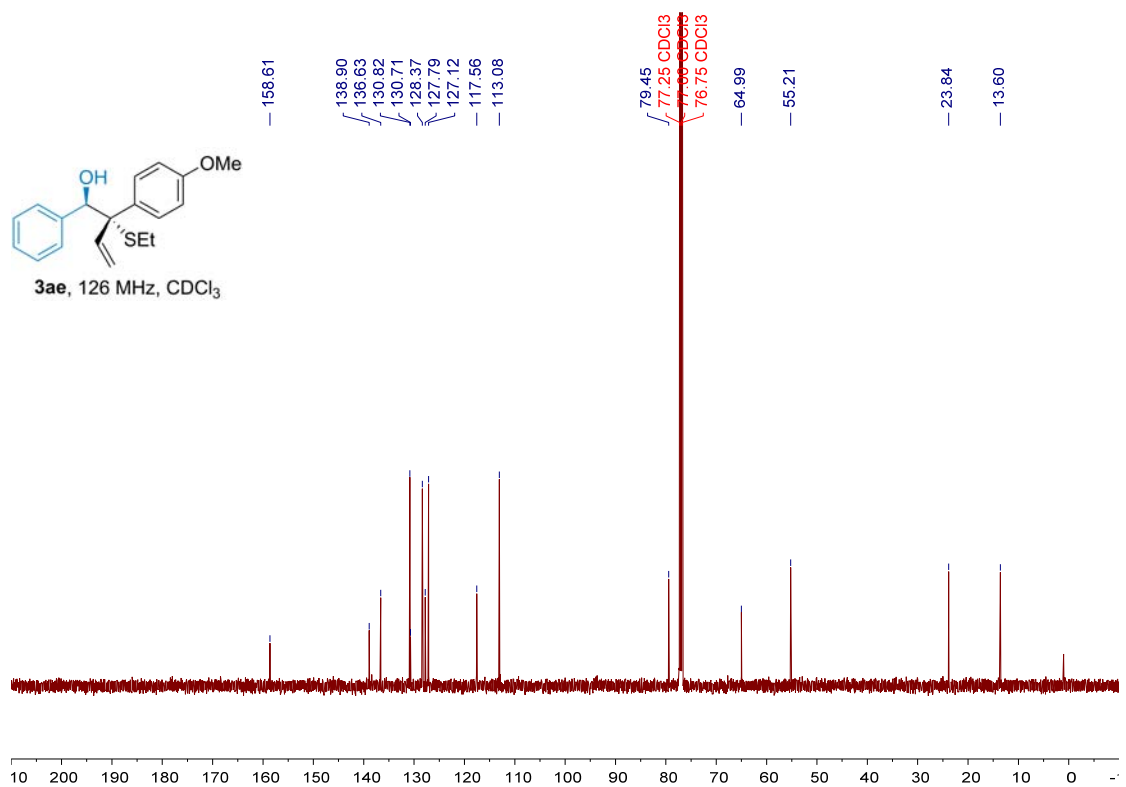

Supplement: d6cc01783e1.pdf [file d6cc01783e1.pdf]
